# Supplementary material for: Entrepreneurship Education as a Catalyst for Community Welfare: An Empirical Examination of Human Capital and Socioeconomic Outcomes
Source: Research Square preprint supplement (doi:10.21203/rs.3.rs-8717122/v1), 2026-02-16
Supplement: Supplementary file 1 [file 4f3a985b1d9c6d6f4c15fea9.xlsx]

## Sheet: Navigation
	SmartPLS report
	Please cite the use of SmartPLS: Ringle, C. M., Wende, S., and Becker, J.-M. 2024. "SmartPLS 4." Bönningstedt: SmartPLS, https://www.smartpls.com.
		complete
	Final results
	Path coefficients
	Intercepts
	Total indirect effects
	Specific indirect effects
	Total effects
	Outer loadings
	Outer weights
	Quality criteria
	R-square
	R-square adjusted
	f-square
	Average variance extracted (AVE)
	Composite reliability (rho_c)
	Composite reliability (rho_a)
	Cronbach's alpha
	Heterotrait-monotrait ratio (HTMT)
	Latent variable correlations
	Model fit
	SRMR
	d_ULS
	d_G
	Algorithm
	Setting
	Samples
	Execution log
	Histograms
	Path coefficients histogram
	Indirect effects histogram
	Total effects histogram
	Outer weights histogram
	Model and data
	Inner model
	Outer model
	Indicator data (original)
	Indicator data (standardized)

## Sheet: complete
	SmartPLS report
	Please cite the use of SmartPLS: Ringle, C. M., Wende, S., and Becker, J.-M. 2024. "SmartPLS 4." Bönningstedt: SmartPLS, https://www.smartpls.com.
	Final results
	Path coefficients
	Mean, STDEV, T values, p values
		Original sample (O)	Sample mean (M)	Standard deviation (STDEV)	T statistics (|O/STDEV|)	P values
	EE -> CW	0.364901	0.365706	0.1011	3.60929	0.000310044
	EE -> HC	0.182347	0.182332	0.0573137	3.18156	0.00147383
	HC -> CW	0.45573	0.449325	0.108266	4.20935	2.60603e-05
	IS -> CW	-0.0733625	-0.0702268	0.145111	0.505563	0.613186
	IS -> HC	0.723895	0.724231	0.0559034	12.949	5.68434e-14
	Confidence intervals
		Original sample (O)	Sample mean (M)	2.5%	97.5%
	EE -> CW	0.364901	0.365706	0.161065	0.558249
	EE -> HC	0.182347	0.182332	0.0673775	0.290275
	HC -> CW	0.45573	0.449325	0.228355	0.660008
	IS -> CW	-0.0733625	-0.0702268	-0.352677	0.218436
	IS -> HC	0.723895	0.724231	0.61548	0.833805
	Confidence intervals bias corrected
		Original sample (O)	Sample mean (M)	Bias	2.5%	97.5%
	EE -> CW	0.364901	0.365706	0.000805181	0.15925	0.554943
	EE -> HC	0.182347	0.182332	-1.53555e-05	0.0654618	0.289322
	HC -> CW	0.45573	0.449325	-0.00640516	0.246316	0.671905
	IS -> CW	-0.0733625	-0.0702268	0.00313574	-0.352049	0.218436
	IS -> HC	0.723895	0.724231	0.000336283	0.61687	0.835251
	Intercepts
	The absence of this result is intentional and aligns with your model or chosen algorithm settings.
	Total indirect effects
	Mean, STDEV, T values, p values
		Original sample (O)	Sample mean (M)	Standard deviation (STDEV)	T statistics (|O/STDEV|)	P values
	EE -> CW	0.0831009	0.0825981	0.0347003	2.39482	0.0166653
	IS -> CW	0.3299	0.325065	0.0813623	4.05471	5.09611e-05
	Confidence intervals
		Original sample (O)	Sample mean (M)	2.5%	97.5%
	EE -> CW	0.0831009	0.0825981	0.0229078	0.157447
	IS -> CW	0.3299	0.325065	0.163646	0.488088
	Confidence intervals bias corrected
		Original sample (O)	Sample mean (M)	Bias	2.5%	97.5%
	EE -> CW	0.0831009	0.0825981	-0.000502861	0.0289461	0.166827
	IS -> CW	0.3299	0.325065	-0.00483532	0.182129	0.50361
	Specific indirect effects
	Mean, STDEV, T values, p values
		Original sample (O)	Sample mean (M)	Standard deviation (STDEV)	T statistics (|O/STDEV|)	P values
	IS -> HC -> CW	0.3299	0.325065	0.0813623	4.05471	5.09611e-05
	EE -> HC -> CW	0.0831009	0.0825981	0.0347003	2.39482	0.0166653
	Confidence intervals
		Original sample (O)	Sample mean (M)	2.5%	97.5%
	IS -> HC -> CW	0.3299	0.325065	0.163646	0.488088
	EE -> HC -> CW	0.0831009	0.0825981	0.0229078	0.157447
	Confidence intervals bias corrected
		Original sample (O)	Sample mean (M)	Bias	2.5%	97.5%
	IS -> HC -> CW	0.3299	0.325065	-0.00483532	0.182129	0.50361
	EE -> HC -> CW	0.0831009	0.0825981	-0.000502861	0.0289461	0.166827
	Total effects
	Mean, STDEV, T values, p values
		Original sample (O)	Sample mean (M)	Standard deviation (STDEV)	T statistics (|O/STDEV|)	P values
	EE -> CW	0.448002	0.448304	0.102173	4.38476	1.18503e-05
	EE -> HC	0.182347	0.182332	0.0573137	3.18156	0.00147383
	HC -> CW	0.45573	0.449325	0.108266	4.20935	2.60603e-05
	IS -> CW	0.256538	0.254838	0.11816	2.1711	0.0299702
	IS -> HC	0.723895	0.724231	0.0559034	12.949	5.68434e-14
	Confidence intervals
		Original sample (O)	Sample mean (M)	2.5%	97.5%
	EE -> CW	0.448002	0.448304	0.246158	0.640036
	EE -> HC	0.182347	0.182332	0.0673775	0.290275
	HC -> CW	0.45573	0.449325	0.228355	0.660008
	IS -> CW	0.256538	0.254838	0.024989	0.488561
	IS -> HC	0.723895	0.724231	0.61548	0.833805
	Confidence intervals bias corrected
		Original sample (O)	Sample mean (M)	Bias	2.5%	97.5%
	EE -> CW	0.448002	0.448304	0.00030232	0.242748	0.634713
	EE -> HC	0.182347	0.182332	-1.53555e-05	0.0654618	0.289322
	HC -> CW	0.45573	0.449325	-0.00640516	0.246316	0.671905
	IS -> CW	0.256538	0.254838	-0.00169958	0.0282157	0.492214
	IS -> HC	0.723895	0.724231	0.000336283	0.61687	0.835251
	Outer loadings
	Mean, STDEV, T values, p values
		Original sample (O)	Sample mean (M)	Standard deviation (STDEV)	T statistics (|O/STDEV|)	P values
	CW1 <- CW	0.895447	0.894377	0.0164064	54.579	5.68434e-14
	CW2 <- CW	0.83782	0.837492	0.0206556	40.5615	5.68434e-14
	CW3 <- CW	0.900781	0.900165	0.0137037	65.7328	5.68434e-14
	CW4 <- CW	0.915326	0.914862	0.0111643	81.9867	5.68434e-14
	CW5 <- CW	0.882272	0.881678	0.0150767	58.5188	5.68434e-14
	EE1 <- EE	0.833632	0.832003	0.0253115	32.935	5.68434e-14
	EE2 <- EE	0.886427	0.885425	0.0168702	52.5439	5.68434e-14
	EE3 <- EE	0.816638	0.813081	0.028149	29.0112	5.68434e-14
	EE4 <- EE	0.880985	0.878521	0.0216748	40.6457	5.68434e-14
	EE5 <- EE	0.803972	0.804681	0.0238276	33.7412	5.68434e-14
	HC1 <- HC	0.889054	0.889056	0.0138712	64.0938	5.68434e-14
	HC2 <- HC	0.879386	0.879903	0.0151011	58.2332	5.68434e-14
	HC3 <- HC	0.832196	0.8295	0.0289097	28.786	5.68434e-14
	HC4 <- HC	0.874517	0.87379	0.0360435	24.2628	5.68434e-14
	HC5 <- HC	0.944691	0.944558	0.00929032	101.685	5.68434e-14
	IS1 <- IS	0.875333	0.874491	0.0192503	45.4712	5.68434e-14
	IS2 <- IS	0.889887	0.886792	0.0253781	35.0651	5.68434e-14
	IS3 <- IS	0.910994	0.910346	0.0146565	62.1561	5.68434e-14
	IS4 <- IS	0.789943	0.789729	0.0317039	24.9163	5.68434e-14
	IS5 <- IS	0.766284	0.766296	0.0527329	14.5314	5.68434e-14
	Confidence intervals
		Original sample (O)	Sample mean (M)	2.5%	97.5%
	CW1 <- CW	0.895447	0.894377	0.858497	0.92284
	CW2 <- CW	0.83782	0.837492	0.793317	0.874976
	CW3 <- CW	0.900781	0.900165	0.869592	0.923943
	CW4 <- CW	0.915326	0.914862	0.890888	0.934393
	CW5 <- CW	0.882272	0.881678	0.849809	0.90782
	EE1 <- EE	0.833632	0.832003	0.775564	0.874693
	EE2 <- EE	0.886427	0.885425	0.848042	0.914047
	EE3 <- EE	0.816638	0.813081	0.750142	0.860201
	EE4 <- EE	0.880985	0.878521	0.829753	0.914063
	EE5 <- EE	0.803972	0.804681	0.757527	0.84986
	HC1 <- HC	0.889054	0.889056	0.859656	0.912993
	HC2 <- HC	0.879386	0.879903	0.848042	0.90703
	HC3 <- HC	0.832196	0.8295	0.765014	0.877751
	HC4 <- HC	0.874517	0.87379	0.792681	0.9283
	HC5 <- HC	0.944691	0.944558	0.924948	0.960855
	IS1 <- IS	0.875333	0.874491	0.833225	0.907306
	IS2 <- IS	0.889887	0.886792	0.828428	0.926536
	IS3 <- IS	0.910994	0.910346	0.878539	0.935677
	IS4 <- IS	0.789943	0.789729	0.722768	0.846848
	IS5 <- IS	0.766284	0.766296	0.647549	0.850893
	Confidence intervals bias corrected
		Original sample (O)	Sample mean (M)	Bias	2.5%	97.5%
	CW1 <- CW	0.895447	0.894377	-0.00107001	0.857778	0.92222
	CW2 <- CW	0.83782	0.837492	-0.000328101	0.79064	0.872435
	CW3 <- CW	0.900781	0.900165	-0.000615757	0.868917	0.923487
	CW4 <- CW	0.915326	0.914862	-0.000463419	0.889422	0.934017
	CW5 <- CW	0.882272	0.881678	-0.000593705	0.848754	0.907221
	EE1 <- EE	0.833632	0.832003	-0.00162897	0.775262	0.874396
	EE2 <- EE	0.886427	0.885425	-0.00100166	0.846879	0.913301
	EE3 <- EE	0.816638	0.813081	-0.00355679	0.75312	0.861215
	EE4 <- EE	0.880985	0.878521	-0.00246378	0.829702	0.913923
	EE5 <- EE	0.803972	0.804681	0.000709262	0.754797	0.847502
	HC1 <- HC	0.889054	0.889056	1.86296e-06	0.856298	0.911463
	HC2 <- HC	0.879386	0.879903	0.00051655	0.844407	0.904486
	HC3 <- HC	0.832196	0.8295	-0.00269549	0.764869	0.877738
	HC4 <- HC	0.874517	0.87379	-0.000726674	0.776018	0.924464
	HC5 <- HC	0.944691	0.944558	-0.00013333	0.923797	0.960038
	IS1 <- IS	0.875333	0.874491	-0.000842579	0.831746	0.906342
	IS2 <- IS	0.889887	0.886792	-0.00309465	0.828428	0.926487
	IS3 <- IS	0.910994	0.910346	-0.000647669	0.877751	0.934889
	IS4 <- IS	0.789943	0.789729	-0.000213937	0.717252	0.843388
	IS5 <- IS	0.766284	0.766296	1.24838e-05	0.630404	0.843685
	Outer weights
	Mean, STDEV, T values, p values
		Original sample (O)	Sample mean (M)	Standard deviation (STDEV)	T statistics (|O/STDEV|)	P values
	CW1 <- CW	0.241887	0.241756	0.0100686	24.0238	5.68434e-14
	CW2 <- CW	0.178512	0.178903	0.0118969	15.005	5.68434e-14
	CW3 <- CW	0.218071	0.21818	0.00907484	24.0302	5.68434e-14
	CW4 <- CW	0.241351	0.241367	0.0087518	27.5773	5.68434e-14
	CW5 <- CW	0.245382	0.24558	0.0116999	20.9729	5.68434e-14
	EE1 <- EE	0.240794	0.240586	0.0102866	23.4086	5.68434e-14
	EE2 <- EE	0.233204	0.234265	0.00949034	24.5728	5.68434e-14
	EE3 <- EE	0.187146	0.186978	0.0101443	18.4483	5.68434e-14
	EE4 <- EE	0.235308	0.234855	0.0088238	26.6674	5.68434e-14
	EE5 <- EE	0.289084	0.290867	0.0183347	15.767	5.68434e-14
	HC1 <- HC	0.240314	0.240813	0.00914778	26.2702	5.68434e-14
	HC2 <- HC	0.228721	0.229297	0.0086958	26.3025	5.68434e-14
	HC3 <- HC	0.199334	0.198409	0.0080599	24.7315	5.68434e-14
	HC4 <- HC	0.21381	0.213824	0.0101407	21.0843	5.68434e-14
	HC5 <- HC	0.245952	0.246014	0.00748121	32.876	5.68434e-14
	IS1 <- IS	0.224308	0.224339	0.00959477	23.3782	5.68434e-14
	IS2 <- IS	0.219206	0.218095	0.0103925	21.0927	5.68434e-14
	IS3 <- IS	0.250725	0.251152	0.00985868	25.4319	5.68434e-14
	IS4 <- IS	0.218801	0.219678	0.0133891	16.3418	5.68434e-14
	IS5 <- IS	0.270576	0.271478	0.0154784	17.4808	5.68434e-14
	Confidence intervals
		Original sample (O)	Sample mean (M)	2.5%	97.5%
	CW1 <- CW	0.241887	0.241756	0.223476	0.263399
	CW2 <- CW	0.178512	0.178903	0.15441	0.201858
	CW3 <- CW	0.218071	0.21818	0.199993	0.236663
	CW4 <- CW	0.241351	0.241367	0.225286	0.259589
	CW5 <- CW	0.245382	0.24558	0.222723	0.269683
	EE1 <- EE	0.240794	0.240586	0.221397	0.262583
	EE2 <- EE	0.233204	0.234265	0.217317	0.254414
	EE3 <- EE	0.187146	0.186978	0.166211	0.20615
	EE4 <- EE	0.235308	0.234855	0.21742	0.2525
	EE5 <- EE	0.289084	0.290867	0.261219	0.332763
	HC1 <- HC	0.240314	0.240813	0.225593	0.260775
	HC2 <- HC	0.228721	0.229297	0.214264	0.247973
	HC3 <- HC	0.199334	0.198409	0.181207	0.213219
	HC4 <- HC	0.21381	0.213824	0.192097	0.231939
	HC5 <- HC	0.245952	0.246014	0.233251	0.262697
	IS1 <- IS	0.224308	0.224339	0.206129	0.244152
	IS2 <- IS	0.219206	0.218095	0.19608	0.23719
	IS3 <- IS	0.250725	0.251152	0.234477	0.272742
	IS4 <- IS	0.218801	0.219678	0.195665	0.248635
	IS5 <- IS	0.270576	0.271478	0.245286	0.306439
	Confidence intervals bias corrected
		Original sample (O)	Sample mean (M)	Bias	2.5%	97.5%
	CW1 <- CW	0.241887	0.241756	-0.000130924	0.224371	0.265325
	CW2 <- CW	0.178512	0.178903	0.00039133	0.152762	0.200385
	CW3 <- CW	0.218071	0.21818	0.000109797	0.200302	0.236815
	CW4 <- CW	0.241351	0.241367	1.58787e-05	0.22592	0.260496
	CW5 <- CW	0.245382	0.24558	0.000197577	0.222647	0.269525
	EE1 <- EE	0.240794	0.240586	-0.000207667	0.222684	0.264118
	EE2 <- EE	0.233204	0.234265	0.00106071	0.216491	0.25302
	EE3 <- EE	0.187146	0.186978	-0.000167861	0.166405	0.20639
	EE4 <- EE	0.235308	0.234855	-0.00045237	0.218682	0.253426
	EE5 <- EE	0.289084	0.290867	0.0017826	0.261809	0.334237
	HC1 <- HC	0.240314	0.240813	0.000499287	0.226025	0.261476
	HC2 <- HC	0.228721	0.229297	0.000575609	0.214714	0.24898
	HC3 <- HC	0.199334	0.198409	-0.000925093	0.182548	0.214178
	HC4 <- HC	0.21381	0.213824	1.40964e-05	0.189717	0.230495
	HC5 <- HC	0.245952	0.246014	6.23262e-05	0.234707	0.265808
	IS1 <- IS	0.224308	0.224339	3.10232e-05	0.206722	0.244673
	IS2 <- IS	0.219206	0.218095	-0.00111042	0.197574	0.23806
	IS3 <- IS	0.250725	0.251152	0.00042678	0.235146	0.27401
	IS4 <- IS	0.218801	0.219678	0.000876612	0.195072	0.247727
	IS5 <- IS	0.270576	0.271478	0.000902382	0.24722	0.309505
	Quality criteria
	R-square
	The absence of this result is intentional and aligns with your model or chosen algorithm settings.
	R-square adjusted
	The absence of this result is intentional and aligns with your model or chosen algorithm settings.
	f-square
	The absence of this result is intentional and aligns with your model or chosen algorithm settings.
	Average variance extracted (AVE)
	The absence of this result is intentional and aligns with your model or chosen algorithm settings.
	Composite reliability (rho_c)
	The absence of this result is intentional and aligns with your model or chosen algorithm settings.
	Composite reliability (rho_a)
	The absence of this result is intentional and aligns with your model or chosen algorithm settings.
	Cronbach's alpha
	The absence of this result is intentional and aligns with your model or chosen algorithm settings.
	Heterotrait-monotrait ratio (HTMT)
	The absence of this result is intentional and aligns with your model or chosen algorithm settings.
	Latent variable correlations
	The absence of this result is intentional and aligns with your model or chosen algorithm settings.
	Model fit
	SRMR
	The absence of this result is intentional and aligns with your model or chosen algorithm settings.
	d_ULS
	The absence of this result is intentional and aligns with your model or chosen algorithm settings.
	d_G
	The absence of this result is intentional and aligns with your model or chosen algorithm settings.
	Algorithm
	Setting
	Data file
		Setting
	Data file	Data Penelitian ERJ
	Weighting vector	-
	PLS-SEM algorithm
		Setting
	Initial weights	1.0
	Max. number of iterations	3000
	Stop criterion	10⁻⁷
	Type of results	Standardized
	Use Lohmoeller settings?	No
	Weighting scheme	Path
	Bootstrapping
		Setting
	Complexity	Most important (faster)
	Confidence interval method	Percentile bootstrap
	Parallel processing	Yes
	Samples	5000
	Save results per sample	No
	Seed	Fixed seed
	Significance level	0.05
	Test type	Two tailed
	Construct outer weighting mode
		Setting
	CW	AUTOMATIC
	EE	AUTOMATIC
	HC	AUTOMATIC
	IS	AUTOMATIC
	Samples
	The absence of this result is intentional and aligns with your model or chosen algorithm settings.
	Execution log
	Reading score matrix of complete data set
	Calculating full data set.
	Calculating original sample.
	Running samples [5000 done] (15 seconds).
	Calculating inner weights. (1 seconds).
	Calculating indirect effects.
	Calculating specific indirect effects
	Calculating total effect.
	Calculating outer weights.
	Calculating outer loadings.
	Calculating outer loadings.
	Calculating model decoration.
	All calculations done.
	Histograms
	Path coefficients histogram
	Indirect effects histogram
	Total effects histogram
	Outer weights histogram
	Model and data
	Inner model
		CW	EE	HC	IS
	CW
	EE	1		1
	HC	1
	IS	1		1
	Outer model
		CW	EE	HC	IS
	CW1	-1
	CW2	-1
	CW3	-1
	CW4	-1
	CW5	-1
	EE1		-1
	EE2		-1
	EE3		-1
	EE4		-1
	EE5		-1
	HC1			-1
	HC2			-1
	HC3			-1
	HC4			-1
	HC5			-1
	IS1				-1
	IS2				-1
	IS3				-1
	IS4				-1
	IS5				-1
	Indicator data (original)
	Matrix
	Case index	CW1	CW2	CW3	CW4	CW5	EE1	EE2	EE3	EE4	EE5	HC1	HC2	HC3	HC4	HC5	IS1	IS2	IS3	IS4	IS5
	0	5	5	5	4	5	4	4	4	4	3	4	3	4	4	4	2	3	3	4	4
	1	4	5	4	4	5	4	4	4	4	3	2	3	3	3	3	2	3	3	4	3
	2	4	4	4	4	4	5	4	4	4	4	5	4	3	4	4	4	4	4	4	4
	3	5	5	5	5	5	5	4	4	4	4	4	4	5	4	4	2	3	3	4	4
	4	5	4	5	5	5	5	4	4	4	4	4	4	4	4	4	5	4	4	4	4
	5	3	4	5	4	4	4	4	4	4	4	4	4	3	4	4	4	4	4	4	4
	6	3	4	5	4	4	4	4	4	4	4	4	4	3	4	4	4	4	4	4	4
	7	5	5	5	5	4	3	4	3	4	4	5	4	3	4	4	4	5	5	4	4
	8	4	5	5	4	4	3	4	3	4	3	4	3	3	4	4	4	4	4	4	4
	9	5	4	5	4	4	4	4	4	4	3	4	3	3	4	4	5	5	4	4	4
	10	4	5	4	4	4	4	4	4	4	4	4	4	3	4	4	2	4	5	4	4
	11	3	4	3	2	2	5	5	4	5	4	4	4	4	4	4	5	5	5	5	4
	12	2	3	3	2	2	3	4	4	4	1	2	1	3	3	3	2	3	3	4	3
	13	5	5	5	4	4	3	4	3	4	4	4	4	4	4	4	4	4	4	4	4
	14	3	3	4	3	4	3	4	3	5	4	3	4	4	4	4	3	4	4	4	4
	15	3	3	3	3	3	3	4	3	4	4	3	4	4	4	4	4	4	4	4	4
	16	3	4	4	3	4	3	3	3	3	3	4	3	4	4	3	3	4	2	3	4
	17	3	4	4	3	4	3	4	3	3	3	3	3	3	4	3	3	4	3	4	4
	18	2	3	3	3	3	3	3	3	3	3	2	3	3	3	3	3	4	3	3	3
	19	2	3	3	2	2	3	3	3	3	2	2	2	2	3	2	2	1	1	3	3
	20	1	2	2	2	2	2	3	3	2	1	2	1	2	3	2	1	2	1	3	3
	21	2	3	3	2	2	3	3	3	2	2	2	2	2	3	2	2	2	2	3	3
	22	2	3	3	2	2	3	3	3	3	2	2	2	2	3	3	2	3	2	3	3
	23	2	3	3	2	2	3	3	3	3	2	2	2	2	3	3	1	2	2	3	3
	24	1	3	2	1	2	2	3	3	2	2	1	2	1	3	2	1	2	2	3	3
	25	3	4	4	3	3	3	3	3	3	3	2	3	3	4	3	2	3	2	3	4
	26	3	3	5	4	4	3	4	3	4	3	2	3	3	3	3	2	3	2	4	3
	27	2	3	3	2	3	3	4	3	4	3	2	3	3	3	3	2	3	3	4	3
	28	4	3	4	3	4	3	4	3	4	3	2	3	3	3	3	4	4	3	4	3
	29	3	4	4	3	4	3	4	3	3	3	4	3	4	4	4	4	4	3	4	4
	30	3	4	4	3	4	3	4	3	3	3	4	3	4	4	4	3	4	3	4	4
	31	3	3	3	3	3	3	4	3	4	3	4	3	4	4	4	3	4	4	4	4
	32	4	4	4	3	4	3	4	3	3	3	4	3	4	4	4	4	4	4	4	4
	33	3	3	3	3	3	3	4	3	4	4	3	4	4	4	4	3	4	4	4	4
	34	3	3	4	3	3	3	4	3	4	4	3	4	4	4	4	3	4	4	4	4
	35	3	3	3	3	3	3	4	3	4	4	4	4	4	4	4	3	4	2	4	4
	36	3	3	3	3	3	3	4	3	4	4	4	4	4	4	4	3	4	2	4	4
	37	3	3	4	3	3	3	4	3	4	4	4	4	4	4	4	3	4	4	4	4
	38	3	3	3	3	4	3	4	3	4	4	3	4	3	4	4	3	4	4	4	4
	39	3	3	3	3	4	3	4	3	4	4	3	4	4	4	4	3	4	4	4	4
	40	3	3	4	3	4	3	4	3	4	4	4	4	4	4	4	3	4	4	4	4
	41	4	3	4	3	4	4	4	3	4	4	4	4	4	4	4	4	4	4	4	4
	42	3	3	4	3	4	3	4	3	3	2	3	2	3	4	3	4	4	4	4	4
	43	4	3	4	3	4	3	4	3	3	4	4	4	4	4	4	4	4	4	4	4
	44	4	4	4	3	4	3	4	3	3	4	4	4	4	4	4	4	4	4	4	4
	45	4	4	4	3	4	3	4	3	4	4	4	4	4	4	4	4	4	4	4	4
	46	2	3	3	3	3	3	4	3	3	3	3	3	3	4	3	3	4	4	4	4
	47	3	4	4	3	4	4	4	4	4	4	4	4	4	4	4	3	4	4	4	4
	48	4	3	4	3	4	2	3	3	3	4	4	4	4	4	4	4	4	4	3	4
	49	4	3	4	3	4	4	4	3	4	4	4	4	4	4	4	4	4	4	4	4
	50	4	3	4	3	4	4	4	3	4	4	4	4	4	4	4	4	4	4	4	4
	51	4	3	4	3	4	4	4	3	4	4	4	4	4	4	4	4	4	4	4	4
	52	4	3	4	3	4	4	4	4	3	4	4	4	4	4	4	4	4	4	4	4
	53	3	3	3	3	4	3	4	3	4	4	4	4	4	4	4	4	4	4	4	4
	54	4	3	4	3	4	4	4	3	4	4	4	4	4	4	4	4	4	4	4	4
	55	3	3	3	2	3	3	4	3	4	4	3	4	3	4	4	4	4	4	4	4
	56	4	3	4	3	4	4	4	3	4	4	4	4	4	4	4	4	4	5	4	4
	57	3	3	3	3	3	3	4	3	4	4	3	4	3	4	4	4	4	4	4	4
	58	3	4	4	3	4	3	4	3	4	4	4	4	4	4	4	2	3	3	4	4
	59	4	4	4	3	4	4	4	3	4	4	4	4	4	4	4	2	3	3	4	4
	60	3	3	3	3	3	3	4	3	4	3	2	3	3	4	4	2	3	3	4	4
	61	4	5	5	4	4	4	4	4	3	3	3	3	3	4	3	4	4	4	4	4
	62	4	4	4	3	4	4	4	4	4	4	4	4	4	4	4	4	4	4	4	4
	63	4	4	4	3	4	4	4	3	4	4	4	4	4	4	4	4	4	4	4	4
	64	4	4	4	4	4	4	4	3	4	4	4	4	4	4	4	4	4	4	4	4
	65	4	4	4	4	4	3	4	3	4	4	4	4	4	4	4	4	4	4	4	4
	66	3	3	4	3	4	4	4	3	4	4	4	4	4	4	4	3	4	5	4	4
	67	4	4	4	3	4	4	4	4	4	4	4	4	4	4	4	4	4	4	4	4
	68	4	4	5	4	4	4	4	4	4	4	4	4	4	4	4	4	4	4	4	4
	69	4	4	5	4	4	4	4	4	4	4	3	4	4	4	4	4	4	4	4	4
	70	3	4	4	4	4	4	4	4	4	4	4	4	4	4	4	4	4	4	4	4
	71	4	5	4	4	4	4	4	4	4	4	3	4	4	4	4	3	4	4	4	4
	72	4	5	5	4	4	4	4	5	5	3	3	3	4	4	4	3	4	4	4	4
	73	4	4	5	5	4	4	4	4	4	5	3	5	4	4	4	4	4	4	4	4
	74	4	4	5	5	4	4	4	4	4	4	4	4	4	4	5	4	4	4	4	4
	75	4	4	5	4	4	3	4	3	4	4	4	4	4	4	4	4	4	4	4	4
	76	4	4	5	4	4	4	4	4	4	4	4	4	4	4	4	4	4	4	4	4
	77	5	5	5	4	5	4	4	4	4	4	4	4	4	4	4	4	4	4	4	4
	78	1	3	3	1	1	2	3	3	3	2	1	2	1	2	1	1	1	1	3	2
	79	3	3	3	2	2	3	4	3	4	1	1	1	1	3	3	1	2	1	4	3
	80	2	3	3	2	2	2	3	3	2	1	1	1	2	4	3	1	2	1	3	4
	81	2	3	3	1	1	1	2	2	2	1	1	1	1	2	1	1	2	1	2	2
	82	1	3	2	1	1	2	3	3	2	2	1	2	1	2	1	1	1	1	3	2
	83	4	4	3	2	2	2	1	1	2	2	1	2	3	4	3	3	2	2	1	4
	84	3	4	3	2	2	1	2	3	3	2	1	2	3	3	2	3	4	2	2	3
	85	2	3	3	2	2	1	2	2	1	2	2	2	1	3	2	1	2	1	2	3
	86	1	2	3	2	3	1	3	2	1	2	2	2	1	3	2	1	2	1	3	3
	87	1	2	2	2	3	2	3	2	1	2	2	2	2	3	2	1	2	1	3	3
	88	2	3	4	2	3	2	1	1	1	2	2	2	2	3	2	1	1	1	1	3
	89	2	3	3	2	2	1	2	2	1	2	1	2	2	3	2	1	2	2	2	3
	90	3	4	4	3	2	3	3	3	3	2	2	2	2	3	2	3	4	2	3	3
	91	2	3	3	3	2	3	3	3	3	3	2	3	2	3	3	3	4	2	3	3
	92	2	3	3	3	3	3	4	3	4	3	2	3	2	3	3	3	4	2	4	3
	93	4	5	5	5	4	5	5	4	4	4	5	4	4	4	4	5	5	5	5	4
	94	3	3	3	3	3	3	4	3	4	4	4	4	4	4	4	4	4	4	4	4
	95	3	3	3	3	3	3	4	3	4	4	4	4	4	4	4	4	4	4	4	4
	96	4	4	4	3	4	4	4	4	4	4	4	4	4	4	4	4	4	4	4	4
	97	4	4	4	3	4	4	4	4	4	4	4	4	4	4	4	4	4	5	4	4
	98	4	4	4	3	4	3	4	3	3	4	4	4	4	4	4	4	4	4	4	4
	99	4	4	4	3	4	3	4	3	4	4	5	4	4	4	4	4	4	4	4	4
	100	4	4	4	3	4	4	4	4	4	5	5	5	4	4	4	4	4	4	4	4
	101	4	4	4	4	4	3	4	3	3	5	4	5	4	4	4	4	4	4	4	4
	102	4	4	4	4	4	4	4	4	4	5	5	5	4	4	4	4	4	4	4	4
	103	4	4	4	4	4	4	4	4	4	4	4	4	4	4	4	4	4	4	4	4
	104	3	4	4	3	4	4	5	4	4	5	5	5	4	4	4	4	4	4	5	4
	105	3	4	4	3	4	4	5	4	4	5	4	5	4	4	4	4	4	4	5	4
	106	4	5	5	4	4	4	4	4	4	4	4	4	5	4	4	4	4	5	4	4
	107	3	4	4	3	4	4	4	4	4	5	4	5	4	4	4	4	4	4	4	4
	108	4	4	4	4	4	4	4	4	4	4	4	4	4	4	4	4	4	4	4	4
	109	4	4	4	4	4	4	5	5	5	5	5	5	4	4	4	5	5	4	5	4
	110	4	4	4	4	4	3	4	3	4	4	4	4	5	4	4	5	4	3	4	4
	111	4	5	5	4	5	4	4	4	4	4	4	4	5	4	4	5	5	5	4	4
	112	3	4	4	3	4	4	5	4	4	4	4	4	2	4	4	4	4	4	5	4
	113	4	4	5	4	4	4	5	5	5	3	3	3	3	4	3	4	4	4	5	4
	114	4	4	5	4	4	4	4	3	4	4	4	4	4	4	4	4	4	4	4	4
	115	5	5	5	4	4	3	5	4	5	5	5	5	5	4	4	5	4	4	5	4
	116	4	4	5	4	4	4	4	4	4	5	4	5	4	4	4	5	4	4	4	4
	117	4	5	5	4	5	4	4	4	4	4	4	4	4	4	4	5	4	4	4	4
	118	4	5	5	4	4	4	5	5	5	5	5	5	4	5	5	5	4	4	5	5
	119	4	5	5	4	4	4	5	5	5	5	5	5	5	5	5	5	4	4	5	5
	120	5	5	5	4	4	4	5	4	5	5	5	5	5	5	5	4	4	4	5	5
	121	3	4	4	3	4	4	4	4	4	4	4	4	4	4	4	4	4	4	4	4
	122	4	4	4	5	4	3	4	3	3	5	5	5	5	4	5	3	3	4	4	4
	123	5	5	5	5	5	4	4	3	4	4	4	4	4	4	4	5	4	4	4	4
	124	3	4	5	4	4	3	4	3	4	4	4	4	5	5	5	3	3	3	4	5
	125	4	5	4	3	4	3	4	3	3	4	4	4	5	5	5	3	3	3	4	5
	126	5	5	5	4	4	4	4	4	4	4	4	4	5	5	5	5	5	5	4	5
	127	5	4	4	3	4	4	5	5	5	4	4	4	3	4	4	5	5	4	5	4
	128	4	4	4	3	4	4	5	5	5	4	4	4	4	2	4	5	5	5	5	2
	129	5	4	4	3	4	4	5	5	5	4	4	4	4	4	4	4	5	5	5	4
	130	3	4	5	4	4	4	4	5	5	5	5	5	4	4	4	5	5	4	4	4
	131	3	4	4	5	4	4	4	4	4	4	4	4	5	4	4	4	5	5	4	4
	132	4	5	5	4	4	4	5	5	5	5	4	5	4	4	4	5	5	5	5	4
	133	5	4	4	4	4	4	4	4	4	4	4	4	4	5	4	3	3	4	4	5
	134	5	4	4	4	4	4	5	5	5	5	3	5	3	4	4	5	5	5	5	4
	135	5	5	5	5	5	4	5	5	5	4	4	4	5	4	4	5	5	4	5	4
	136	4	4	4	5	5	4	5	5	5	4	4	4	4	4	4	5	5	5	5	4
	137	5	5	5	5	4	5	5	4	4	5	5	5	4	5	5	5	5	5	5	5
	138	5	5	5	5	4	5	5	4	4	5	5	5	4	4	4	4	5	4	5	4
	139	5	5	5	5	5	4	4	4	4	5	4	5	4	4	4	3	4	4	4	4
	140	5	5	5	4	5	4	4	4	4	3	4	3	4	4	4	2	3	3	4	4
	141	4	5	4	4	5	4	4	4	4	3	2	3	3	3	3	2	3	3	4	3
	142	4	4	4	4	4	5	4	4	4	4	5	4	3	4	4	4	4	4	4	4
	143	5	5	5	5	5	5	4	4	4	4	4	4	5	4	4	2	3	3	4	4
	144	5	4	5	5	5	5	4	4	4	4	4	4	4	4	4	5	4	4	4	4
	145	3	4	5	4	4	4	4	4	4	4	4	4	3	4	4	4	4	4	4	4
	146	3	4	5	4	4	4	4	4	4	4	4	4	3	4	4	4	4	4	4	4
	147	5	5	5	5	4	3	4	3	4	4	5	4	3	4	4	4	5	5	4	4
	148	4	5	5	4	4	3	4	3	4	3	4	3	3	4	4	4	4	4	4	4
	149	5	5	5	4	5	4	4	4	4	3	4	3	4	4	4	2	3	3	4	4
	150	4	5	4	4	5	4	4	4	4	3	2	3	3	3	3	2	3	3	4	3
	151	4	4	4	4	4	5	4	4	4	4	5	4	3	4	4	4	4	4	4	4
	152	5	5	5	5	5	5	4	4	4	4	4	4	5	4	4	2	3	3	4	4
	153	5	4	5	5	5	5	4	4	4	4	4	4	4	4	4	5	4	4	4	4
	154	3	4	5	4	4	4	4	4	4	4	4	4	3	4	4	4	4	4	4	4
	155	3	4	5	4	4	4	4	4	4	4	4	4	3	4	4	4	4	4	4	4
	156	5	5	5	5	4	3	4	3	4	4	5	4	3	4	4	4	5	5	4	4
	157	4	5	5	4	4	3	4	3	4	3	4	3	3	4	4	4	4	4	4	4
	158	5	4	5	4	4	4	4	4	4	3	4	3	3	4	4	5	5	4	4	4
	159	4	5	4	4	4	4	4	4	4	4	4	4	3	4	4	2	4	5	4	4
	160	3	4	3	2	2	5	5	4	5	4	4	4	4	4	4	5	5	5	5	4
	161	2	3	3	2	2	3	4	4	4	1	2	1	3	3	3	2	3	3	4	3
	162	5	5	5	4	4	3	4	3	4	4	4	4	4	4	4	4	4	4	4	4
	163	3	3	4	3	4	3	4	3	5	4	3	4	4	4	4	3	4	4	4	4
	164	3	3	3	3	3	3	4	3	4	4	3	4	4	4	4	4	4	4	4	4
	165	3	4	4	3	4	3	3	3	3	3	4	3	4	4	3	3	4	2	3	4
	166	3	4	4	3	4	3	4	3	3	3	3	3	3	4	3	3	4	3	4	4
	167	2	3	3	3	3	3	3	3	3	3	2	3	3	3	3	3	4	3	3	3
	168	5	4	5	5	5	5	4	4	4	4	4	4	4	4	4	5	4	4	4	4
	169	3	4	5	4	4	4	4	4	4	4	4	4	3	4	4	4	4	4	4	4
	170	3	4	5	4	4	4	4	4	4	4	4	4	3	4	4	4	4	4	4	4
	171	5	5	5	5	4	3	4	3	4	4	5	4	3	4	4	4	5	5	4	4
	172	4	5	5	4	4	3	4	3	4	3	4	3	3	4	4	4	4	4	4	4
	173	5	5	5	4	5	4	4	4	4	3	4	3	4	4	4	2	3	3	4	4
	174	4	5	4	4	5	4	4	4	4	3	2	3	3	3	3	2	3	3	4	3
	175	4	4	4	4	4	5	4	4	4	4	5	4	3	4	4	4	4	4	4	4
	176	5	5	5	5	5	5	4	4	4	4	4	4	5	4	4	2	3	3	4	4
	177	5	4	5	5	5	5	4	4	4	4	4	4	4	4	4	5	4	4	4	4
	178	3	4	5	4	4	4	4	4	4	4	4	4	3	4	4	4	4	4	4	4
	179	3	4	5	4	4	4	4	4	4	4	4	4	3	4	4	4	4	4	4	4
	180	5	5	5	5	4	3	4	3	4	4	5	4	3	4	4	4	5	5	4	4
	181	5	5	5	4	4	3	4	3	4	4	4	4	4	4	4	4	4	4	4	4
	182	3	3	4	3	4	3	4	3	5	4	3	4	4	4	4	3	4	4	4	4
	183	3	3	3	3	3	3	4	3	4	4	3	4	4	4	4	4	4	4	4	4
	184	3	4	4	3	4	3	3	3	3	3	4	3	4	4	3	3	4	2	3	4
	185	3	4	4	3	4	3	4	3	3	3	3	3	3	4	3	3	4	3	4	4
	186	2	3	3	3	3	3	3	3	3	3	2	3	3	3	3	3	4	3	3	3
	187	5	4	5	5	5	5	4	4	4	4	4	4	4	4	4	5	4	4	4	4
	188	3	4	5	4	4	4	4	4	4	4	4	4	3	4	4	4	4	4	4	4
	189	3	4	5	4	4	4	4	4	4	4	4	4	3	4	4	4	4	4	4	4
	190	5	5	5	5	4	3	4	3	4	4	5	4	3	4	4	4	5	5	4	4
	191	4	5	5	4	4	3	4	3	4	3	4	3	3	4	4	4	4	4	4	4
	192	5	5	5	4	5	4	4	4	4	3	4	3	4	4	4	2	3	3	4	4
	193	4	5	4	4	5	4	4	4	4	3	2	3	3	3	3	2	3	3	4	3
	194	4	4	4	4	4	5	4	4	4	4	5	4	3	4	4	4	4	4	4	4
	195	5	5	5	5	4	3	4	3	4	4	5	4	3	4	4	4	5	5	4	4
	196	4	5	5	4	4	3	4	3	4	3	4	3	3	4	4	4	4	4	4	4
	197	5	5	5	4	5	4	4	4	4	3	4	3	4	4	4	2	3	3	4	4
	198	4	5	4	4	5	4	4	4	4	3	2	3	3	3	3	2	3	3	4	3
	199	4	4	4	4	4	5	4	4	4	4	5	4	3	4	4	4	4	4	4	4
	MV descriptives
		Mean	Median	Observed min	Observed max	Standard deviation	Excess kurtosis	Skewness	Number of observations used	Cramér-von Mises test statistic	Cramér-von Mises p value
	CW1	3.63	4	1	5	1.00155	-0.143515	-0.46726	200	1.58501	7.37e-10
	CW2	3.96	4	2	5	0.78	-0.898584	-0.12087	200	2.29235	7.37e-10
	CW3	4.145	4	2	5	0.796225	-0.591849	-0.506649	200	2.40296	7.37e-10
	CW4	3.525	4	1	5	0.921615	-0.11331	-0.305656	200	1.85329	7.37e-10
	CW5	3.8	4	1	5	0.848528	1.34092	-1.08848	200	4.65155	7.37e-10
	EE1	3.545	4	1	5	0.835449	0.8043	-0.480471	200	2.4502	7.37e-10
	EE2	3.93	4	1	5	0.612454	5.92389	-1.53894	200	7.50787	7.37e-10
	EE3	3.51	3	1	5	0.699929	0.816309	-0.123996	200	3.32892	7.37e-10
	EE4	3.8	4	1	5	0.761577	3.5874	-1.49181	200	5.73993	7.37e-10
	EE5	3.63	4	1	5	0.879261	1.06793	-0.980076	200	3.59157	7.37e-10
	HC1	3.6	4	1	5	1.02956	0.168969	-0.908474	200	3.66117	7.37e-10
	HC2	3.63	4	1	5	0.879261	1.06793	-0.980076	200	3.59157	7.37e-10
	HC3	3.52	4	1	5	0.865794	0.955145	-0.807276	200	2.76999	7.37e-10
	HC4	3.85	4	2	5	0.497494	3.36468	-1.27041	200	8.80667	7.37e-10
	HC5	3.73	4	1	5	0.697925	3.40348	-1.61754	200	6.92866	7.37e-10
	IS1	3.475	4	1	5	1.10425	-0.318831	-0.665815	200	2.24859	7.37e-10
	IS2	3.805	4	1	5	0.81054	2.1857	-1.21713	200	4.87452	7.37e-10
	IS3	3.62	4	1	5	0.992774	0.825567	-1.06222	200	3.60439	7.37e-10
	IS4	3.93	4	1	5	0.612454	5.92389	-1.53894	200	7.50787	7.37e-10
	IS5	3.85	4	2	5	0.497494	3.36468	-1.27041	200	8.80667	7.37e-10
	Indicator data (standardized)
	Matrix
	Case index	CW1	CW2	CW3	CW4	CW5	EE1	EE2	EE3	EE4	EE5	HC1	HC2	HC3	HC4	HC5	IS1	IS2	IS3	IS4	IS5
	0	1.36788	1.33333	1.07382	0.515399	1.41421	0.544617	0.114294	0.700071	0.262613	-0.716511	0.388514	-0.716511	0.554404	0.301511	0.386861	-1.33574	-0.993165	-0.624513	0.114294	0.301511
	1	0.369428	1.33333	-0.182109	0.515399	1.41421	0.544617	0.114294	0.700071	0.262613	-0.716511	-1.55406	-0.716511	-0.600604	-1.70856	-1.04596	-1.33574	-0.993165	-0.624513	0.114294	-1.70856
	2	0.369428	0.0512821	-0.182109	0.515399	0.235702	1.74158	0.114294	0.700071	0.262613	0.420808	1.3598	0.420808	-0.600604	0.301511	0.386861	0.475434	0.24058	0.382766	0.114294	0.301511
	3	1.36788	1.33333	1.07382	1.60045	1.41421	1.74158	0.114294	0.700071	0.262613	0.420808	0.388514	0.420808	1.70941	0.301511	0.386861	-1.33574	-0.993165	-0.624513	0.114294	0.301511
	4	1.36788	0.0512821	1.07382	1.60045	1.41421	1.74158	0.114294	0.700071	0.262613	0.420808	0.388514	0.420808	0.554404	0.301511	0.386861	1.38102	0.24058	0.382766	0.114294	0.301511
	5	-0.629026	0.0512821	1.07382	0.515399	0.235702	0.544617	0.114294	0.700071	0.262613	0.420808	0.388514	0.420808	-0.600604	0.301511	0.386861	0.475434	0.24058	0.382766	0.114294	0.301511
	6	-0.629026	0.0512821	1.07382	0.515399	0.235702	0.544617	0.114294	0.700071	0.262613	0.420808	0.388514	0.420808	-0.600604	0.301511	0.386861	0.475434	0.24058	0.382766	0.114294	0.301511
	7	1.36788	1.33333	1.07382	1.60045	0.235702	-0.652344	0.114294	-0.728646	0.262613	0.420808	1.3598	0.420808	-0.600604	0.301511	0.386861	0.475434	1.47433	1.39004	0.114294	0.301511
	8	0.369428	1.33333	1.07382	0.515399	0.235702	-0.652344	0.114294	-0.728646	0.262613	-0.716511	0.388514	-0.716511	-0.600604	0.301511	0.386861	0.475434	0.24058	0.382766	0.114294	0.301511
	9	1.36788	0.0512821	1.07382	0.515399	0.235702	0.544617	0.114294	0.700071	0.262613	-0.716511	0.388514	-0.716511	-0.600604	0.301511	0.386861	1.38102	1.47433	0.382766	0.114294	0.301511
	10	0.369428	1.33333	-0.182109	0.515399	0.235702	0.544617	0.114294	0.700071	0.262613	0.420808	0.388514	0.420808	-0.600604	0.301511	0.386861	-1.33574	0.24058	1.39004	0.114294	0.301511
	11	-0.629026	0.0512821	-1.43803	-1.6547	-2.12132	1.74158	1.74707	0.700071	1.57568	0.420808	0.388514	0.420808	0.554404	0.301511	0.386861	1.38102	1.47433	1.39004	1.74707	0.301511
	12	-1.62748	-1.23077	-1.43803	-1.6547	-2.12132	-0.652344	0.114294	0.700071	0.262613	-2.99115	-1.55406	-2.99115	-0.600604	-1.70856	-1.04596	-1.33574	-0.993165	-0.624513	0.114294	-1.70856
	13	1.36788	1.33333	1.07382	0.515399	0.235702	-0.652344	0.114294	-0.728646	0.262613	0.420808	0.388514	0.420808	0.554404	0.301511	0.386861	0.475434	0.24058	0.382766	0.114294	0.301511
	14	-0.629026	-1.23077	-0.182109	-0.569652	0.235702	-0.652344	0.114294	-0.728646	1.57568	0.420808	-0.582772	0.420808	0.554404	0.301511	0.386861	-0.430155	0.24058	0.382766	0.114294	0.301511
	15	-0.629026	-1.23077	-1.43803	-0.569652	-0.942809	-0.652344	0.114294	-0.728646	0.262613	0.420808	-0.582772	0.420808	0.554404	0.301511	0.386861	0.475434	0.24058	0.382766	0.114294	0.301511
	16	-0.629026	0.0512821	-0.182109	-0.569652	0.235702	-0.652344	-1.51848	-0.728646	-1.05045	-0.716511	0.388514	-0.716511	0.554404	0.301511	-1.04596	-0.430155	0.24058	-1.63179	-1.51848	0.301511
	17	-0.629026	0.0512821	-0.182109	-0.569652	0.235702	-0.652344	0.114294	-0.728646	-1.05045	-0.716511	-0.582772	-0.716511	-0.600604	0.301511	-1.04596	-0.430155	0.24058	-0.624513	0.114294	0.301511
	18	-1.62748	-1.23077	-1.43803	-0.569652	-0.942809	-0.652344	-1.51848	-0.728646	-1.05045	-0.716511	-1.55406	-0.716511	-0.600604	-1.70856	-1.04596	-0.430155	0.24058	-0.624513	-1.51848	-1.70856
	19	-1.62748	-1.23077	-1.43803	-1.6547	-2.12132	-0.652344	-1.51848	-0.728646	-1.05045	-1.85383	-1.55406	-1.85383	-1.75561	-1.70856	-2.47877	-1.33574	-3.46066	-2.63907	-1.51848	-1.70856
	20	-2.62593	-2.51282	-2.69396	-1.6547	-2.12132	-1.84931	-1.51848	-0.728646	-2.36352	-2.99115	-1.55406	-2.99115	-1.75561	-1.70856	-2.47877	-2.24133	-2.22691	-2.63907	-1.51848	-1.70856
	21	-1.62748	-1.23077	-1.43803	-1.6547	-2.12132	-0.652344	-1.51848	-0.728646	-2.36352	-1.85383	-1.55406	-1.85383	-1.75561	-1.70856	-2.47877	-1.33574	-2.22691	-1.63179	-1.51848	-1.70856
	22	-1.62748	-1.23077	-1.43803	-1.6547	-2.12132	-0.652344	-1.51848	-0.728646	-1.05045	-1.85383	-1.55406	-1.85383	-1.75561	-1.70856	-1.04596	-1.33574	-0.993165	-1.63179	-1.51848	-1.70856
	23	-1.62748	-1.23077	-1.43803	-1.6547	-2.12132	-0.652344	-1.51848	-0.728646	-1.05045	-1.85383	-1.55406	-1.85383	-1.75561	-1.70856	-1.04596	-2.24133	-2.22691	-1.63179	-1.51848	-1.70856
	24	-2.62593	-1.23077	-2.69396	-2.73975	-2.12132	-1.84931	-1.51848	-0.728646	-2.36352	-1.85383	-2.52534	-1.85383	-2.91062	-1.70856	-2.47877	-2.24133	-2.22691	-1.63179	-1.51848	-1.70856
	25	-0.629026	0.0512821	-0.182109	-0.569652	-0.942809	-0.652344	-1.51848	-0.728646	-1.05045	-0.716511	-1.55406	-0.716511	-0.600604	0.301511	-1.04596	-1.33574	-0.993165	-1.63179	-1.51848	0.301511
	26	-0.629026	-1.23077	1.07382	0.515399	0.235702	-0.652344	0.114294	-0.728646	0.262613	-0.716511	-1.55406	-0.716511	-0.600604	-1.70856	-1.04596	-1.33574	-0.993165	-1.63179	0.114294	-1.70856
	27	-1.62748	-1.23077	-1.43803	-1.6547	-0.942809	-0.652344	0.114294	-0.728646	0.262613	-0.716511	-1.55406	-0.716511	-0.600604	-1.70856	-1.04596	-1.33574	-0.993165	-0.624513	0.114294	-1.70856
	28	0.369428	-1.23077	-0.182109	-0.569652	0.235702	-0.652344	0.114294	-0.728646	0.262613	-0.716511	-1.55406	-0.716511	-0.600604	-1.70856	-1.04596	0.475434	0.24058	-0.624513	0.114294	-1.70856
	29	-0.629026	0.0512821	-0.182109	-0.569652	0.235702	-0.652344	0.114294	-0.728646	-1.05045	-0.716511	0.388514	-0.716511	0.554404	0.301511	0.386861	0.475434	0.24058	-0.624513	0.114294	0.301511
	30	-0.629026	0.0512821	-0.182109	-0.569652	0.235702	-0.652344	0.114294	-0.728646	-1.05045	-0.716511	0.388514	-0.716511	0.554404	0.301511	0.386861	-0.430155	0.24058	-0.624513	0.114294	0.301511
	31	-0.629026	-1.23077	-1.43803	-0.569652	-0.942809	-0.652344	0.114294	-0.728646	0.262613	-0.716511	0.388514	-0.716511	0.554404	0.301511	0.386861	-0.430155	0.24058	0.382766	0.114294	0.301511
	32	0.369428	0.0512821	-0.182109	-0.569652	0.235702	-0.652344	0.114294	-0.728646	-1.05045	-0.716511	0.388514	-0.716511	0.554404	0.301511	0.386861	0.475434	0.24058	0.382766	0.114294	0.301511
	33	-0.629026	-1.23077	-1.43803	-0.569652	-0.942809	-0.652344	0.114294	-0.728646	0.262613	0.420808	-0.582772	0.420808	0.554404	0.301511	0.386861	-0.430155	0.24058	0.382766	0.114294	0.301511
	34	-0.629026	-1.23077	-0.182109	-0.569652	-0.942809	-0.652344	0.114294	-0.728646	0.262613	0.420808	-0.582772	0.420808	0.554404	0.301511	0.386861	-0.430155	0.24058	0.382766	0.114294	0.301511
	35	-0.629026	-1.23077	-1.43803	-0.569652	-0.942809	-0.652344	0.114294	-0.728646	0.262613	0.420808	0.388514	0.420808	0.554404	0.301511	0.386861	-0.430155	0.24058	-1.63179	0.114294	0.301511
	36	-0.629026	-1.23077	-1.43803	-0.569652	-0.942809	-0.652344	0.114294	-0.728646	0.262613	0.420808	0.388514	0.420808	0.554404	0.301511	0.386861	-0.430155	0.24058	-1.63179	0.114294	0.301511
	37	-0.629026	-1.23077	-0.182109	-0.569652	-0.942809	-0.652344	0.114294	-0.728646	0.262613	0.420808	0.388514	0.420808	0.554404	0.301511	0.386861	-0.430155	0.24058	0.382766	0.114294	0.301511
	38	-0.629026	-1.23077	-1.43803	-0.569652	0.235702	-0.652344	0.114294	-0.728646	0.262613	0.420808	-0.582772	0.420808	-0.600604	0.301511	0.386861	-0.430155	0.24058	0.382766	0.114294	0.301511
	39	-0.629026	-1.23077	-1.43803	-0.569652	0.235702	-0.652344	0.114294	-0.728646	0.262613	0.420808	-0.582772	0.420808	0.554404	0.301511	0.386861	-0.430155	0.24058	0.382766	0.114294	0.301511
	40	-0.629026	-1.23077	-0.182109	-0.569652	0.235702	-0.652344	0.114294	-0.728646	0.262613	0.420808	0.388514	0.420808	0.554404	0.301511	0.386861	-0.430155	0.24058	0.382766	0.114294	0.301511
	41	0.369428	-1.23077	-0.182109	-0.569652	0.235702	0.544617	0.114294	-0.728646	0.262613	0.420808	0.388514	0.420808	0.554404	0.301511	0.386861	0.475434	0.24058	0.382766	0.114294	0.301511
	42	-0.629026	-1.23077	-0.182109	-0.569652	0.235702	-0.652344	0.114294	-0.728646	-1.05045	-1.85383	-0.582772	-1.85383	-0.600604	0.301511	-1.04596	0.475434	0.24058	0.382766	0.114294	0.301511
	43	0.369428	-1.23077	-0.182109	-0.569652	0.235702	-0.652344	0.114294	-0.728646	-1.05045	0.420808	0.388514	0.420808	0.554404	0.301511	0.386861	0.475434	0.24058	0.382766	0.114294	0.301511
	44	0.369428	0.0512821	-0.182109	-0.569652	0.235702	-0.652344	0.114294	-0.728646	-1.05045	0.420808	0.388514	0.420808	0.554404	0.301511	0.386861	0.475434	0.24058	0.382766	0.114294	0.301511
	45	0.369428	0.0512821	-0.182109	-0.569652	0.235702	-0.652344	0.114294	-0.728646	0.262613	0.420808	0.388514	0.420808	0.554404	0.301511	0.386861	0.475434	0.24058	0.382766	0.114294	0.301511
	46	-1.62748	-1.23077	-1.43803	-0.569652	-0.942809	-0.652344	0.114294	-0.728646	-1.05045	-0.716511	-0.582772	-0.716511	-0.600604	0.301511	-1.04596	-0.430155	0.24058	0.382766	0.114294	0.301511
	47	-0.629026	0.0512821	-0.182109	-0.569652	0.235702	0.544617	0.114294	0.700071	0.262613	0.420808	0.388514	0.420808	0.554404	0.301511	0.386861	-0.430155	0.24058	0.382766	0.114294	0.301511
	48	0.369428	-1.23077	-0.182109	-0.569652	0.235702	-1.84931	-1.51848	-0.728646	-1.05045	0.420808	0.388514	0.420808	0.554404	0.301511	0.386861	0.475434	0.24058	0.382766	-1.51848	0.301511
	49	0.369428	-1.23077	-0.182109	-0.569652	0.235702	0.544617	0.114294	-0.728646	0.262613	0.420808	0.388514	0.420808	0.554404	0.301511	0.386861	0.475434	0.24058	0.382766	0.114294	0.301511
	50	0.369428	-1.23077	-0.182109	-0.569652	0.235702	0.544617	0.114294	-0.728646	0.262613	0.420808	0.388514	0.420808	0.554404	0.301511	0.386861	0.475434	0.24058	0.382766	0.114294	0.301511
	51	0.369428	-1.23077	-0.182109	-0.569652	0.235702	0.544617	0.114294	-0.728646	0.262613	0.420808	0.388514	0.420808	0.554404	0.301511	0.386861	0.475434	0.24058	0.382766	0.114294	0.301511
	52	0.369428	-1.23077	-0.182109	-0.569652	0.235702	0.544617	0.114294	0.700071	-1.05045	0.420808	0.388514	0.420808	0.554404	0.301511	0.386861	0.475434	0.24058	0.382766	0.114294	0.301511
	53	-0.629026	-1.23077	-1.43803	-0.569652	0.235702	-0.652344	0.114294	-0.728646	0.262613	0.420808	0.388514	0.420808	0.554404	0.301511	0.386861	0.475434	0.24058	0.382766	0.114294	0.301511
	54	0.369428	-1.23077	-0.182109	-0.569652	0.235702	0.544617	0.114294	-0.728646	0.262613	0.420808	0.388514	0.420808	0.554404	0.301511	0.386861	0.475434	0.24058	0.382766	0.114294	0.301511
	55	-0.629026	-1.23077	-1.43803	-1.6547	-0.942809	-0.652344	0.114294	-0.728646	0.262613	0.420808	-0.582772	0.420808	-0.600604	0.301511	0.386861	0.475434	0.24058	0.382766	0.114294	0.301511
	56	0.369428	-1.23077	-0.182109	-0.569652	0.235702	0.544617	0.114294	-0.728646	0.262613	0.420808	0.388514	0.420808	0.554404	0.301511	0.386861	0.475434	0.24058	1.39004	0.114294	0.301511
	57	-0.629026	-1.23077	-1.43803	-0.569652	-0.942809	-0.652344	0.114294	-0.728646	0.262613	0.420808	-0.582772	0.420808	-0.600604	0.301511	0.386861	0.475434	0.24058	0.382766	0.114294	0.301511
	58	-0.629026	0.0512821	-0.182109	-0.569652	0.235702	-0.652344	0.114294	-0.728646	0.262613	0.420808	0.388514	0.420808	0.554404	0.301511	0.386861	-1.33574	-0.993165	-0.624513	0.114294	0.301511
	59	0.369428	0.0512821	-0.182109	-0.569652	0.235702	0.544617	0.114294	-0.728646	0.262613	0.420808	0.388514	0.420808	0.554404	0.301511	0.386861	-1.33574	-0.993165	-0.624513	0.114294	0.301511
	60	-0.629026	-1.23077	-1.43803	-0.569652	-0.942809	-0.652344	0.114294	-0.728646	0.262613	-0.716511	-1.55406	-0.716511	-0.600604	0.301511	0.386861	-1.33574	-0.993165	-0.624513	0.114294	0.301511
	61	0.369428	1.33333	1.07382	0.515399	0.235702	0.544617	0.114294	0.700071	-1.05045	-0.716511	-0.582772	-0.716511	-0.600604	0.301511	-1.04596	0.475434	0.24058	0.382766	0.114294	0.301511
	62	0.369428	0.0512821	-0.182109	-0.569652	0.235702	0.544617	0.114294	0.700071	0.262613	0.420808	0.388514	0.420808	0.554404	0.301511	0.386861	0.475434	0.24058	0.382766	0.114294	0.301511
	63	0.369428	0.0512821	-0.182109	-0.569652	0.235702	0.544617	0.114294	-0.728646	0.262613	0.420808	0.388514	0.420808	0.554404	0.301511	0.386861	0.475434	0.24058	0.382766	0.114294	0.301511
	64	0.369428	0.0512821	-0.182109	0.515399	0.235702	0.544617	0.114294	-0.728646	0.262613	0.420808	0.388514	0.420808	0.554404	0.301511	0.386861	0.475434	0.24058	0.382766	0.114294	0.301511
	65	0.369428	0.0512821	-0.182109	0.515399	0.235702	-0.652344	0.114294	-0.728646	0.262613	0.420808	0.388514	0.420808	0.554404	0.301511	0.386861	0.475434	0.24058	0.382766	0.114294	0.301511
	66	-0.629026	-1.23077	-0.182109	-0.569652	0.235702	0.544617	0.114294	-0.728646	0.262613	0.420808	0.388514	0.420808	0.554404	0.301511	0.386861	-0.430155	0.24058	1.39004	0.114294	0.301511
	67	0.369428	0.0512821	-0.182109	-0.569652	0.235702	0.544617	0.114294	0.700071	0.262613	0.420808	0.388514	0.420808	0.554404	0.301511	0.386861	0.475434	0.24058	0.382766	0.114294	0.301511
	68	0.369428	0.0512821	1.07382	0.515399	0.235702	0.544617	0.114294	0.700071	0.262613	0.420808	0.388514	0.420808	0.554404	0.301511	0.386861	0.475434	0.24058	0.382766	0.114294	0.301511
	69	0.369428	0.0512821	1.07382	0.515399	0.235702	0.544617	0.114294	0.700071	0.262613	0.420808	-0.582772	0.420808	0.554404	0.301511	0.386861	0.475434	0.24058	0.382766	0.114294	0.301511
	70	-0.629026	0.0512821	-0.182109	0.515399	0.235702	0.544617	0.114294	0.700071	0.262613	0.420808	0.388514	0.420808	0.554404	0.301511	0.386861	0.475434	0.24058	0.382766	0.114294	0.301511
	71	0.369428	1.33333	-0.182109	0.515399	0.235702	0.544617	0.114294	0.700071	0.262613	0.420808	-0.582772	0.420808	0.554404	0.301511	0.386861	-0.430155	0.24058	0.382766	0.114294	0.301511
	72	0.369428	1.33333	1.07382	0.515399	0.235702	0.544617	0.114294	2.12879	1.57568	-0.716511	-0.582772	-0.716511	0.554404	0.301511	0.386861	-0.430155	0.24058	0.382766	0.114294	0.301511
	73	0.369428	0.0512821	1.07382	1.60045	0.235702	0.544617	0.114294	0.700071	0.262613	1.55813	-0.582772	1.55813	0.554404	0.301511	0.386861	0.475434	0.24058	0.382766	0.114294	0.301511
	74	0.369428	0.0512821	1.07382	1.60045	0.235702	0.544617	0.114294	0.700071	0.262613	0.420808	0.388514	0.420808	0.554404	0.301511	1.81968	0.475434	0.24058	0.382766	0.114294	0.301511
	75	0.369428	0.0512821	1.07382	0.515399	0.235702	-0.652344	0.114294	-0.728646	0.262613	0.420808	0.388514	0.420808	0.554404	0.301511	0.386861	0.475434	0.24058	0.382766	0.114294	0.301511
	76	0.369428	0.0512821	1.07382	0.515399	0.235702	0.544617	0.114294	0.700071	0.262613	0.420808	0.388514	0.420808	0.554404	0.301511	0.386861	0.475434	0.24058	0.382766	0.114294	0.301511
	77	1.36788	1.33333	1.07382	0.515399	1.41421	0.544617	0.114294	0.700071	0.262613	0.420808	0.388514	0.420808	0.554404	0.301511	0.386861	0.475434	0.24058	0.382766	0.114294	0.301511
	78	-2.62593	-1.23077	-1.43803	-2.73975	-3.29983	-1.84931	-1.51848	-0.728646	-1.05045	-1.85383	-2.52534	-1.85383	-2.91062	-3.71864	-3.91159	-2.24133	-3.46066	-2.63907	-1.51848	-3.71864
	79	-0.629026	-1.23077	-1.43803	-1.6547	-2.12132	-0.652344	0.114294	-0.728646	0.262613	-2.99115	-2.52534	-2.99115	-2.91062	-1.70856	-1.04596	-2.24133	-2.22691	-2.63907	0.114294	-1.70856
	80	-1.62748	-1.23077	-1.43803	-1.6547	-2.12132	-1.84931	-1.51848	-0.728646	-2.36352	-2.99115	-2.52534	-2.99115	-1.75561	0.301511	-1.04596	-2.24133	-2.22691	-2.63907	-1.51848	0.301511
	81	-1.62748	-1.23077	-1.43803	-2.73975	-3.29983	-3.04627	-3.15126	-2.15736	-2.36352	-2.99115	-2.52534	-2.99115	-2.91062	-3.71864	-3.91159	-2.24133	-2.22691	-2.63907	-3.15126	-3.71864
	82	-2.62593	-1.23077	-2.69396	-2.73975	-3.29983	-1.84931	-1.51848	-0.728646	-2.36352	-1.85383	-2.52534	-1.85383	-2.91062	-3.71864	-3.91159	-2.24133	-3.46066	-2.63907	-1.51848	-3.71864
	83	0.369428	0.0512821	-1.43803	-1.6547	-2.12132	-1.84931	-4.78403	-3.58608	-2.36352	-1.85383	-2.52534	-1.85383	-0.600604	0.301511	-1.04596	-0.430155	-2.22691	-1.63179	-4.78403	0.301511
	84	-0.629026	0.0512821	-1.43803	-1.6547	-2.12132	-3.04627	-3.15126	-0.728646	-1.05045	-1.85383	-2.52534	-1.85383	-0.600604	-1.70856	-2.47877	-0.430155	0.24058	-1.63179	-3.15126	-1.70856
	85	-1.62748	-1.23077	-1.43803	-1.6547	-2.12132	-3.04627	-3.15126	-2.15736	-3.67658	-1.85383	-1.55406	-1.85383	-2.91062	-1.70856	-2.47877	-2.24133	-2.22691	-2.63907	-3.15126	-1.70856
	86	-2.62593	-2.51282	-1.43803	-1.6547	-0.942809	-3.04627	-1.51848	-2.15736	-3.67658	-1.85383	-1.55406	-1.85383	-2.91062	-1.70856	-2.47877	-2.24133	-2.22691	-2.63907	-1.51848	-1.70856
	87	-2.62593	-2.51282	-2.69396	-1.6547	-0.942809	-1.84931	-1.51848	-2.15736	-3.67658	-1.85383	-1.55406	-1.85383	-1.75561	-1.70856	-2.47877	-2.24133	-2.22691	-2.63907	-1.51848	-1.70856
	88	-1.62748	-1.23077	-0.182109	-1.6547	-0.942809	-1.84931	-4.78403	-3.58608	-3.67658	-1.85383	-1.55406	-1.85383	-1.75561	-1.70856	-2.47877	-2.24133	-3.46066	-2.63907	-4.78403	-1.70856
	89	-1.62748	-1.23077	-1.43803	-1.6547	-2.12132	-3.04627	-3.15126	-2.15736	-3.67658	-1.85383	-2.52534	-1.85383	-1.75561	-1.70856	-2.47877	-2.24133	-2.22691	-1.63179	-3.15126	-1.70856
	90	-0.629026	0.0512821	-0.182109	-0.569652	-2.12132	-0.652344	-1.51848	-0.728646	-1.05045	-1.85383	-1.55406	-1.85383	-1.75561	-1.70856	-2.47877	-0.430155	0.24058	-1.63179	-1.51848	-1.70856
	91	-1.62748	-1.23077	-1.43803	-0.569652	-2.12132	-0.652344	-1.51848	-0.728646	-1.05045	-0.716511	-1.55406	-0.716511	-1.75561	-1.70856	-1.04596	-0.430155	0.24058	-1.63179	-1.51848	-1.70856
	92	-1.62748	-1.23077	-1.43803	-0.569652	-0.942809	-0.652344	0.114294	-0.728646	0.262613	-0.716511	-1.55406	-0.716511	-1.75561	-1.70856	-1.04596	-0.430155	0.24058	-1.63179	0.114294	-1.70856
	93	0.369428	1.33333	1.07382	1.60045	0.235702	1.74158	1.74707	0.700071	0.262613	0.420808	1.3598	0.420808	0.554404	0.301511	0.386861	1.38102	1.47433	1.39004	1.74707	0.301511
	94	-0.629026	-1.23077	-1.43803	-0.569652	-0.942809	-0.652344	0.114294	-0.728646	0.262613	0.420808	0.388514	0.420808	0.554404	0.301511	0.386861	0.475434	0.24058	0.382766	0.114294	0.301511
	95	-0.629026	-1.23077	-1.43803	-0.569652	-0.942809	-0.652344	0.114294	-0.728646	0.262613	0.420808	0.388514	0.420808	0.554404	0.301511	0.386861	0.475434	0.24058	0.382766	0.114294	0.301511
	96	0.369428	0.0512821	-0.182109	-0.569652	0.235702	0.544617	0.114294	0.700071	0.262613	0.420808	0.388514	0.420808	0.554404	0.301511	0.386861	0.475434	0.24058	0.382766	0.114294	0.301511
	97	0.369428	0.0512821	-0.182109	-0.569652	0.235702	0.544617	0.114294	0.700071	0.262613	0.420808	0.388514	0.420808	0.554404	0.301511	0.386861	0.475434	0.24058	1.39004	0.114294	0.301511
	98	0.369428	0.0512821	-0.182109	-0.569652	0.235702	-0.652344	0.114294	-0.728646	-1.05045	0.420808	0.388514	0.420808	0.554404	0.301511	0.386861	0.475434	0.24058	0.382766	0.114294	0.301511
	99	0.369428	0.0512821	-0.182109	-0.569652	0.235702	-0.652344	0.114294	-0.728646	0.262613	0.420808	1.3598	0.420808	0.554404	0.301511	0.386861	0.475434	0.24058	0.382766	0.114294	0.301511
	100	0.369428	0.0512821	-0.182109	-0.569652	0.235702	0.544617	0.114294	0.700071	0.262613	1.55813	1.3598	1.55813	0.554404	0.301511	0.386861	0.475434	0.24058	0.382766	0.114294	0.301511
	101	0.369428	0.0512821	-0.182109	0.515399	0.235702	-0.652344	0.114294	-0.728646	-1.05045	1.55813	0.388514	1.55813	0.554404	0.301511	0.386861	0.475434	0.24058	0.382766	0.114294	0.301511
	102	0.369428	0.0512821	-0.182109	0.515399	0.235702	0.544617	0.114294	0.700071	0.262613	1.55813	1.3598	1.55813	0.554404	0.301511	0.386861	0.475434	0.24058	0.382766	0.114294	0.301511
	103	0.369428	0.0512821	-0.182109	0.515399	0.235702	0.544617	0.114294	0.700071	0.262613	0.420808	0.388514	0.420808	0.554404	0.301511	0.386861	0.475434	0.24058	0.382766	0.114294	0.301511
	104	-0.629026	0.0512821	-0.182109	-0.569652	0.235702	0.544617	1.74707	0.700071	0.262613	1.55813	1.3598	1.55813	0.554404	0.301511	0.386861	0.475434	0.24058	0.382766	1.74707	0.301511
	105	-0.629026	0.0512821	-0.182109	-0.569652	0.235702	0.544617	1.74707	0.700071	0.262613	1.55813	0.388514	1.55813	0.554404	0.301511	0.386861	0.475434	0.24058	0.382766	1.74707	0.301511
	106	0.369428	1.33333	1.07382	0.515399	0.235702	0.544617	0.114294	0.700071	0.262613	0.420808	0.388514	0.420808	1.70941	0.301511	0.386861	0.475434	0.24058	1.39004	0.114294	0.301511
	107	-0.629026	0.0512821	-0.182109	-0.569652	0.235702	0.544617	0.114294	0.700071	0.262613	1.55813	0.388514	1.55813	0.554404	0.301511	0.386861	0.475434	0.24058	0.382766	0.114294	0.301511
	108	0.369428	0.0512821	-0.182109	0.515399	0.235702	0.544617	0.114294	0.700071	0.262613	0.420808	0.388514	0.420808	0.554404	0.301511	0.386861	0.475434	0.24058	0.382766	0.114294	0.301511
	109	0.369428	0.0512821	-0.182109	0.515399	0.235702	0.544617	1.74707	2.12879	1.57568	1.55813	1.3598	1.55813	0.554404	0.301511	0.386861	1.38102	1.47433	0.382766	1.74707	0.301511
	110	0.369428	0.0512821	-0.182109	0.515399	0.235702	-0.652344	0.114294	-0.728646	0.262613	0.420808	0.388514	0.420808	1.70941	0.301511	0.386861	1.38102	0.24058	-0.624513	0.114294	0.301511
	111	0.369428	1.33333	1.07382	0.515399	1.41421	0.544617	0.114294	0.700071	0.262613	0.420808	0.388514	0.420808	1.70941	0.301511	0.386861	1.38102	1.47433	1.39004	0.114294	0.301511
	112	-0.629026	0.0512821	-0.182109	-0.569652	0.235702	0.544617	1.74707	0.700071	0.262613	0.420808	0.388514	0.420808	-1.75561	0.301511	0.386861	0.475434	0.24058	0.382766	1.74707	0.301511
	113	0.369428	0.0512821	1.07382	0.515399	0.235702	0.544617	1.74707	2.12879	1.57568	-0.716511	-0.582772	-0.716511	-0.600604	0.301511	-1.04596	0.475434	0.24058	0.382766	1.74707	0.301511
	114	0.369428	0.0512821	1.07382	0.515399	0.235702	0.544617	0.114294	-0.728646	0.262613	0.420808	0.388514	0.420808	0.554404	0.301511	0.386861	0.475434	0.24058	0.382766	0.114294	0.301511
	115	1.36788	1.33333	1.07382	0.515399	0.235702	-0.652344	1.74707	0.700071	1.57568	1.55813	1.3598	1.55813	1.70941	0.301511	0.386861	1.38102	0.24058	0.382766	1.74707	0.301511
	116	0.369428	0.0512821	1.07382	0.515399	0.235702	0.544617	0.114294	0.700071	0.262613	1.55813	0.388514	1.55813	0.554404	0.301511	0.386861	1.38102	0.24058	0.382766	0.114294	0.301511
	117	0.369428	1.33333	1.07382	0.515399	1.41421	0.544617	0.114294	0.700071	0.262613	0.420808	0.388514	0.420808	0.554404	0.301511	0.386861	1.38102	0.24058	0.382766	0.114294	0.301511
	118	0.369428	1.33333	1.07382	0.515399	0.235702	0.544617	1.74707	2.12879	1.57568	1.55813	1.3598	1.55813	0.554404	2.31159	1.81968	1.38102	0.24058	0.382766	1.74707	2.31159
	119	0.369428	1.33333	1.07382	0.515399	0.235702	0.544617	1.74707	2.12879	1.57568	1.55813	1.3598	1.55813	1.70941	2.31159	1.81968	1.38102	0.24058	0.382766	1.74707	2.31159
	120	1.36788	1.33333	1.07382	0.515399	0.235702	0.544617	1.74707	0.700071	1.57568	1.55813	1.3598	1.55813	1.70941	2.31159	1.81968	0.475434	0.24058	0.382766	1.74707	2.31159
	121	-0.629026	0.0512821	-0.182109	-0.569652	0.235702	0.544617	0.114294	0.700071	0.262613	0.420808	0.388514	0.420808	0.554404	0.301511	0.386861	0.475434	0.24058	0.382766	0.114294	0.301511
	122	0.369428	0.0512821	-0.182109	1.60045	0.235702	-0.652344	0.114294	-0.728646	-1.05045	1.55813	1.3598	1.55813	1.70941	0.301511	1.81968	-0.430155	-0.993165	0.382766	0.114294	0.301511
	123	1.36788	1.33333	1.07382	1.60045	1.41421	0.544617	0.114294	-0.728646	0.262613	0.420808	0.388514	0.420808	0.554404	0.301511	0.386861	1.38102	0.24058	0.382766	0.114294	0.301511
	124	-0.629026	0.0512821	1.07382	0.515399	0.235702	-0.652344	0.114294	-0.728646	0.262613	0.420808	0.388514	0.420808	1.70941	2.31159	1.81968	-0.430155	-0.993165	-0.624513	0.114294	2.31159
	125	0.369428	1.33333	-0.182109	-0.569652	0.235702	-0.652344	0.114294	-0.728646	-1.05045	0.420808	0.388514	0.420808	1.70941	2.31159	1.81968	-0.430155	-0.993165	-0.624513	0.114294	2.31159
	126	1.36788	1.33333	1.07382	0.515399	0.235702	0.544617	0.114294	0.700071	0.262613	0.420808	0.388514	0.420808	1.70941	2.31159	1.81968	1.38102	1.47433	1.39004	0.114294	2.31159
	127	1.36788	0.0512821	-0.182109	-0.569652	0.235702	0.544617	1.74707	2.12879	1.57568	0.420808	0.388514	0.420808	-0.600604	0.301511	0.386861	1.38102	1.47433	0.382766	1.74707	0.301511
	128	0.369428	0.0512821	-0.182109	-0.569652	0.235702	0.544617	1.74707	2.12879	1.57568	0.420808	0.388514	0.420808	0.554404	-3.71864	0.386861	1.38102	1.47433	1.39004	1.74707	-3.71864
	129	1.36788	0.0512821	-0.182109	-0.569652	0.235702	0.544617	1.74707	2.12879	1.57568	0.420808	0.388514	0.420808	0.554404	0.301511	0.386861	0.475434	1.47433	1.39004	1.74707	0.301511
	130	-0.629026	0.0512821	1.07382	0.515399	0.235702	0.544617	0.114294	2.12879	1.57568	1.55813	1.3598	1.55813	0.554404	0.301511	0.386861	1.38102	1.47433	0.382766	0.114294	0.301511
	131	-0.629026	0.0512821	-0.182109	1.60045	0.235702	0.544617	0.114294	0.700071	0.262613	0.420808	0.388514	0.420808	1.70941	0.301511	0.386861	0.475434	1.47433	1.39004	0.114294	0.301511
	132	0.369428	1.33333	1.07382	0.515399	0.235702	0.544617	1.74707	2.12879	1.57568	1.55813	0.388514	1.55813	0.554404	0.301511	0.386861	1.38102	1.47433	1.39004	1.74707	0.301511
	133	1.36788	0.0512821	-0.182109	0.515399	0.235702	0.544617	0.114294	0.700071	0.262613	0.420808	0.388514	0.420808	0.554404	2.31159	0.386861	-0.430155	-0.993165	0.382766	0.114294	2.31159
	134	1.36788	0.0512821	-0.182109	0.515399	0.235702	0.544617	1.74707	2.12879	1.57568	1.55813	-0.582772	1.55813	-0.600604	0.301511	0.386861	1.38102	1.47433	1.39004	1.74707	0.301511
	135	1.36788	1.33333	1.07382	1.60045	1.41421	0.544617	1.74707	2.12879	1.57568	0.420808	0.388514	0.420808	1.70941	0.301511	0.386861	1.38102	1.47433	0.382766	1.74707	0.301511
	136	0.369428	0.0512821	-0.182109	1.60045	1.41421	0.544617	1.74707	2.12879	1.57568	0.420808	0.388514	0.420808	0.554404	0.301511	0.386861	1.38102	1.47433	1.39004	1.74707	0.301511
	137	1.36788	1.33333	1.07382	1.60045	0.235702	1.74158	1.74707	0.700071	0.262613	1.55813	1.3598	1.55813	0.554404	2.31159	1.81968	1.38102	1.47433	1.39004	1.74707	2.31159
	138	1.36788	1.33333	1.07382	1.60045	0.235702	1.74158	1.74707	0.700071	0.262613	1.55813	1.3598	1.55813	0.554404	0.301511	0.386861	0.475434	1.47433	0.382766	1.74707	0.301511
	139	1.36788	1.33333	1.07382	1.60045	1.41421	0.544617	0.114294	0.700071	0.262613	1.55813	0.388514	1.55813	0.554404	0.301511	0.386861	-0.430155	0.24058	0.382766	0.114294	0.301511
	140	1.36788	1.33333	1.07382	0.515399	1.41421	0.544617	0.114294	0.700071	0.262613	-0.716511	0.388514	-0.716511	0.554404	0.301511	0.386861	-1.33574	-0.993165	-0.624513	0.114294	0.301511
	141	0.369428	1.33333	-0.182109	0.515399	1.41421	0.544617	0.114294	0.700071	0.262613	-0.716511	-1.55406	-0.716511	-0.600604	-1.70856	-1.04596	-1.33574	-0.993165	-0.624513	0.114294	-1.70856
	142	0.369428	0.0512821	-0.182109	0.515399	0.235702	1.74158	0.114294	0.700071	0.262613	0.420808	1.3598	0.420808	-0.600604	0.301511	0.386861	0.475434	0.24058	0.382766	0.114294	0.301511
	143	1.36788	1.33333	1.07382	1.60045	1.41421	1.74158	0.114294	0.700071	0.262613	0.420808	0.388514	0.420808	1.70941	0.301511	0.386861	-1.33574	-0.993165	-0.624513	0.114294	0.301511
	144	1.36788	0.0512821	1.07382	1.60045	1.41421	1.74158	0.114294	0.700071	0.262613	0.420808	0.388514	0.420808	0.554404	0.301511	0.386861	1.38102	0.24058	0.382766	0.114294	0.301511
	145	-0.629026	0.0512821	1.07382	0.515399	0.235702	0.544617	0.114294	0.700071	0.262613	0.420808	0.388514	0.420808	-0.600604	0.301511	0.386861	0.475434	0.24058	0.382766	0.114294	0.301511
	146	-0.629026	0.0512821	1.07382	0.515399	0.235702	0.544617	0.114294	0.700071	0.262613	0.420808	0.388514	0.420808	-0.600604	0.301511	0.386861	0.475434	0.24058	0.382766	0.114294	0.301511
	147	1.36788	1.33333	1.07382	1.60045	0.235702	-0.652344	0.114294	-0.728646	0.262613	0.420808	1.3598	0.420808	-0.600604	0.301511	0.386861	0.475434	1.47433	1.39004	0.114294	0.301511
	148	0.369428	1.33333	1.07382	0.515399	0.235702	-0.652344	0.114294	-0.728646	0.262613	-0.716511	0.388514	-0.716511	-0.600604	0.301511	0.386861	0.475434	0.24058	0.382766	0.114294	0.301511
	149	1.36788	1.33333	1.07382	0.515399	1.41421	0.544617	0.114294	0.700071	0.262613	-0.716511	0.388514	-0.716511	0.554404	0.301511	0.386861	-1.33574	-0.993165	-0.624513	0.114294	0.301511
	150	0.369428	1.33333	-0.182109	0.515399	1.41421	0.544617	0.114294	0.700071	0.262613	-0.716511	-1.55406	-0.716511	-0.600604	-1.70856	-1.04596	-1.33574	-0.993165	-0.624513	0.114294	-1.70856
	151	0.369428	0.0512821	-0.182109	0.515399	0.235702	1.74158	0.114294	0.700071	0.262613	0.420808	1.3598	0.420808	-0.600604	0.301511	0.386861	0.475434	0.24058	0.382766	0.114294	0.301511
	152	1.36788	1.33333	1.07382	1.60045	1.41421	1.74158	0.114294	0.700071	0.262613	0.420808	0.388514	0.420808	1.70941	0.301511	0.386861	-1.33574	-0.993165	-0.624513	0.114294	0.301511
	153	1.36788	0.0512821	1.07382	1.60045	1.41421	1.74158	0.114294	0.700071	0.262613	0.420808	0.388514	0.420808	0.554404	0.301511	0.386861	1.38102	0.24058	0.382766	0.114294	0.301511
	154	-0.629026	0.0512821	1.07382	0.515399	0.235702	0.544617	0.114294	0.700071	0.262613	0.420808	0.388514	0.420808	-0.600604	0.301511	0.386861	0.475434	0.24058	0.382766	0.114294	0.301511
	155	-0.629026	0.0512821	1.07382	0.515399	0.235702	0.544617	0.114294	0.700071	0.262613	0.420808	0.388514	0.420808	-0.600604	0.301511	0.386861	0.475434	0.24058	0.382766	0.114294	0.301511
	156	1.36788	1.33333	1.07382	1.60045	0.235702	-0.652344	0.114294	-0.728646	0.262613	0.420808	1.3598	0.420808	-0.600604	0.301511	0.386861	0.475434	1.47433	1.39004	0.114294	0.301511
	157	0.369428	1.33333	1.07382	0.515399	0.235702	-0.652344	0.114294	-0.728646	0.262613	-0.716511	0.388514	-0.716511	-0.600604	0.301511	0.386861	0.475434	0.24058	0.382766	0.114294	0.301511
	158	1.36788	0.0512821	1.07382	0.515399	0.235702	0.544617	0.114294	0.700071	0.262613	-0.716511	0.388514	-0.716511	-0.600604	0.301511	0.386861	1.38102	1.47433	0.382766	0.114294	0.301511
	159	0.369428	1.33333	-0.182109	0.515399	0.235702	0.544617	0.114294	0.700071	0.262613	0.420808	0.388514	0.420808	-0.600604	0.301511	0.386861	-1.33574	0.24058	1.39004	0.114294	0.301511
	160	-0.629026	0.0512821	-1.43803	-1.6547	-2.12132	1.74158	1.74707	0.700071	1.57568	0.420808	0.388514	0.420808	0.554404	0.301511	0.386861	1.38102	1.47433	1.39004	1.74707	0.301511
	161	-1.62748	-1.23077	-1.43803	-1.6547	-2.12132	-0.652344	0.114294	0.700071	0.262613	-2.99115	-1.55406	-2.99115	-0.600604	-1.70856	-1.04596	-1.33574	-0.993165	-0.624513	0.114294	-1.70856
	162	1.36788	1.33333	1.07382	0.515399	0.235702	-0.652344	0.114294	-0.728646	0.262613	0.420808	0.388514	0.420808	0.554404	0.301511	0.386861	0.475434	0.24058	0.382766	0.114294	0.301511
	163	-0.629026	-1.23077	-0.182109	-0.569652	0.235702	-0.652344	0.114294	-0.728646	1.57568	0.420808	-0.582772	0.420808	0.554404	0.301511	0.386861	-0.430155	0.24058	0.382766	0.114294	0.301511
	164	-0.629026	-1.23077	-1.43803	-0.569652	-0.942809	-0.652344	0.114294	-0.728646	0.262613	0.420808	-0.582772	0.420808	0.554404	0.301511	0.386861	0.475434	0.24058	0.382766	0.114294	0.301511
	165	-0.629026	0.0512821	-0.182109	-0.569652	0.235702	-0.652344	-1.51848	-0.728646	-1.05045	-0.716511	0.388514	-0.716511	0.554404	0.301511	-1.04596	-0.430155	0.24058	-1.63179	-1.51848	0.301511
	166	-0.629026	0.0512821	-0.182109	-0.569652	0.235702	-0.652344	0.114294	-0.728646	-1.05045	-0.716511	-0.582772	-0.716511	-0.600604	0.301511	-1.04596	-0.430155	0.24058	-0.624513	0.114294	0.301511
	167	-1.62748	-1.23077	-1.43803	-0.569652	-0.942809	-0.652344	-1.51848	-0.728646	-1.05045	-0.716511	-1.55406	-0.716511	-0.600604	-1.70856	-1.04596	-0.430155	0.24058	-0.624513	-1.51848	-1.70856
	168	1.36788	0.0512821	1.07382	1.60045	1.41421	1.74158	0.114294	0.700071	0.262613	0.420808	0.388514	0.420808	0.554404	0.301511	0.386861	1.38102	0.24058	0.382766	0.114294	0.301511
	169	-0.629026	0.0512821	1.07382	0.515399	0.235702	0.544617	0.114294	0.700071	0.262613	0.420808	0.388514	0.420808	-0.600604	0.301511	0.386861	0.475434	0.24058	0.382766	0.114294	0.301511
	170	-0.629026	0.0512821	1.07382	0.515399	0.235702	0.544617	0.114294	0.700071	0.262613	0.420808	0.388514	0.420808	-0.600604	0.301511	0.386861	0.475434	0.24058	0.382766	0.114294	0.301511
	171	1.36788	1.33333	1.07382	1.60045	0.235702	-0.652344	0.114294	-0.728646	0.262613	0.420808	1.3598	0.420808	-0.600604	0.301511	0.386861	0.475434	1.47433	1.39004	0.114294	0.301511
	172	0.369428	1.33333	1.07382	0.515399	0.235702	-0.652344	0.114294	-0.728646	0.262613	-0.716511	0.388514	-0.716511	-0.600604	0.301511	0.386861	0.475434	0.24058	0.382766	0.114294	0.301511
	173	1.36788	1.33333	1.07382	0.515399	1.41421	0.544617	0.114294	0.700071	0.262613	-0.716511	0.388514	-0.716511	0.554404	0.301511	0.386861	-1.33574	-0.993165	-0.624513	0.114294	0.301511
	174	0.369428	1.33333	-0.182109	0.515399	1.41421	0.544617	0.114294	0.700071	0.262613	-0.716511	-1.55406	-0.716511	-0.600604	-1.70856	-1.04596	-1.33574	-0.993165	-0.624513	0.114294	-1.70856
	175	0.369428	0.0512821	-0.182109	0.515399	0.235702	1.74158	0.114294	0.700071	0.262613	0.420808	1.3598	0.420808	-0.600604	0.301511	0.386861	0.475434	0.24058	0.382766	0.114294	0.301511
	176	1.36788	1.33333	1.07382	1.60045	1.41421	1.74158	0.114294	0.700071	0.262613	0.420808	0.388514	0.420808	1.70941	0.301511	0.386861	-1.33574	-0.993165	-0.624513	0.114294	0.301511
	177	1.36788	0.0512821	1.07382	1.60045	1.41421	1.74158	0.114294	0.700071	0.262613	0.420808	0.388514	0.420808	0.554404	0.301511	0.386861	1.38102	0.24058	0.382766	0.114294	0.301511
	178	-0.629026	0.0512821	1.07382	0.515399	0.235702	0.544617	0.114294	0.700071	0.262613	0.420808	0.388514	0.420808	-0.600604	0.301511	0.386861	0.475434	0.24058	0.382766	0.114294	0.301511
	179	-0.629026	0.0512821	1.07382	0.515399	0.235702	0.544617	0.114294	0.700071	0.262613	0.420808	0.388514	0.420808	-0.600604	0.301511	0.386861	0.475434	0.24058	0.382766	0.114294	0.301511
	180	1.36788	1.33333	1.07382	1.60045	0.235702	-0.652344	0.114294	-0.728646	0.262613	0.420808	1.3598	0.420808	-0.600604	0.301511	0.386861	0.475434	1.47433	1.39004	0.114294	0.301511
	181	1.36788	1.33333	1.07382	0.515399	0.235702	-0.652344	0.114294	-0.728646	0.262613	0.420808	0.388514	0.420808	0.554404	0.301511	0.386861	0.475434	0.24058	0.382766	0.114294	0.301511
	182	-0.629026	-1.23077	-0.182109	-0.569652	0.235702	-0.652344	0.114294	-0.728646	1.57568	0.420808	-0.582772	0.420808	0.554404	0.301511	0.386861	-0.430155	0.24058	0.382766	0.114294	0.301511
	183	-0.629026	-1.23077	-1.43803	-0.569652	-0.942809	-0.652344	0.114294	-0.728646	0.262613	0.420808	-0.582772	0.420808	0.554404	0.301511	0.386861	0.475434	0.24058	0.382766	0.114294	0.301511
	184	-0.629026	0.0512821	-0.182109	-0.569652	0.235702	-0.652344	-1.51848	-0.728646	-1.05045	-0.716511	0.388514	-0.716511	0.554404	0.301511	-1.04596	-0.430155	0.24058	-1.63179	-1.51848	0.301511
	185	-0.629026	0.0512821	-0.182109	-0.569652	0.235702	-0.652344	0.114294	-0.728646	-1.05045	-0.716511	-0.582772	-0.716511	-0.600604	0.301511	-1.04596	-0.430155	0.24058	-0.624513	0.114294	0.301511
	186	-1.62748	-1.23077	-1.43803	-0.569652	-0.942809	-0.652344	-1.51848	-0.728646	-1.05045	-0.716511	-1.55406	-0.716511	-0.600604	-1.70856	-1.04596	-0.430155	0.24058	-0.624513	-1.51848	-1.70856
	187	1.36788	0.0512821	1.07382	1.60045	1.41421	1.74158	0.114294	0.700071	0.262613	0.420808	0.388514	0.420808	0.554404	0.301511	0.386861	1.38102	0.24058	0.382766	0.114294	0.301511
	188	-0.629026	0.0512821	1.07382	0.515399	0.235702	0.544617	0.114294	0.700071	0.262613	0.420808	0.388514	0.420808	-0.600604	0.301511	0.386861	0.475434	0.24058	0.382766	0.114294	0.301511
	189	-0.629026	0.0512821	1.07382	0.515399	0.235702	0.544617	0.114294	0.700071	0.262613	0.420808	0.388514	0.420808	-0.600604	0.301511	0.386861	0.475434	0.24058	0.382766	0.114294	0.301511
	190	1.36788	1.33333	1.07382	1.60045	0.235702	-0.652344	0.114294	-0.728646	0.262613	0.420808	1.3598	0.420808	-0.600604	0.301511	0.386861	0.475434	1.47433	1.39004	0.114294	0.301511
	191	0.369428	1.33333	1.07382	0.515399	0.235702	-0.652344	0.114294	-0.728646	0.262613	-0.716511	0.388514	-0.716511	-0.600604	0.301511	0.386861	0.475434	0.24058	0.382766	0.114294	0.301511
	192	1.36788	1.33333	1.07382	0.515399	1.41421	0.544617	0.114294	0.700071	0.262613	-0.716511	0.388514	-0.716511	0.554404	0.301511	0.386861	-1.33574	-0.993165	-0.624513	0.114294	0.301511
	193	0.369428	1.33333	-0.182109	0.515399	1.41421	0.544617	0.114294	0.700071	0.262613	-0.716511	-1.55406	-0.716511	-0.600604	-1.70856	-1.04596	-1.33574	-0.993165	-0.624513	0.114294	-1.70856
	194	0.369428	0.0512821	-0.182109	0.515399	0.235702	1.74158	0.114294	0.700071	0.262613	0.420808	1.3598	0.420808	-0.600604	0.301511	0.386861	0.475434	0.24058	0.382766	0.114294	0.301511
	195	1.36788	1.33333	1.07382	1.60045	0.235702	-0.652344	0.114294	-0.728646	0.262613	0.420808	1.3598	0.420808	-0.600604	0.301511	0.386861	0.475434	1.47433	1.39004	0.114294	0.301511
	196	0.369428	1.33333	1.07382	0.515399	0.235702	-0.652344	0.114294	-0.728646	0.262613	-0.716511	0.388514	-0.716511	-0.600604	0.301511	0.386861	0.475434	0.24058	0.382766	0.114294	0.301511
	197	1.36788	1.33333	1.07382	0.515399	1.41421	0.544617	0.114294	0.700071	0.262613	-0.716511	0.388514	-0.716511	0.554404	0.301511	0.386861	-1.33574	-0.993165	-0.624513	0.114294	0.301511
	198	0.369428	1.33333	-0.182109	0.515399	1.41421	0.544617	0.114294	0.700071	0.262613	-0.716511	-1.55406	-0.716511	-0.600604	-1.70856	-1.04596	-1.33574	-0.993165	-0.624513	0.114294	-1.70856
	199	0.369428	0.0512821	-0.182109	0.515399	0.235702	1.74158	0.114294	0.700071	0.262613	0.420808	1.3598	0.420808	-0.600604	0.301511	0.386861	0.475434	0.24058	0.382766	0.114294	0.301511

## Sheet: complete Charts
	SmartPLS report
	Please cite the use of SmartPLS: Ringle, C. M., Wende, S., and Becker, J.-M. 2024. "SmartPLS 4." Bönningstedt: SmartPLS, https://www.smartpls.com.
