# Supplementary material for: Entrepreneurship Education as a Catalyst for Community Welfare: An Empirical Examination of Human Capital and Socioeconomic Outcomes
Source: Research Square preprint supplement (doi:10.21203/rs.3.rs-8717122/v1), 2026-02-16
Supplement: Supplementary file 2 [file fe94b3046267253754a13dcc.xlsx]

## Sheet: Navigation
	SmartPLS report
	Please cite the use of SmartPLS: Ringle, C. M., Wende, S., and Becker, J.-M. 2024. "SmartPLS 4." Bönningstedt: SmartPLS, https://www.smartpls.com.
		complete
	Final results
	Path coefficients
	Indirect effects
	Total effects
	Outer loadings
	Outer weights
	Latent variables
	Residuals
	Quality criteria
	R-square
	f-square
	Construct reliability and validity
	Discriminant validity
	Collinearity statistics (VIF)
	Model fit
	Model selection criteria
	Algorithm
	Setting
	Stop criterion changes
	Posthoc minimum sample size
	Execution log
	Model and data
	Inner model
	Outer model
	Indicator data (original)
	Indicator data (standardized)
	Indicator data (correlations)

## Sheet: complete
	SmartPLS report
	Please cite the use of SmartPLS: Ringle, C. M., Wende, S., and Becker, J.-M. 2024. "SmartPLS 4." Bönningstedt: SmartPLS, https://www.smartpls.com.
	Final results
	Path coefficients
	Matrix
		CW	EE	HC	IS
	CW
	EE	0.364901		0.182347
	HC	0.45573
	IS	-0.0733625		0.723895
	List
		Path coefficients
	EE -> CW	0.364901
	EE -> HC	0.182347
	HC -> CW	0.45573
	IS -> CW	-0.0733625
	IS -> HC	0.723895
	Indirect effects
	Total indirect effects
		CW	EE	HC	IS
	CW
	EE	0.0831009
	HC
	IS	0.3299
	Specific indirect effects
		Specific indirect effects
	IS -> HC -> CW	0.3299
	EE -> HC -> CW	0.0831009
	Total effects
	Matrix
		CW	EE	HC	IS
	CW
	EE	0.448002		0.182347
	HC	0.45573
	IS	0.256538		0.723895
	List
		Total effects
	EE -> CW	0.448002
	EE -> HC	0.182347
	HC -> CW	0.45573
	IS -> CW	0.256538
	IS -> HC	0.723895
	Outer loadings
	Matrix
		CW	EE	HC	IS
	CW1	0.895447
	CW2	0.83782
	CW3	0.900781
	CW4	0.915326
	CW5	0.882272
	EE1		0.833632
	EE2		0.886427
	EE3		0.816638
	EE4		0.880985
	EE5		0.803972
	HC1			0.889054
	HC2			0.879386
	HC3			0.832196
	HC4			0.874517
	HC5			0.944691
	IS1				0.875333
	IS2				0.889887
	IS3				0.910994
	IS4				0.789943
	IS5				0.766284
	List
		Outer loadings
	CW1 <- CW	0.895447
	CW2 <- CW	0.83782
	CW3 <- CW	0.900781
	CW4 <- CW	0.915326
	CW5 <- CW	0.882272
	EE1 <- EE	0.833632
	EE2 <- EE	0.886427
	EE3 <- EE	0.816638
	EE4 <- EE	0.880985
	EE5 <- EE	0.803972
	HC1 <- HC	0.889054
	HC2 <- HC	0.879386
	HC3 <- HC	0.832196
	HC4 <- HC	0.874517
	HC5 <- HC	0.944691
	IS1 <- IS	0.875333
	IS2 <- IS	0.889887
	IS3 <- IS	0.910994
	IS4 <- IS	0.789943
	IS5 <- IS	0.766284
	Outer weights
	Matrix
		CW	EE	HC	IS
	CW1	0.241887
	CW2	0.178512
	CW3	0.218071
	CW4	0.241351
	CW5	0.245382
	EE1		0.240794
	EE2		0.233204
	EE3		0.187146
	EE4		0.235308
	EE5		0.289084
	HC1			0.240314
	HC2			0.228721
	HC3			0.199334
	HC4			0.21381
	HC5			0.245952
	IS1				0.224308
	IS2				0.219206
	IS3				0.250725
	IS4				0.218801
	IS5				0.270576
	List
		Outer weights
	CW1 <- CW	0.241887
	CW2 <- CW	0.178512
	CW3 <- CW	0.218071
	CW4 <- CW	0.241351
	CW5 <- CW	0.245382
	EE1 <- EE	0.240794
	EE2 <- EE	0.233204
	EE3 <- EE	0.187146
	EE4 <- EE	0.235308
	EE5 <- EE	0.289084
	HC1 <- HC	0.240314
	HC2 <- HC	0.228721
	HC3 <- HC	0.199334
	HC4 <- HC	0.21381
	HC5 <- HC	0.245952
	IS1 <- IS	0.224308
	IS2 <- IS	0.219206
	IS3 <- IS	0.250725
	IS4 <- IS	0.218801
	IS5 <- IS	0.270576
	Latent variables
	Scores
		CW	EE	HC	IS
	0	1.27447	0.143473	0.199611	-0.567318
	1	0.759078	0.143473	-1.27963	-1.1112
	2	0.241031	0.760474	0.462921	0.361939
	3	1.53635	0.760474	0.689972	-0.567318
	4	1.30749	0.760474	0.45974	0.56507
	5	0.273399	0.472253	0.229508	0.361939
	6	0.273399	0.472253	0.229508	0.361939
	7	1.24716	-0.0833456	0.462921	0.884933
	8	0.743773	-0.412126	-0.0306215	0.361939
	9	0.756424	0.143473	-0.0306215	0.835514
	10	0.469893	0.472253	0.229508	0.208227
	11	-1.37649	1.45022	0.45974	1.44532
	12	-1.84686	-0.802309	-1.79988	-1.1112
	13	0.985285	-0.0833456	0.45974	0.361939
	14	-0.491222	0.225629	0.226326	0.158808
	15	-1.05429	-0.0833456	0.226326	0.361939
	16	-0.26236	-1.10187	-0.152794	-0.703546
	17	-0.26236	-0.7211	-0.616439	-0.0937426
	18	-1.2958	-1.10187	-1.27963	-0.994873
	19	-1.84686	-1.43065	-2.12239	-2.51444
	20	-2.59112	-2.35663	-2.38252	-2.44712
	21	-1.84686	-1.73963	-2.12239	-1.99144
	22	-1.84686	-1.43065	-1.76999	-1.721
	23	-1.84686	-1.43065	-1.76999	-2.19457
	24	-2.62414	-2.02785	-2.58604	-2.19457
	25	-0.551546	-1.10187	-0.849853	-1.17712
	26	0.0445371	-0.412126	-1.27963	-1.36375
	27	-1.55768	-0.412126	-1.27963	-1.1112
	28	-0.24971	-0.412126	-1.27963	-0.434489
	29	-0.26236	-0.7211	0.199611	0.109389
	30	-0.26236	-0.7211	0.199611	-0.0937426
	31	-1.05429	-0.412126	0.199611	0.158808
	32	-0.0208478	-0.7211	0.199611	0.361939
	33	-1.05429	-0.0833456	0.226326	0.158808
	34	-0.780407	-0.0833456	0.226326	0.158808
	35	-1.05429	-0.0833456	0.45974	-0.346293
	36	-1.05429	-0.0833456	0.45974	-0.346293
	37	-0.780407	-0.0833456	0.45974	0.158808
	38	-0.765102	-0.0833456	-0.00390591	0.158808
	39	-0.765102	-0.0833456	0.226326	0.158808
	40	-0.491222	-0.0833456	0.45974	0.158808
	41	-0.24971	0.204875	0.45974	0.361939
	42	-0.491222	-1.04988	-0.876568	0.361939
	43	-0.24971	-0.39232	0.45974	0.361939
	44	-0.0208478	-0.39232	0.45974	0.361939
	45	-0.0208478	-0.0833456	0.45974	0.361939
	46	-1.2958	-0.7211	-0.616439	0.158808
	47	-0.26236	0.472253	0.45974	0.158808
	48	-0.24971	-1.06131	0.45974	0.00468565
	49	-0.24971	0.204875	0.45974	0.361939
	50	-0.24971	0.204875	0.45974	0.361939
	51	-0.24971	0.204875	0.45974	0.361939
	52	-0.24971	0.163279	0.45974	0.361939
	53	-0.765102	-0.0833456	0.45974	0.361939
	54	-0.24971	0.204875	0.45974	0.361939
	55	-1.31617	-0.0833456	-0.00390591	0.361939
	56	-0.24971	0.204875	0.45974	0.614489
	57	-1.05429	-0.0833456	-0.00390591	0.361939
	58	-0.26236	-0.0833456	0.45974	-0.567318
	59	-0.0208478	0.204875	0.45974	-0.567318
	60	-1.05429	-0.412126	-0.497448	-0.567318
	61	0.743773	-0.165501	-0.616439	0.361939
	62	-0.0208478	0.472253	0.45974	0.361939
	63	-0.0208478	0.204875	0.45974	0.361939
	64	0.241031	0.204875	0.45974	0.361939
	65	0.241031	-0.0833456	0.45974	0.361939
	66	-0.491222	0.204875	0.45974	0.411358
	67	-0.0208478	0.472253	0.45974	0.361939
	68	0.514911	0.472253	0.45974	0.361939
	69	0.514911	0.472253	0.226326	0.361939
	70	-0.000481651	0.472253	0.45974	0.361939
	71	0.469893	0.472253	0.226326	0.158808
	72	0.743773	0.719825	-0.0338027	0.158808
	73	0.77679	0.801034	0.486455	0.361939
	74	0.77679	0.472253	0.812144	0.361939
	75	0.514911	-0.0833456	0.45974	0.361939
	76	0.514911	0.472253	0.45974	0.361939
	77	1.27447	0.472253	0.45974	0.361939
	78	-2.63944	-1.71887	-3.36822	-3.26145
	79	-1.60535	-1.06969	-2.49376	-2.08987
	80	-1.84686	-2.35663	-1.83376	-1.90325
	81	-2.39793	-3.293	-3.62834	-3.34825
	82	-2.91332	-2.02785	-3.36822	-3.26145
	83	-1.13498	-3.32414	-1.3434	-1.95894
	84	-1.37649	-2.38786	-2.12557	-1.60468
	85	-1.84686	-3.27319	-2.35262	-2.80438
	86	-2.02805	-2.89242	-2.35262	-2.44712
	87	-2.30193	-2.6042	-2.12239	-2.44712
	88	-1.2838	-3.63312	-2.12239	-3.43207
	89	-1.84686	-3.27319	-2.35581	-2.55183
	90	-0.840731	-1.43065	-2.12239	-1.24742
	91	-1.58499	-1.10187	-1.50986	-1.24742
	92	-1.2958	-0.412126	-1.50986	-0.89017
	93	1.00565	1.14124	0.693153	1.44532
	94	-1.05429	-0.0833456	0.45974	0.361939
	95	-1.05429	-0.0833456	0.45974	0.361939
	96	-0.0208478	0.472253	0.45974	0.361939
	97	-0.0208478	0.472253	0.45974	0.614489
	98	-0.0208478	-0.39232	0.45974	0.361939
	99	-0.0208478	-0.0833456	0.693153	0.361939
	100	-0.0208478	0.801034	0.953282	0.361939
	101	0.241031	-0.0635392	0.719869	0.361939
	102	0.241031	0.801034	0.953282	0.361939
	103	0.241031	0.472253	0.45974	0.361939
	104	-0.26236	1.1818	0.953282	0.719192
	105	-0.26236	1.1818	0.719869	0.719192
	106	0.743773	0.472253	0.689972	0.614489
	107	-0.26236	0.801034	0.719869	0.361939
	108	0.241031	0.472253	0.45974	0.361939
	109	0.241031	1.75816	0.953282	1.19277
	110	0.241031	-0.0833456	0.689972	0.31252
	111	1.03296	0.472253	0.689972	1.08806
	112	-0.26236	0.853024	-0.000724744	0.719192
	113	0.514911	1.1006	-0.616439	0.719192
	114	0.514911	0.204875	0.45974	0.361939
	115	0.985285	1.20256	1.18351	0.922323
	116	0.514911	0.801034	0.719869	0.56507
	117	1.03296	0.472253	0.45974	0.56507
	118	0.743773	1.75816	1.73546	1.4662
	119	0.743773	1.75816	1.96569	1.4662
	120	0.985285	1.49078	1.96569	1.26307
	121	-0.26236	0.472253	0.45974	0.361939
	122	0.502909	-0.0635392	1.53592	-0.111636
	123	1.53635	0.204875	0.45974	0.56507
	124	0.273399	-0.0833456	1.47215	0.179691
	125	0.208014	-0.39232	1.47215	0.179691
	126	0.985285	0.472253	1.47215	1.63194
	127	0.220665	1.42938	0.229508	1.19277
	128	-0.0208478	1.42938	-0.399807	0.357563
	129	0.220665	1.42938	0.45974	1.24219
	130	0.273399	1.37739	0.953282	0.835514
	131	0.261397	0.472253	0.689972	0.884933
	132	0.743773	1.75816	0.719869	1.44532
	133	0.482543	0.472253	0.889513	0.432241
	134	0.482543	1.75816	0.256223	1.44532
	135	1.53635	1.42938	0.689972	1.19277
	136	0.792095	1.42938	0.45974	1.44532
	137	1.24716	1.47003	1.73546	1.9892
	138	1.24716	1.47003	0.953282	0.989636
	139	1.53635	0.801034	0.719869	0.158808
	140	1.27447	0.143473	0.199611	-0.567318
	141	0.759078	0.143473	-1.27963	-1.1112
	142	0.241031	0.760474	0.462921	0.361939
	143	1.53635	0.760474	0.689972	-0.567318
	144	1.30749	0.760474	0.45974	0.56507
	145	0.273399	0.472253	0.229508	0.361939
	146	0.273399	0.472253	0.229508	0.361939
	147	1.24716	-0.0833456	0.462921	0.884933
	148	0.743773	-0.412126	-0.0306215	0.361939
	149	1.27447	0.143473	0.199611	-0.567318
	150	0.759078	0.143473	-1.27963	-1.1112
	151	0.241031	0.760474	0.462921	0.361939
	152	1.53635	0.760474	0.689972	-0.567318
	153	1.30749	0.760474	0.45974	0.56507
	154	0.273399	0.472253	0.229508	0.361939
	155	0.273399	0.472253	0.229508	0.361939
	156	1.24716	-0.0833456	0.462921	0.884933
	157	0.743773	-0.412126	-0.0306215	0.361939
	158	0.756424	0.143473	-0.0306215	0.835514
	159	0.469893	0.472253	0.229508	0.208227
	160	-1.37649	1.45022	0.45974	1.44532
	161	-1.84686	-0.802309	-1.79988	-1.1112
	162	0.985285	-0.0833456	0.45974	0.361939
	163	-0.491222	0.225629	0.226326	0.158808
	164	-1.05429	-0.0833456	0.226326	0.361939
	165	-0.26236	-1.10187	-0.152794	-0.703546
	166	-0.26236	-0.7211	-0.616439	-0.0937426
	167	-1.2958	-1.10187	-1.27963	-0.994873
	168	1.30749	0.760474	0.45974	0.56507
	169	0.273399	0.472253	0.229508	0.361939
	170	0.273399	0.472253	0.229508	0.361939
	171	1.24716	-0.0833456	0.462921	0.884933
	172	0.743773	-0.412126	-0.0306215	0.361939
	173	1.27447	0.143473	0.199611	-0.567318
	174	0.759078	0.143473	-1.27963	-1.1112
	175	0.241031	0.760474	0.462921	0.361939
	176	1.53635	0.760474	0.689972	-0.567318
	177	1.30749	0.760474	0.45974	0.56507
	178	0.273399	0.472253	0.229508	0.361939
	179	0.273399	0.472253	0.229508	0.361939
	180	1.24716	-0.0833456	0.462921	0.884933
	181	0.985285	-0.0833456	0.45974	0.361939
	182	-0.491222	0.225629	0.226326	0.158808
	183	-1.05429	-0.0833456	0.226326	0.361939
	184	-0.26236	-1.10187	-0.152794	-0.703546
	185	-0.26236	-0.7211	-0.616439	-0.0937426
	186	-1.2958	-1.10187	-1.27963	-0.994873
	187	1.30749	0.760474	0.45974	0.56507
	188	0.273399	0.472253	0.229508	0.361939
	189	0.273399	0.472253	0.229508	0.361939
	190	1.24716	-0.0833456	0.462921	0.884933
	191	0.743773	-0.412126	-0.0306215	0.361939
	192	1.27447	0.143473	0.199611	-0.567318
	193	0.759078	0.143473	-1.27963	-1.1112
	194	0.241031	0.760474	0.462921	0.361939
	195	1.24716	-0.0833456	0.462921	0.884933
	196	0.743773	-0.412126	-0.0306215	0.361939
	197	1.27447	0.143473	0.199611	-0.567318
	198	0.759078	0.143473	-1.27963	-1.1112
	199	0.241031	0.760474	0.462921	0.361939
	Correlations
		CW	EE	HC	IS
	CW	1	0.661057	0.677428	0.628604
	EE	0.661057	1	0.783543	0.830502
	HC	0.677428	0.783543	1	0.875334
	IS	0.628604	0.830502	0.875334	1
	Covariances
		CW	EE	HC	IS
	CW	1	0.661057	0.677428	0.628604
	EE	0.661057	1	0.783543	0.830502
	HC	0.677428	0.783543	1	0.875334
	IS	0.628604	0.830502	0.875334	1
	Descriptives
		Mean	Median	Observed min	Observed max	Standard deviation	Excess kurtosis	Skewness	Number of observations used	Cramér-von Mises test statistic	Cramér-von Mises p value
	CW	2.53131e-16	0.241031	-2.91332	1.53635	1	-0.085029	-0.662134	200	0.466448	5.58646e-06
	EE	1.54876e-16	0.143473	-3.63312	1.75816	1	2.36767	-1.24415	200	1.0467	1.03294e-09
	HC	-5.68989e-17	0.45974	-3.62834	1.96569	1	1.78931	-1.3776	200	3.30207	7.37e-10
	IS	-4.96825e-17	0.361939	-3.43207	1.9892	1	1.97385	-1.36952	200	2.55675	7.37e-10
	Residuals
	Outer model scores
	Case index	CW1	CW2	CW3	CW4	CW5	EE1	EE2	EE3	EE4	EE5	HC1	HC2	HC3	HC4	HC5	IS1	IS2	IS3	IS4	IS5
	0	0.226661	0.265556	-0.0742027	-0.651157	0.289784	0.425014	-0.0128838	0.582906	0.136215	-0.831859	0.211049	-0.892046	0.388289	0.126948	0.19829	-0.839152	-0.488317	-0.10769	0.562443	0.736238
	1	-0.310286	0.697363	-0.865872	-0.179404	0.744501	0.425014	-0.0128838	0.582906	0.136215	-0.831859	-0.4164	0.408775	0.464295	-0.58951	0.162894	-0.363078	-0.00432738	0.387779	0.992075	-0.857074
	2	0.153598	-0.150658	-0.399225	0.294778	0.0230476	1.10762	-0.55981	0.0790398	-0.407354	-0.190592	0.948238	0.0137216	-0.985845	-0.103321	-0.0504565	0.158617	-0.0815042	0.0530419	-0.171617	0.0241635
	3	-0.00783764	0.0461492	-0.310098	0.19419	0.058736	1.10762	-0.55981	0.0790398	-0.407354	-0.190592	-0.224908	-0.185944	1.13522	-0.301881	-0.26495	-0.839152	-0.488317	-0.10769	0.562443	0.736238
	4	0.197096	-1.04416	-0.103944	0.403674	0.260654	1.10762	-0.55981	0.0790398	-0.407354	-0.190592	-0.0202194	0.016519	0.171811	-0.100539	-0.0474513	0.886399	-0.262268	-0.132009	-0.332079	-0.131493
	5	-0.87384	-0.177777	0.827544	0.26515	-0.00550978	0.150932	-0.304324	0.314412	-0.153435	0.0411297	0.18447	0.218982	-0.7916	0.100803	0.170047	0.158617	-0.0815042	0.0530419	-0.171617	0.0241635
	6	-0.87384	-0.177777	0.827544	0.26515	-0.00550978	0.150932	-0.304324	0.314412	-0.153435	0.0411297	0.18447	0.218982	-0.7916	0.100803	0.170047	0.158617	-0.0815042	0.0530419	-0.171617	0.0241635
	7	0.251112	0.288434	-0.0496052	0.458889	-0.864635	-0.582864	0.188174	-0.660583	0.336039	0.487815	0.948238	0.0137216	-0.985845	-0.103321	-0.0504565	-0.299177	0.686835	0.583876	-0.584752	-0.376598
	8	-0.296581	0.710185	0.40384	-0.165395	-0.420508	-0.308782	0.479614	-0.392088	0.62569	-0.385173	0.415739	-0.689583	-0.575121	0.32829	0.415789	0.158617	-0.0815042	0.0530419	-0.171617	0.0241635
	9	0.690544	-0.582465	0.392444	-0.176975	-0.431669	0.425014	-0.0128838	0.582906	0.136215	-0.831859	0.415739	-0.689583	-0.575121	0.32829	0.415789	0.649671	0.730813	-0.378382	-0.545714	-0.338729
	10	-0.0513359	0.939648	-0.605379	0.0852946	-0.178871	0.150932	-0.304324	0.314412	-0.153435	0.0411297	0.18447	0.218982	-0.7916	0.100803	0.170047	-1.51801	0.0552819	1.20035	-0.0501932	0.14195
	11	0.603548	1.20453	-0.198119	-0.394766	-0.906882	0.53263	0.461557	-0.484231	0.298056	-0.745127	-0.0202194	0.016519	0.171811	-0.100539	-0.0474513	0.115889	0.188157	0.0733693	0.605351	-0.806012
	12	0.0262892	0.31657	0.225585	0.0357792	-0.491884	0.0164866	0.825483	1.35527	0.969435	-2.34611	0.0461379	-1.40835	0.897251	-0.134535	0.654378	-0.363078	-0.00432738	0.387779	0.992075	-0.857074
	13	0.485611	0.507842	0.18629	-0.386458	-0.633587	-0.582864	0.188174	-0.660583	0.336039	0.487815	-0.0202194	0.016519	0.171811	-0.100539	-0.0474513	0.158617	-0.0815042	0.0530419	-0.171617	0.0241635
	14	-0.189163	-0.819214	0.260374	-0.120024	0.669093	-0.840435	-0.0857089	-0.912903	1.3769	0.239409	-0.783988	0.22178	0.366056	0.103585	0.173052	-0.569165	0.0992595	0.238093	-0.0111548	0.17982
	15	0.315033	-0.347466	-0.488352	0.395365	-0.0126407	-0.582864	0.188174	-0.660583	0.336039	0.487815	-0.783988	0.22178	0.366056	0.103585	0.173052	0.158617	-0.0815042	0.0530419	-0.171617	0.0241635
	16	-0.394096	0.271093	0.0542199	-0.329507	0.467175	0.266211	-0.541753	0.171183	-0.0797196	0.169362	0.524356	-0.582146	0.681558	0.435132	-0.901614	0.185683	0.866657	-0.990865	-0.96272	0.840627
	17	-0.394096	0.271093	0.0542199	-0.329507	0.467175	-0.0512117	0.753497	-0.139768	-0.415173	-0.136767	-0.0347234	-0.174423	-0.0876063	0.840598	-0.463612	-0.348099	0.324001	-0.539114	0.188346	0.373345
	18	-0.467159	-0.145122	-0.270803	0.616427	0.200439	0.266211	-0.541753	0.171183	-0.0797196	0.169362	-0.4164	0.408775	0.464295	-0.58951	0.162894	0.440691	1.1259	0.28181	-0.732588	-0.946209
	19	0.0262892	0.31657	0.225585	0.0357792	-0.491884	0.540293	-0.250313	0.439678	0.209931	-0.703626	0.332865	0.0125729	0.0106323	0.147503	-0.47377	0.865226	-1.22309	-0.348434	0.467781	0.218208
	20	-0.305724	-0.341929	-0.35993	0.717015	0.16475	0.115254	0.570496	1.19586	-0.287363	-1.09649	0.564134	-0.895992	0.227111	0.374991	-0.228029	-0.0992843	-0.0492473	-0.409756	0.414607	0.166627
	21	0.0262892	0.31657	0.225585	0.0357792	-0.491884	0.797863	0.0235696	0.691998	-0.830932	-0.45522	0.332865	0.0125729	0.0106323	0.147503	-0.47377	0.407432	-0.454752	0.1824	0.0546449	-0.182554
	22	0.0262892	0.31657	0.225585	0.0357792	-0.491884	0.540293	-0.250313	0.439678	0.209931	-0.703626	0.0195581	-0.297327	-0.282637	-0.16068	0.626134	0.170703	0.538329	-0.0639726	-0.15899	-0.389791
	23	0.0262892	0.31657	0.225585	0.0357792	-0.491884	0.540293	-0.250313	0.439678	0.209931	-0.703626	0.0195581	-0.297327	-0.282637	-0.16068	0.626134	-0.32035	-0.273988	0.367451	0.215107	-0.0268984
	24	-0.276159	0.967784	-0.330189	-0.337815	0.19388	-0.158828	0.279056	0.927369	-0.577013	-0.223499	-0.226215	0.420297	-0.758532	0.552969	-0.0357681	-0.32035	-0.273988	0.367451	0.215107	-0.0268984
	25	-0.135146	0.513378	0.314713	-0.064808	-0.456196	0.266211	-0.541753	0.171183	-0.0797196	0.169362	-0.798492	0.0308381	0.106639	1.04472	-0.243109	-0.305371	0.0543396	-0.559441	-0.588623	1.20352
	26	-0.668906	-1.26808	1.0337	0.474633	0.196408	-0.308782	0.479614	-0.392088	0.62569	-0.385173	-0.4164	0.408775	0.464295	-0.58951	0.162894	-0.142013	0.220414	-0.389428	1.19158	-0.663549
	27	-0.232661	0.0742851	-0.0349074	-0.22892	0.431487	-0.308782	0.479614	-0.392088	0.62569	-0.385173	-0.4164	0.408775	0.464295	-0.58951	0.162894	-0.363078	-0.00432738	0.387779	0.992075	-0.857074
	28	0.593029	-1.02156	0.0428244	-0.341086	0.456014	-0.308782	0.479614	-0.392088	0.62569	-0.385173	-0.4164	0.408775	0.464295	-0.58951	0.162894	0.855757	0.627226	-0.228696	0.457516	-1.37562
	29	-0.394096	0.271093	0.0542199	-0.329507	0.467175	-0.0512117	0.753497	-0.139768	-0.415173	-0.136767	0.211049	-0.892046	0.388289	0.126948	0.19829	0.379683	0.143237	-0.724165	0.0278836	0.217689
	30	-0.394096	0.271093	0.0542199	-0.329507	0.467175	-0.0512117	0.753497	-0.139768	-0.415173	-0.136767	0.211049	-0.892046	0.388289	0.126948	0.19829	-0.348099	0.324001	-0.539114	0.188346	0.373345
	31	0.315033	-0.347466	-0.488352	0.395365	-0.0126407	-0.308782	0.479614	-0.392088	0.62569	-0.385173	0.211049	-0.892046	0.388289	0.126948	0.19829	-0.569165	0.0992595	0.238093	-0.0111548	0.17982
	32	0.388096	0.0687487	-0.16333	-0.550569	0.254096	-0.0512117	0.753497	-0.139768	-0.415173	-0.136767	0.211049	-0.892046	0.388289	0.126948	0.19829	0.158617	-0.0815042	0.0530419	-0.171617	0.0241635
	33	0.315033	-0.347466	-0.488352	0.395365	-0.0126407	-0.582864	0.188174	-0.660583	0.336039	0.487815	-0.783988	0.22178	0.366056	0.103585	0.173052	-0.569165	0.0992595	0.238093	-0.0111548	0.17982
	34	0.0697874	-0.576928	0.520867	0.144675	-0.254278	-0.582864	0.188174	-0.660583	0.336039	0.487815	-0.783988	0.22178	0.366056	0.103585	0.173052	-0.569165	0.0992595	0.238093	-0.0111548	0.17982
	35	0.315033	-0.347466	-0.488352	0.395365	-0.0126407	-0.582864	0.188174	-0.660583	0.336039	0.487815	-0.0202194	0.016519	0.171811	-0.100539	-0.0474513	-0.127033	0.548742	-1.31632	0.387846	0.56687
	36	0.315033	-0.347466	-0.488352	0.395365	-0.0126407	-0.582864	0.188174	-0.660583	0.336039	0.487815	-0.0202194	0.016519	0.171811	-0.100539	-0.0474513	-0.127033	0.548742	-1.31632	0.387846	0.56687
	37	0.0697874	-0.576928	0.520867	0.144675	-0.254278	-0.582864	0.188174	-0.660583	0.336039	0.487815	-0.0202194	0.016519	0.171811	-0.100539	-0.0474513	-0.569165	0.0992595	0.238093	-0.0111548	0.17982
	38	0.0560827	-0.589751	-0.748845	0.130666	0.91073	-0.582864	0.188174	-0.660583	0.336039	0.487815	-0.579299	0.424243	-0.597354	0.304927	0.390551	-0.569165	0.0992595	0.238093	-0.0111548	0.17982
	39	0.0560827	-0.589751	-0.748845	0.130666	0.91073	-0.582864	0.188174	-0.660583	0.336039	0.487815	-0.783988	0.22178	0.366056	0.103585	0.173052	-0.569165	0.0992595	0.238093	-0.0111548	0.17982
	40	-0.189163	-0.819214	0.260374	-0.120024	0.669093	-0.582864	0.188174	-0.660583	0.336039	0.487815	-0.0202194	0.016519	0.171811	-0.100539	-0.0474513	-0.569165	0.0992595	0.238093	-0.0111548	0.17982
	41	0.593029	-1.02156	0.0428244	-0.341086	0.456014	0.373827	-0.0673126	-0.895955	0.0821209	0.256094	-0.0202194	0.016519	0.171811	-0.100539	-0.0474513	0.158617	-0.0815042	0.0530419	-0.171617	0.0241635
	42	-0.189163	-0.819214	0.260374	-0.120024	0.669093	0.22287	1.04494	0.128726	-0.125522	-1.00976	0.196546	-1.08299	0.128872	1.06809	-0.217871	0.158617	-0.0815042	0.0530419	-0.171617	0.0241635
	43	0.593029	-1.02156	0.0428244	-0.341086	0.456014	-0.325294	0.462057	-0.408263	-0.704824	0.736222	-0.0202194	0.016519	0.171811	-0.100539	-0.0474513	0.158617	-0.0815042	0.0530419	-0.171617	0.0241635
	44	0.388096	0.0687487	-0.16333	-0.550569	0.254096	-0.325294	0.462057	-0.408263	-0.704824	0.736222	-0.0202194	0.016519	0.171811	-0.100539	-0.0474513	0.158617	-0.0815042	0.0530419	-0.171617	0.0241635
	45	0.388096	0.0687487	-0.16333	-0.550569	0.254096	-0.582864	0.188174	-0.660583	0.336039	0.487815	-0.0202194	0.016519	0.171811	-0.100539	-0.0474513	0.158617	-0.0815042	0.0530419	-0.171617	0.0241635
	46	-0.467159	-0.145122	-0.270803	0.616427	0.200439	-0.0512117	0.753497	-0.139768	-0.415173	-0.136767	-0.0347234	-0.174423	-0.0876063	0.840598	-0.463612	-0.569165	0.0992595	0.238093	-0.0111548	0.17982
	47	-0.394096	0.271093	0.0542199	-0.329507	0.467175	0.150932	-0.304324	0.314412	-0.153435	0.0411297	-0.0202194	0.016519	0.171811	-0.100539	-0.0474513	-0.569165	0.0992595	0.238093	-0.0111548	0.17982
	48	0.593029	-1.02156	0.0428244	-0.341086	0.456014	-0.964562	-0.577707	0.138061	-0.115452	1.27407	-0.0202194	0.016519	0.171811	-0.100539	-0.0474513	0.471333	0.236411	0.378497	-1.52218	0.297921
	49	0.593029	-1.02156	0.0428244	-0.341086	0.456014	0.373827	-0.0673126	-0.895955	0.0821209	0.256094	-0.0202194	0.016519	0.171811	-0.100539	-0.0474513	0.158617	-0.0815042	0.0530419	-0.171617	0.0241635
	50	0.593029	-1.02156	0.0428244	-0.341086	0.456014	0.373827	-0.0673126	-0.895955	0.0821209	0.256094	-0.0202194	0.016519	0.171811	-0.100539	-0.0474513	0.158617	-0.0815042	0.0530419	-0.171617	0.0241635
	51	0.593029	-1.02156	0.0428244	-0.341086	0.456014	0.373827	-0.0673126	-0.895955	0.0821209	0.256094	-0.0202194	0.016519	0.171811	-0.100539	-0.0474513	0.158617	-0.0815042	0.0530419	-0.171617	0.0241635
	52	0.593029	-1.02156	0.0428244	-0.341086	0.456014	0.408503	-0.0304408	0.566732	-1.1943	0.289536	-0.0202194	0.016519	0.171811	-0.100539	-0.0474513	0.158617	-0.0815042	0.0530419	-0.171617	0.0241635
	53	0.0560827	-0.589751	-0.748845	0.130666	0.91073	-0.582864	0.188174	-0.660583	0.336039	0.487815	-0.0202194	0.016519	0.171811	-0.100539	-0.0474513	0.158617	-0.0815042	0.0530419	-0.171617	0.0241635
	54	0.593029	-1.02156	0.0428244	-0.341086	0.456014	0.373827	-0.0673126	-0.895955	0.0821209	0.256094	-0.0202194	0.016519	0.171811	-0.100539	-0.0474513	0.158617	-0.0815042	0.0530419	-0.171617	0.0241635
	55	0.549531	-0.128059	-0.252457	-0.449982	0.218407	-0.582864	0.188174	-0.660583	0.336039	0.487815	-0.579299	0.424243	-0.597354	0.304927	0.390551	0.158617	-0.0815042	0.0530419	-0.171617	0.0241635
	56	0.593029	-1.02156	0.0428244	-0.341086	0.456014	0.373827	-0.0673126	-0.895955	0.0821209	0.256094	-0.0202194	0.016519	0.171811	-0.100539	-0.0474513	-0.0624485	-0.306245	0.830249	-0.371117	-0.169362
	57	0.315033	-0.347466	-0.488352	0.395365	-0.0126407	-0.582864	0.188174	-0.660583	0.336039	0.487815	-0.579299	0.424243	-0.597354	0.304927	0.390551	0.158617	-0.0815042	0.0530419	-0.171617	0.0241635
	58	-0.394096	0.271093	0.0542199	-0.329507	0.467175	-0.582864	0.188174	-0.660583	0.336039	0.487815	-0.0202194	0.016519	0.171811	-0.100539	-0.0474513	-0.839152	-0.488317	-0.10769	0.562443	0.736238
	59	0.388096	0.0687487	-0.16333	-0.550569	0.254096	0.373827	-0.0673126	-0.895955	0.0821209	0.256094	-0.0202194	0.016519	0.171811	-0.100539	-0.0474513	-0.839152	-0.488317	-0.10769	0.562443	0.736238
	60	0.315033	-0.347466	-0.488352	0.395365	-0.0126407	-0.308782	0.479614	-0.392088	0.62569	-0.385173	-1.1118	-0.279061	-0.18663	0.736538	0.856796	-0.839152	-0.488317	-0.10769	0.562443	0.736238
	61	-0.296581	0.710185	0.40384	-0.165395	-0.420508	0.682585	0.260999	0.835226	-0.904647	-0.583452	-0.0347234	-0.174423	-0.0876063	0.840598	-0.463612	0.158617	-0.0815042	0.0530419	-0.171617	0.0241635
	62	0.388096	0.0687487	-0.16333	-0.550569	0.254096	0.150932	-0.304324	0.314412	-0.153435	0.0411297	-0.0202194	0.016519	0.171811	-0.100539	-0.0474513	0.158617	-0.0815042	0.0530419	-0.171617	0.0241635
	63	0.388096	0.0687487	-0.16333	-0.550569	0.254096	0.373827	-0.0673126	-0.895955	0.0821209	0.256094	-0.0202194	0.016519	0.171811	-0.100539	-0.0474513	0.158617	-0.0815042	0.0530419	-0.171617	0.0241635
	64	0.153598	-0.150658	-0.399225	0.294778	0.0230476	0.373827	-0.0673126	-0.895955	0.0821209	0.256094	-0.0202194	0.016519	0.171811	-0.100539	-0.0474513	0.158617	-0.0815042	0.0530419	-0.171617	0.0241635
	65	0.153598	-0.150658	-0.399225	0.294778	0.0230476	-0.582864	0.188174	-0.660583	0.336039	0.487815	-0.0202194	0.016519	0.171811	-0.100539	-0.0474513	0.158617	-0.0815042	0.0530419	-0.171617	0.0241635
	66	-0.189163	-0.819214	0.260374	-0.120024	0.669093	0.373827	-0.0673126	-0.895955	0.0821209	0.256094	-0.0202194	0.016519	0.171811	-0.100539	-0.0474513	-0.79023	-0.125482	1.0153	-0.210655	-0.0137056
	67	0.388096	0.0687487	-0.16333	-0.550569	0.254096	0.150932	-0.304324	0.314412	-0.153435	0.0411297	-0.0202194	0.016519	0.171811	-0.100539	-0.0474513	0.158617	-0.0815042	0.0530419	-0.171617	0.0241635
	68	-0.0916478	-0.380121	0.609994	0.0440878	-0.218589	0.150932	-0.304324	0.314412	-0.153435	0.0411297	-0.0202194	0.016519	0.171811	-0.100539	-0.0474513	0.158617	-0.0815042	0.0530419	-0.171617	0.0241635
	69	-0.0916478	-0.380121	0.609994	0.0440878	-0.218589	0.150932	-0.304324	0.314412	-0.153435	0.0411297	-0.783988	0.22178	0.366056	0.103585	0.173052	0.158617	-0.0815042	0.0530419	-0.171617	0.0241635
	70	-0.628594	0.0516856	-0.181675	0.51584	0.236127	0.150932	-0.304324	0.314412	-0.153435	0.0411297	-0.0202194	0.016519	0.171811	-0.100539	-0.0474513	0.158617	-0.0815042	0.0530419	-0.171617	0.0241635
	71	-0.0513359	0.939648	-0.605379	0.0852946	-0.178871	0.150932	-0.304324	0.314412	-0.153435	0.0411297	-0.783988	0.22178	0.366056	0.103585	0.173052	-0.569165	0.0992595	0.238093	-0.0111548	0.17982
	72	-0.296581	0.710185	0.40384	-0.165395	-0.420508	-0.0554518	-0.523778	1.54095	0.941522	-1.29523	-0.552719	-0.686785	0.582535	0.331072	0.418794	-0.569165	0.0992595	0.238093	-0.0111548	0.17982
	73	-0.326146	-0.599528	0.374099	0.889435	-0.449637	-0.12315	-0.595764	0.0459172	-0.443086	0.914118	-1.01526	1.13034	0.149578	-0.123902	-0.0726893	0.158617	-0.0815042	0.0530419	-0.171617	0.0241635
	74	-0.326146	-0.599528	0.374099	0.889435	-0.449637	0.150932	-0.304324	0.314412	-0.153435	0.0411297	-0.333526	-0.293381	-0.121459	-0.408722	1.05245	0.158617	-0.0815042	0.0530419	-0.171617	0.0241635
	75	-0.0916478	-0.380121	0.609994	0.0440878	-0.218589	-0.582864	0.188174	-0.660583	0.336039	0.487815	-0.0202194	0.016519	0.171811	-0.100539	-0.0474513	0.158617	-0.0815042	0.0530419	-0.171617	0.0241635
	76	-0.0916478	-0.380121	0.609994	0.0440878	-0.218589	0.150932	-0.304324	0.314412	-0.153435	0.0411297	-0.0202194	0.016519	0.171811	-0.100539	-0.0474513	0.158617	-0.0815042	0.0530419	-0.171617	0.0241635
	77	0.226661	0.265556	-0.0742027	-0.651157	0.289784	0.150932	-0.304324	0.314412	-0.153435	0.0411297	-0.0202194	0.016519	0.171811	-0.100539	-0.0474513	0.158617	-0.0815042	0.0530419	-0.171617	0.0241635
	78	-0.262454	0.980607	0.939523	-0.323807	-0.971128	-0.416399	0.00517328	0.67505	0.463849	-0.471905	0.469184	1.10813	-0.107607	-0.773079	-0.729669	0.613518	-0.558339	0.332086	1.05787	-1.21945
	79	0.808481	0.114226	0.00803544	-0.185283	-0.704964	0.239382	1.06249	0.144901	1.20499	-2.13115	-0.308253	-0.798168	-0.835323	0.472273	1.30988	-0.412	-0.367162	-0.735211	1.76517	-0.107131
	80	0.0262892	0.31657	0.225585	0.0357792	-0.491884	0.115254	0.570496	1.19586	-0.287363	-1.09649	-0.895034	-1.37857	-0.229569	1.90516	0.686376	-0.575358	-0.533236	-0.905224	-0.0150248	1.75994
	81	0.519738	0.778263	0.721973	-0.544869	-1.18421	-0.30112	-0.232256	0.531821	0.537565	-0.343673	0.700453	0.199568	0.108871	-0.545591	-0.483928	0.689505	0.752657	0.411169	-0.506327	-1.15293
	82	-0.0172091	1.21007	-0.0696963	-0.0731167	-0.729491	-0.158828	0.279056	0.927369	-0.577013	-0.223499	0.469184	1.10813	-0.107607	-0.773079	-0.729669	0.613518	-0.558339	0.332086	1.05787	-1.21945
	83	1.38574	1.00219	-0.415669	-0.615829	-1.11996	0.921807	-1.83742	-0.87146	0.565005	0.818688	-1.33099	-0.672466	0.517363	1.47633	0.223136	1.28457	-0.483675	0.152791	-3.23658	1.80262
	84	0.603548	1.20453	-0.198119	-0.394766	-0.906882	-1.05567	-1.03459	1.22137	1.05322	0.0659449	-0.635593	0.0153703	1.16829	0.150285	-0.470765	0.974472	1.66856	-0.169941	-1.88365	-0.478927
	85	0.0262892	0.31657	0.225585	0.0357792	-0.491884	-0.317631	-0.249813	0.515646	-0.792948	0.777722	0.537554	0.215036	-0.952778	0.348845	-0.256272	0.213431	0.268668	-0.0843001	-0.935959	0.440384
	86	-0.809919	-0.813677	0.388797	0.201626	0.846485	-0.635053	1.04544	0.204695	-1.1284	0.471594	0.537554	0.215036	-0.952778	0.348845	-0.256272	-0.0992843	-0.0492473	-0.409756	0.414607	0.166627
	87	-0.564674	-0.584215	-0.620423	0.452316	1.08812	0.321638	0.78995	-0.0306769	-1.38232	0.239872	0.332865	0.0125729	0.0106323	0.147503	-0.47377	-0.0992843	-0.0492473	-0.409756	0.414607	0.166627
	88	-0.477906	-0.155177	0.974312	-0.47961	0.18985	1.17938	-1.56354	-0.61914	-0.475857	1.06709	0.332865	0.0125729	0.0106323	0.147503	-0.47377	0.762876	-0.406498	0.487528	-2.07289	0.921378
	89	0.0262892	0.31657	0.225585	0.0357792	-0.491884	-0.317631	-0.249813	0.515646	-0.792948	0.777722	-0.430904	0.217833	0.204878	0.351627	-0.253266	-0.00763441	0.0439264	0.692907	-1.13546	0.246859
	90	0.123804	0.755663	0.575205	0.199891	-1.37957	0.540293	-0.250313	0.439678	0.209931	-0.703626	0.332865	0.0125729	0.0106323	0.147503	-0.47377	0.661756	1.35065	-0.495397	-0.533088	-0.752684
	91	-0.208209	0.0971633	-0.01031	0.881126	-0.722932	0.266211	-0.541753	0.171183	-0.0797196	0.169362	-0.211711	0.611238	-0.499115	-0.388167	0.380393	0.661756	1.35065	-0.495397	-0.533088	-0.752684
	92	-0.467159	-0.145122	-0.270803	0.616427	0.200439	-0.308782	0.479614	-0.392088	0.62569	-0.385173	-0.211711	0.611238	-0.499115	-0.388167	0.380393	0.349041	1.03273	-0.820852	0.817478	-1.02644
	93	-0.53108	0.490778	0.167945	0.679952	-0.651556	0.790201	0.73544	-0.231912	-0.742807	-0.49672	0.743549	-0.188742	-0.022435	-0.304663	-0.267955	0.115889	0.188157	0.0733693	0.605351	-0.806012
	94	0.315033	-0.347466	-0.488352	0.395365	-0.0126407	-0.582864	0.188174	-0.660583	0.336039	0.487815	-0.0202194	0.016519	0.171811	-0.100539	-0.0474513	0.158617	-0.0815042	0.0530419	-0.171617	0.0241635
	95	0.315033	-0.347466	-0.488352	0.395365	-0.0126407	-0.582864	0.188174	-0.660583	0.336039	0.487815	-0.0202194	0.016519	0.171811	-0.100539	-0.0474513	0.158617	-0.0815042	0.0530419	-0.171617	0.0241635
	96	0.388096	0.0687487	-0.16333	-0.550569	0.254096	0.150932	-0.304324	0.314412	-0.153435	0.0411297	-0.0202194	0.016519	0.171811	-0.100539	-0.0474513	0.158617	-0.0815042	0.0530419	-0.171617	0.0241635
	97	0.388096	0.0687487	-0.16333	-0.550569	0.254096	0.150932	-0.304324	0.314412	-0.153435	0.0411297	-0.0202194	0.016519	0.171811	-0.100539	-0.0474513	-0.0624485	-0.306245	0.830249	-0.371117	-0.169362
	98	0.388096	0.0687487	-0.16333	-0.550569	0.254096	-0.325294	0.462057	-0.408263	-0.704824	0.736222	-0.0202194	0.016519	0.171811	-0.100539	-0.0474513	0.158617	-0.0815042	0.0530419	-0.171617	0.0241635
	99	0.388096	0.0687487	-0.16333	-0.550569	0.254096	-0.582864	0.188174	-0.660583	0.336039	0.487815	0.743549	-0.188742	-0.022435	-0.304663	-0.267955	0.158617	-0.0815042	0.0530419	-0.171617	0.0241635
	100	0.388096	0.0687487	-0.16333	-0.550569	0.254096	-0.12315	-0.595764	0.0459172	-0.443086	0.914118	0.51228	0.719823	-0.238913	-0.53215	-0.513696	0.158617	-0.0815042	0.0530419	-0.171617	0.0241635
	101	0.153598	-0.150658	-0.399225	0.294778	0.0230476	-0.599376	0.170617	-0.676757	-0.994474	1.60921	-0.251488	0.925084	-0.0446676	-0.328026	-0.293193	0.158617	-0.0815042	0.0530419	-0.171617	0.0241635
	102	0.153598	-0.150658	-0.399225	0.294778	0.0230476	-0.12315	-0.595764	0.0459172	-0.443086	0.914118	0.51228	0.719823	-0.238913	-0.53215	-0.513696	0.158617	-0.0815042	0.0530419	-0.171617	0.0241635
	103	0.153598	-0.150658	-0.399225	0.294778	0.0230476	0.150932	-0.304324	0.314412	-0.153435	0.0411297	-0.0202194	0.016519	0.171811	-0.100539	-0.0474513	0.158617	-0.0815042	0.0530419	-0.171617	0.0241635
	104	-0.394096	0.271093	0.0542199	-0.329507	0.467175	-0.440572	0.699487	-0.265034	-0.778539	0.607989	0.51228	0.719823	-0.238913	-0.53215	-0.513696	-0.154098	-0.399419	-0.272414	1.17895	-0.249594
	105	-0.394096	0.271093	0.0542199	-0.329507	0.467175	-0.440572	0.699487	-0.265034	-0.778539	0.607989	-0.251488	0.925084	-0.0446676	-0.328026	-0.293193	-0.154098	-0.399419	-0.272414	1.17895	-0.249594
	106	-0.296581	0.710185	0.40384	-0.165395	-0.420508	0.150932	-0.304324	0.314412	-0.153435	0.0411297	-0.224908	-0.185944	1.13522	-0.301881	-0.26495	-0.0624485	-0.306245	0.830249	-0.371117	-0.169362
	107	-0.394096	0.271093	0.0542199	-0.329507	0.467175	-0.12315	-0.595764	0.0459172	-0.443086	0.914118	-0.251488	0.925084	-0.0446676	-0.328026	-0.293193	0.158617	-0.0815042	0.0530419	-0.171617	0.0241635
	108	0.153598	-0.150658	-0.399225	0.294778	0.0230476	0.150932	-0.304324	0.314412	-0.153435	0.0411297	-0.0202194	0.016519	0.171811	-0.100539	-0.0474513	0.158617	-0.0815042	0.0530419	-0.171617	0.0241635
	109	0.153598	-0.150658	-0.399225	0.294778	0.0230476	-0.921038	0.188592	0.693012	0.0267672	0.144619	0.51228	0.719823	-0.238913	-0.53215	-0.513696	0.336955	0.412898	-0.703838	0.804852	-0.612487
	110	0.153598	-0.150658	-0.399225	0.294778	0.0230476	-0.582864	0.188174	-0.660583	0.336039	0.487815	-0.224908	-0.185944	1.13522	-0.301881	-0.26495	1.10747	-0.0375267	-0.909216	-0.132578	0.0620327
	111	-0.555531	0.4679	0.143347	-0.430094	0.502864	0.150932	-0.304324	0.314412	-0.153435	0.0411297	-0.224908	-0.185944	1.13522	-0.301881	-0.26495	0.428605	0.506072	0.398825	-0.745214	-0.532255
	112	-0.394096	0.271093	0.0542199	-0.329507	0.467175	-0.16649	0.990927	0.00346025	-0.488888	-0.264999	0.389159	0.421445	-1.75501	0.302145	0.387545	-0.154098	-0.399419	-0.272414	1.17895	-0.249594
	113	-0.0916478	-0.380121	0.609994	0.0440878	-0.218589	-0.372874	0.771472	1.23	0.606069	-1.60136	-0.0347234	-0.174423	-0.0876063	0.840598	-0.463612	-0.154098	-0.399419	-0.272414	1.17895	-0.249594
	114	-0.0916478	-0.380121	0.609994	0.0440878	-0.218589	0.373827	-0.0673126	-0.895955	0.0821209	0.256094	-0.0202194	0.016519	0.171811	-0.100539	-0.0474513	0.158617	-0.0815042	0.0530419	-0.171617	0.0241635
	115	0.485611	0.507842	0.18629	-0.386458	-0.633587	-1.65483	0.68109	-0.281982	0.516242	0.591304	0.307591	0.51736	0.724497	-0.733492	-0.731195	0.573684	-0.580183	-0.457465	1.01849	-0.40525
	116	-0.0916478	-0.380121	0.609994	0.0440878	-0.218589	-0.12315	-0.595764	0.0459172	-0.443086	0.914118	-0.251488	0.925084	-0.0446676	-0.328026	-0.293193	0.886399	-0.262268	-0.132009	-0.332079	-0.131493
	117	-0.555531	0.4679	0.143347	-0.430094	0.502864	0.150932	-0.304324	0.314412	-0.153435	0.0411297	-0.0202194	0.016519	0.171811	-0.100539	-0.0474513	0.886399	-0.262268	-0.132009	-0.332079	-0.131493
	118	-0.296581	0.710185	0.40384	-0.165395	-0.420508	-0.921038	0.188592	0.693012	0.0267672	0.144619	-0.183118	0.0319868	-0.889838	0.793898	0.180205	0.0976096	-1.06417	-0.952934	0.588855	1.18806
	119	-0.296581	0.710185	0.40384	-0.165395	-0.420508	-0.921038	0.188592	0.693012	0.0267672	0.144619	-0.387808	-0.170476	0.073572	0.592556	-0.0372935	0.0976096	-1.06417	-0.952934	0.588855	1.18806
	120	0.485611	0.507842	0.18629	-0.386458	-0.633587	-0.698143	0.425604	-0.517354	0.262323	0.359583	-0.387808	-0.170476	0.073572	0.592556	-0.0372935	-0.630172	-0.883408	-0.767882	0.749317	1.34372
	121	-0.394096	0.271093	0.0542199	-0.329507	0.467175	0.150932	-0.304324	0.314412	-0.153435	0.0411297	-0.0202194	0.016519	0.171811	-0.100539	-0.0474513	0.158617	-0.0815042	0.0530419	-0.171617	0.0241635
	122	-0.0809007	-0.370065	-0.63512	1.14012	-0.208	-0.599376	0.170617	-0.676757	-0.994474	1.60921	-0.00571548	0.207461	0.431228	-1.04168	0.36871	-0.332436	-0.893821	0.484466	0.202481	0.387056
	123	-0.00783764	0.0461492	-0.310098	0.19419	0.058736	0.373827	-0.0673126	-0.895955	0.0821209	0.256094	-0.0202194	0.016519	0.171811	-0.100539	-0.0474513	0.886399	-0.262268	-0.132009	-0.332079	-0.131493
	124	-0.87384	-0.177777	0.827544	0.26515	-0.00550978	-0.582864	0.188174	-0.660583	0.336039	0.487815	-0.920307	-0.873781	0.484296	1.02417	0.428952	-0.587444	-1.15307	-0.78821	-0.0276511	2.17389
	125	0.183162	1.15906	-0.369484	-0.760052	0.0521774	-0.325294	0.462057	-0.408263	-0.704824	0.736222	-0.920307	-0.873781	0.484296	1.02417	0.428952	-0.587444	-1.15307	-0.78821	-0.0276511	2.17389
	126	0.485611	0.507842	0.18629	-0.386458	-0.633587	0.150932	-0.304324	0.314412	-0.153435	0.0411297	-0.920307	-0.873781	0.484296	1.02417	0.428952	-0.0474692	0.0220826	-0.096644	-1.17485	1.06106
	127	1.17029	-0.133595	-0.38088	-0.771632	0.041016	-0.646956	0.480032	0.961507	0.316418	-0.72837	0.18447	0.218982	-0.7916	0.100803	0.170047	0.336955	0.412898	-0.703838	0.804852	-0.612487
	128	0.388096	0.0687487	-0.16333	-0.550569	0.254096	-0.646956	0.480032	0.961507	0.316418	-0.72837	0.743965	0.772393	0.887122	-3.369	0.764555	1.06804	1.15614	1.06431	1.46462	-3.99263
	129	1.17029	-0.133595	-0.38088	-0.771632	0.041016	-0.646956	0.480032	0.961507	0.316418	-0.72837	-0.0202194	0.016519	0.171811	-0.100539	-0.0474513	-0.611893	0.368921	0.258421	0.765813	-0.650356
	130	-0.87384	-0.177777	0.827544	0.26515	-0.00550978	-0.603616	-1.10666	1.00396	0.36222	0.450747	0.51228	0.719823	-0.238913	-0.53215	-0.513696	0.649671	0.730813	-0.378382	-0.545714	-0.338729
	131	-0.863093	-0.167721	-0.417571	1.36119	0.00507917	0.150932	-0.304324	0.314412	-0.153435	0.0411297	-0.224908	-0.185944	1.13522	-0.301881	-0.26495	-0.299177	0.686835	0.583876	-0.584752	-0.376598
	132	-0.296581	0.710185	0.40384	-0.165395	-0.420508	-0.921038	0.188592	0.693012	0.0267672	0.144619	-0.251488	0.925084	-0.0446676	-0.328026	-0.293193	0.115889	0.188157	0.0733693	0.605351	-0.806012
	133	0.93579	-0.353002	-0.616775	0.0737151	-0.190032	0.150932	-0.304324	0.314412	-0.153435	0.0411297	-0.402311	-0.361418	-0.185845	1.53369	-0.453454	-0.80851	-1.37781	-0.0110029	-0.227151	1.98037
	134	0.93579	-0.353002	-0.616775	0.0737151	-0.190032	-0.921038	0.188592	0.693012	0.0267672	0.144619	-0.810568	1.33281	-0.813832	0.0774399	0.144809	0.115889	0.188157	0.0733693	0.605351	-0.806012
	135	-0.00783764	0.0461492	-0.310098	0.19419	0.058736	-0.646956	0.480032	0.961507	0.316418	-0.72837	-0.224908	-0.185944	1.13522	-0.301881	-0.26495	0.336955	0.412898	-0.703838	0.804852	-0.612487
	136	-0.339851	-0.612351	-0.895613	0.875426	0.715371	-0.646956	0.480032	0.961507	0.316418	-0.72837	-0.0202194	0.016519	0.171811	-0.100539	-0.0474513	0.115889	0.188157	0.0733693	0.605351	-0.806012
	137	0.251112	0.288434	-0.0496052	0.458889	-0.864635	0.516119	0.444	-0.500406	-1.03246	0.376268	-0.183118	0.0319868	-0.889838	0.793898	0.180205	-0.360185	-0.295832	-0.422099	0.175719	0.7873
	138	0.251112	0.288434	-0.0496052	0.458889	-0.864635	0.516119	0.444	-0.500406	-1.03246	0.376268	0.51228	0.719823	-0.238913	-0.53215	-0.513696	-0.390827	0.593662	-0.518786	0.965314	-0.456831
	139	-0.00783764	0.0461492	-0.310098	0.19419	0.058736	-0.12315	-0.595764	0.0459172	-0.443086	0.914118	-0.251488	0.925084	-0.0446676	-0.328026	-0.293193	-0.569165	0.0992595	0.238093	-0.0111548	0.17982
	140	0.226661	0.265556	-0.0742027	-0.651157	0.289784	0.425014	-0.0128838	0.582906	0.136215	-0.831859	0.211049	-0.892046	0.388289	0.126948	0.19829	-0.839152	-0.488317	-0.10769	0.562443	0.736238
	141	-0.310286	0.697363	-0.865872	-0.179404	0.744501	0.425014	-0.0128838	0.582906	0.136215	-0.831859	-0.4164	0.408775	0.464295	-0.58951	0.162894	-0.363078	-0.00432738	0.387779	0.992075	-0.857074
	142	0.153598	-0.150658	-0.399225	0.294778	0.0230476	1.10762	-0.55981	0.0790398	-0.407354	-0.190592	0.948238	0.0137216	-0.985845	-0.103321	-0.0504565	0.158617	-0.0815042	0.0530419	-0.171617	0.0241635
	143	-0.00783764	0.0461492	-0.310098	0.19419	0.058736	1.10762	-0.55981	0.0790398	-0.407354	-0.190592	-0.224908	-0.185944	1.13522	-0.301881	-0.26495	-0.839152	-0.488317	-0.10769	0.562443	0.736238
	144	0.197096	-1.04416	-0.103944	0.403674	0.260654	1.10762	-0.55981	0.0790398	-0.407354	-0.190592	-0.0202194	0.016519	0.171811	-0.100539	-0.0474513	0.886399	-0.262268	-0.132009	-0.332079	-0.131493
	145	-0.87384	-0.177777	0.827544	0.26515	-0.00550978	0.150932	-0.304324	0.314412	-0.153435	0.0411297	0.18447	0.218982	-0.7916	0.100803	0.170047	0.158617	-0.0815042	0.0530419	-0.171617	0.0241635
	146	-0.87384	-0.177777	0.827544	0.26515	-0.00550978	0.150932	-0.304324	0.314412	-0.153435	0.0411297	0.18447	0.218982	-0.7916	0.100803	0.170047	0.158617	-0.0815042	0.0530419	-0.171617	0.0241635
	147	0.251112	0.288434	-0.0496052	0.458889	-0.864635	-0.582864	0.188174	-0.660583	0.336039	0.487815	0.948238	0.0137216	-0.985845	-0.103321	-0.0504565	-0.299177	0.686835	0.583876	-0.584752	-0.376598
	148	-0.296581	0.710185	0.40384	-0.165395	-0.420508	-0.308782	0.479614	-0.392088	0.62569	-0.385173	0.415739	-0.689583	-0.575121	0.32829	0.415789	0.158617	-0.0815042	0.0530419	-0.171617	0.0241635
	149	0.226661	0.265556	-0.0742027	-0.651157	0.289784	0.425014	-0.0128838	0.582906	0.136215	-0.831859	0.211049	-0.892046	0.388289	0.126948	0.19829	-0.839152	-0.488317	-0.10769	0.562443	0.736238
	150	-0.310286	0.697363	-0.865872	-0.179404	0.744501	0.425014	-0.0128838	0.582906	0.136215	-0.831859	-0.4164	0.408775	0.464295	-0.58951	0.162894	-0.363078	-0.00432738	0.387779	0.992075	-0.857074
	151	0.153598	-0.150658	-0.399225	0.294778	0.0230476	1.10762	-0.55981	0.0790398	-0.407354	-0.190592	0.948238	0.0137216	-0.985845	-0.103321	-0.0504565	0.158617	-0.0815042	0.0530419	-0.171617	0.0241635
	152	-0.00783764	0.0461492	-0.310098	0.19419	0.058736	1.10762	-0.55981	0.0790398	-0.407354	-0.190592	-0.224908	-0.185944	1.13522	-0.301881	-0.26495	-0.839152	-0.488317	-0.10769	0.562443	0.736238
	153	0.197096	-1.04416	-0.103944	0.403674	0.260654	1.10762	-0.55981	0.0790398	-0.407354	-0.190592	-0.0202194	0.016519	0.171811	-0.100539	-0.0474513	0.886399	-0.262268	-0.132009	-0.332079	-0.131493
	154	-0.87384	-0.177777	0.827544	0.26515	-0.00550978	0.150932	-0.304324	0.314412	-0.153435	0.0411297	0.18447	0.218982	-0.7916	0.100803	0.170047	0.158617	-0.0815042	0.0530419	-0.171617	0.0241635
	155	-0.87384	-0.177777	0.827544	0.26515	-0.00550978	0.150932	-0.304324	0.314412	-0.153435	0.0411297	0.18447	0.218982	-0.7916	0.100803	0.170047	0.158617	-0.0815042	0.0530419	-0.171617	0.0241635
	156	0.251112	0.288434	-0.0496052	0.458889	-0.864635	-0.582864	0.188174	-0.660583	0.336039	0.487815	0.948238	0.0137216	-0.985845	-0.103321	-0.0504565	-0.299177	0.686835	0.583876	-0.584752	-0.376598
	157	-0.296581	0.710185	0.40384	-0.165395	-0.420508	-0.308782	0.479614	-0.392088	0.62569	-0.385173	0.415739	-0.689583	-0.575121	0.32829	0.415789	0.158617	-0.0815042	0.0530419	-0.171617	0.0241635
	158	0.690544	-0.582465	0.392444	-0.176975	-0.431669	0.425014	-0.0128838	0.582906	0.136215	-0.831859	0.415739	-0.689583	-0.575121	0.32829	0.415789	0.649671	0.730813	-0.378382	-0.545714	-0.338729
	159	-0.0513359	0.939648	-0.605379	0.0852946	-0.178871	0.150932	-0.304324	0.314412	-0.153435	0.0411297	0.18447	0.218982	-0.7916	0.100803	0.170047	-1.51801	0.0552819	1.20035	-0.0501932	0.14195
	160	0.603548	1.20453	-0.198119	-0.394766	-0.906882	0.53263	0.461557	-0.484231	0.298056	-0.745127	-0.0202194	0.016519	0.171811	-0.100539	-0.0474513	0.115889	0.188157	0.0733693	0.605351	-0.806012
	161	0.0262892	0.31657	0.225585	0.0357792	-0.491884	0.0164866	0.825483	1.35527	0.969435	-2.34611	0.0461379	-1.40835	0.897251	-0.134535	0.654378	-0.363078	-0.00432738	0.387779	0.992075	-0.857074
	162	0.485611	0.507842	0.18629	-0.386458	-0.633587	-0.582864	0.188174	-0.660583	0.336039	0.487815	-0.0202194	0.016519	0.171811	-0.100539	-0.0474513	0.158617	-0.0815042	0.0530419	-0.171617	0.0241635
	163	-0.189163	-0.819214	0.260374	-0.120024	0.669093	-0.840435	-0.0857089	-0.912903	1.3769	0.239409	-0.783988	0.22178	0.366056	0.103585	0.173052	-0.569165	0.0992595	0.238093	-0.0111548	0.17982
	164	0.315033	-0.347466	-0.488352	0.395365	-0.0126407	-0.582864	0.188174	-0.660583	0.336039	0.487815	-0.783988	0.22178	0.366056	0.103585	0.173052	0.158617	-0.0815042	0.0530419	-0.171617	0.0241635
	165	-0.394096	0.271093	0.0542199	-0.329507	0.467175	0.266211	-0.541753	0.171183	-0.0797196	0.169362	0.524356	-0.582146	0.681558	0.435132	-0.901614	0.185683	0.866657	-0.990865	-0.96272	0.840627
	166	-0.394096	0.271093	0.0542199	-0.329507	0.467175	-0.0512117	0.753497	-0.139768	-0.415173	-0.136767	-0.0347234	-0.174423	-0.0876063	0.840598	-0.463612	-0.348099	0.324001	-0.539114	0.188346	0.373345
	167	-0.467159	-0.145122	-0.270803	0.616427	0.200439	0.266211	-0.541753	0.171183	-0.0797196	0.169362	-0.4164	0.408775	0.464295	-0.58951	0.162894	0.440691	1.1259	0.28181	-0.732588	-0.946209
	168	0.197096	-1.04416	-0.103944	0.403674	0.260654	1.10762	-0.55981	0.0790398	-0.407354	-0.190592	-0.0202194	0.016519	0.171811	-0.100539	-0.0474513	0.886399	-0.262268	-0.132009	-0.332079	-0.131493
	169	-0.87384	-0.177777	0.827544	0.26515	-0.00550978	0.150932	-0.304324	0.314412	-0.153435	0.0411297	0.18447	0.218982	-0.7916	0.100803	0.170047	0.158617	-0.0815042	0.0530419	-0.171617	0.0241635
	170	-0.87384	-0.177777	0.827544	0.26515	-0.00550978	0.150932	-0.304324	0.314412	-0.153435	0.0411297	0.18447	0.218982	-0.7916	0.100803	0.170047	0.158617	-0.0815042	0.0530419	-0.171617	0.0241635
	171	0.251112	0.288434	-0.0496052	0.458889	-0.864635	-0.582864	0.188174	-0.660583	0.336039	0.487815	0.948238	0.0137216	-0.985845	-0.103321	-0.0504565	-0.299177	0.686835	0.583876	-0.584752	-0.376598
	172	-0.296581	0.710185	0.40384	-0.165395	-0.420508	-0.308782	0.479614	-0.392088	0.62569	-0.385173	0.415739	-0.689583	-0.575121	0.32829	0.415789	0.158617	-0.0815042	0.0530419	-0.171617	0.0241635
	173	0.226661	0.265556	-0.0742027	-0.651157	0.289784	0.425014	-0.0128838	0.582906	0.136215	-0.831859	0.211049	-0.892046	0.388289	0.126948	0.19829	-0.839152	-0.488317	-0.10769	0.562443	0.736238
	174	-0.310286	0.697363	-0.865872	-0.179404	0.744501	0.425014	-0.0128838	0.582906	0.136215	-0.831859	-0.4164	0.408775	0.464295	-0.58951	0.162894	-0.363078	-0.00432738	0.387779	0.992075	-0.857074
	175	0.153598	-0.150658	-0.399225	0.294778	0.0230476	1.10762	-0.55981	0.0790398	-0.407354	-0.190592	0.948238	0.0137216	-0.985845	-0.103321	-0.0504565	0.158617	-0.0815042	0.0530419	-0.171617	0.0241635
	176	-0.00783764	0.0461492	-0.310098	0.19419	0.058736	1.10762	-0.55981	0.0790398	-0.407354	-0.190592	-0.224908	-0.185944	1.13522	-0.301881	-0.26495	-0.839152	-0.488317	-0.10769	0.562443	0.736238
	177	0.197096	-1.04416	-0.103944	0.403674	0.260654	1.10762	-0.55981	0.0790398	-0.407354	-0.190592	-0.0202194	0.016519	0.171811	-0.100539	-0.0474513	0.886399	-0.262268	-0.132009	-0.332079	-0.131493
	178	-0.87384	-0.177777	0.827544	0.26515	-0.00550978	0.150932	-0.304324	0.314412	-0.153435	0.0411297	0.18447	0.218982	-0.7916	0.100803	0.170047	0.158617	-0.0815042	0.0530419	-0.171617	0.0241635
	179	-0.87384	-0.177777	0.827544	0.26515	-0.00550978	0.150932	-0.304324	0.314412	-0.153435	0.0411297	0.18447	0.218982	-0.7916	0.100803	0.170047	0.158617	-0.0815042	0.0530419	-0.171617	0.0241635
	180	0.251112	0.288434	-0.0496052	0.458889	-0.864635	-0.582864	0.188174	-0.660583	0.336039	0.487815	0.948238	0.0137216	-0.985845	-0.103321	-0.0504565	-0.299177	0.686835	0.583876	-0.584752	-0.376598
	181	0.485611	0.507842	0.18629	-0.386458	-0.633587	-0.582864	0.188174	-0.660583	0.336039	0.487815	-0.0202194	0.016519	0.171811	-0.100539	-0.0474513	0.158617	-0.0815042	0.0530419	-0.171617	0.0241635
	182	-0.189163	-0.819214	0.260374	-0.120024	0.669093	-0.840435	-0.0857089	-0.912903	1.3769	0.239409	-0.783988	0.22178	0.366056	0.103585	0.173052	-0.569165	0.0992595	0.238093	-0.0111548	0.17982
	183	0.315033	-0.347466	-0.488352	0.395365	-0.0126407	-0.582864	0.188174	-0.660583	0.336039	0.487815	-0.783988	0.22178	0.366056	0.103585	0.173052	0.158617	-0.0815042	0.0530419	-0.171617	0.0241635
	184	-0.394096	0.271093	0.0542199	-0.329507	0.467175	0.266211	-0.541753	0.171183	-0.0797196	0.169362	0.524356	-0.582146	0.681558	0.435132	-0.901614	0.185683	0.866657	-0.990865	-0.96272	0.840627
	185	-0.394096	0.271093	0.0542199	-0.329507	0.467175	-0.0512117	0.753497	-0.139768	-0.415173	-0.136767	-0.0347234	-0.174423	-0.0876063	0.840598	-0.463612	-0.348099	0.324001	-0.539114	0.188346	0.373345
	186	-0.467159	-0.145122	-0.270803	0.616427	0.200439	0.266211	-0.541753	0.171183	-0.0797196	0.169362	-0.4164	0.408775	0.464295	-0.58951	0.162894	0.440691	1.1259	0.28181	-0.732588	-0.946209
	187	0.197096	-1.04416	-0.103944	0.403674	0.260654	1.10762	-0.55981	0.0790398	-0.407354	-0.190592	-0.0202194	0.016519	0.171811	-0.100539	-0.0474513	0.886399	-0.262268	-0.132009	-0.332079	-0.131493
	188	-0.87384	-0.177777	0.827544	0.26515	-0.00550978	0.150932	-0.304324	0.314412	-0.153435	0.0411297	0.18447	0.218982	-0.7916	0.100803	0.170047	0.158617	-0.0815042	0.0530419	-0.171617	0.0241635
	189	-0.87384	-0.177777	0.827544	0.26515	-0.00550978	0.150932	-0.304324	0.314412	-0.153435	0.0411297	0.18447	0.218982	-0.7916	0.100803	0.170047	0.158617	-0.0815042	0.0530419	-0.171617	0.0241635
	190	0.251112	0.288434	-0.0496052	0.458889	-0.864635	-0.582864	0.188174	-0.660583	0.336039	0.487815	0.948238	0.0137216	-0.985845	-0.103321	-0.0504565	-0.299177	0.686835	0.583876	-0.584752	-0.376598
	191	-0.296581	0.710185	0.40384	-0.165395	-0.420508	-0.308782	0.479614	-0.392088	0.62569	-0.385173	0.415739	-0.689583	-0.575121	0.32829	0.415789	0.158617	-0.0815042	0.0530419	-0.171617	0.0241635
	192	0.226661	0.265556	-0.0742027	-0.651157	0.289784	0.425014	-0.0128838	0.582906	0.136215	-0.831859	0.211049	-0.892046	0.388289	0.126948	0.19829	-0.839152	-0.488317	-0.10769	0.562443	0.736238
	193	-0.310286	0.697363	-0.865872	-0.179404	0.744501	0.425014	-0.0128838	0.582906	0.136215	-0.831859	-0.4164	0.408775	0.464295	-0.58951	0.162894	-0.363078	-0.00432738	0.387779	0.992075	-0.857074
	194	0.153598	-0.150658	-0.399225	0.294778	0.0230476	1.10762	-0.55981	0.0790398	-0.407354	-0.190592	0.948238	0.0137216	-0.985845	-0.103321	-0.0504565	0.158617	-0.0815042	0.0530419	-0.171617	0.0241635
	195	0.251112	0.288434	-0.0496052	0.458889	-0.864635	-0.582864	0.188174	-0.660583	0.336039	0.487815	0.948238	0.0137216	-0.985845	-0.103321	-0.0504565	-0.299177	0.686835	0.583876	-0.584752	-0.376598
	196	-0.296581	0.710185	0.40384	-0.165395	-0.420508	-0.308782	0.479614	-0.392088	0.62569	-0.385173	0.415739	-0.689583	-0.575121	0.32829	0.415789	0.158617	-0.0815042	0.0530419	-0.171617	0.0241635
	197	0.226661	0.265556	-0.0742027	-0.651157	0.289784	0.425014	-0.0128838	0.582906	0.136215	-0.831859	0.211049	-0.892046	0.388289	0.126948	0.19829	-0.839152	-0.488317	-0.10769	0.562443	0.736238
	198	-0.310286	0.697363	-0.865872	-0.179404	0.744501	0.425014	-0.0128838	0.582906	0.136215	-0.831859	-0.4164	0.408775	0.464295	-0.58951	0.162894	-0.363078	-0.00432738	0.387779	0.992075	-0.857074
	199	0.153598	-0.150658	-0.399225	0.294778	0.0230476	1.10762	-0.55981	0.0790398	-0.407354	-0.190592	0.948238	0.0137216	-0.985845	-0.103321	-0.0504565	0.158617	-0.0815042	0.0530419	-0.171617	0.0241635
	Outer model correlations
		CW1	CW2	CW3	CW4	CW5	EE1	EE2	EE3	EE4	EE5	HC1	HC2	HC3	HC4	HC5	IS1	IS2	IS3	IS4	IS5
	CW1	1	-0.0836409	-0.4189	-0.346263	-0.226841	-0.053675	0.0397215	-0.211026	0.175363	0.0356007	-0.0608236	-0.100934	0.11341	0.0122586	0.0480624	0.0619625	-0.0220511	0.0317931	-0.0767203	0.0143252
	CW2	-0.0836409	1	-0.0536927	-0.318117	-0.454045	-0.0567936	0.0705061	0.284605	0.056806	-0.215942	0.0893884	-0.107031	-0.0179135	0.0788787	-0.0542805	-0.152088	-0.0004888	0.0424619	0.0983888	-0.00602321
	CW3	-0.4189	-0.0536927	1	-0.0869618	-0.310879	-0.0483744	-0.0674739	0.0893924	0.0643959	-0.0180792	0.149431	-0.0770597	-0.218469	0.155156	0.000115076	0.212975	-0.0438633	-0.0917034	-0.156899	0.0679933
	CW4	-0.346263	-0.318117	-0.0869618	1	-0.178955	0.0541412	-0.0925634	-0.0619039	-0.117756	0.131393	0.0320673	0.207861	-0.1878	-0.0968221	0.0574473	0.0523616	0.197756	0.0427458	-0.0738442	-0.114855
	CW5	-0.226841	-0.454045	-0.310879	-0.178955	1	0.0920569	0.0366898	-0.0646052	-0.165114	0.0532688	-0.168212	0.0726695	0.246527	-0.123714	-0.0474397	-0.148111	-0.10947	-0.0262478	0.179277	0.0326264
	EE1	-0.053675	-0.0567936	-0.0483744	0.0541412	0.0920569	1	-0.458324	0.182205	-0.410651	-0.334381	0.1502	-0.209888	0.0363376	0.0404985	-0.0233588	0.0722464	-0.145322	0.0501261	-0.111374	0.0946554
	EE2	0.0397215	0.0705061	-0.0674739	-0.0925634	0.0366898	-0.458324	1	-0.127601	0.115031	-0.267656	0.064438	-0.202046	-0.0883894	0.0945229	0.184479	-0.262107	-0.057486	-0.177955	0.605228	-0.164646
	EE3	-0.211026	0.284605	0.0893924	-0.0619039	-0.0646052	0.182205	-0.127601	1	-0.147704	-0.593485	0.0622844	-0.0891759	0.0464923	-0.0137796	-0.0105516	0.0509064	0.0441047	-0.0451207	0.218837	-0.199177
	EE4	0.175363	0.056806	0.0643959	-0.117756	-0.165114	-0.410651	0.115031	-0.147704	1	-0.309366	-0.182419	-0.199163	0.133806	-0.0206095	0.360824	-0.0738905	0.19135	0.0751045	0.0738043	-0.165599
	EE5	0.0356007	-0.215942	-0.0180792	0.131393	0.0532688	-0.334381	-0.267656	-0.593485	-0.309366	1	-0.0776537	0.474259	-0.0884809	-0.0686776	-0.324817	0.124556	-0.00311376	0.0526691	-0.479159	0.262545
	HC1	-0.0608236	0.0893884	0.149431	0.0320673	-0.168212	0.1502	0.064438	0.0622844	-0.182419	-0.0776537	1	-0.0798133	-0.470715	-0.248256	-0.292013	0.146737	0.201576	0.0791592	-0.00502832	-0.250697
	HC2	-0.100934	-0.107031	-0.0770597	0.207861	0.0726695	-0.209888	-0.202046	-0.0891759	-0.199163	0.474259	-0.0798133	1	-0.197573	-0.513807	-0.309912	0.220013	0.162019	0.209401	0.126491	-0.452627
	HC3	0.11341	-0.0179135	-0.218469	-0.1878	0.246527	0.0363376	-0.0883894	0.0464923	0.133806	-0.0884809	-0.470715	-0.197573	1	-0.219888	-0.178821	-0.0225807	-0.0214406	-0.0501205	0.0538707	0.0146577
	HC4	0.0122586	0.0788787	0.155156	-0.0968221	-0.123714	0.0404985	0.0945229	-0.0137796	-0.0206095	-0.0686776	-0.248256	-0.513807	-0.219888	1	0.0479865	-0.222736	-0.298478	-0.357969	-0.297176	0.752912
	HC5	0.0480624	-0.0542805	0.000115076	0.0574473	-0.0474397	-0.0233588	0.184479	-0.0105516	0.360824	-0.324817	-0.292013	-0.309912	-0.178821	0.0479865	1	-0.179876	-0.0805691	0.138206	0.144313	-0.0350149
	IS1	0.0619625	-0.152088	0.212975	0.0523616	-0.148111	0.0722464	-0.262107	0.0509064	-0.0738905	0.124556	0.146737	0.220013	-0.0225807	-0.222736	-0.179876	1	0.230141	-0.176999	-0.370995	-0.364658
	IS2	-0.0220511	-0.0004888	-0.0438633	0.197756	-0.10947	-0.145322	-0.057486	0.0441047	0.19135	-0.00311376	0.201576	0.162019	-0.0214406	-0.298478	-0.0805691	0.230141	1	0.0565337	-0.270866	-0.543375
	IS3	0.0317931	0.0424619	-0.0917034	0.0427458	-0.0262478	0.0501261	-0.177955	-0.0451207	0.0751045	0.0526691	0.0791592	0.209401	-0.0501205	-0.357969	0.138206	-0.176999	0.0565337	1	-0.157107	-0.395653
	IS4	-0.0767203	0.0983888	-0.156899	-0.0738442	0.179277	-0.111374	0.605228	0.218837	0.0738043	-0.479159	-0.00502832	0.126491	0.0538707	-0.297176	0.144313	-0.370995	-0.270866	-0.157107	1	-0.29104
	IS5	0.0143252	-0.00602321	0.0679933	-0.114855	0.0326264	0.0946554	-0.164646	-0.199177	-0.165599	0.262545	-0.250697	-0.452627	0.0146577	0.752912	-0.0350149	-0.364658	-0.543375	-0.395653	-0.29104	1
	Outer model descriptives
		Mean	Median	Observed min	Observed max	Standard deviation	Excess kurtosis	Skewness	Number of observations used	Cramér-von Mises test statistic	Cramér-von Mises p value
	CW1	-1.24345e-16	0.0262892	-0.87384	1.38574	0.445169	-0.0157695	-0.00844452	200	0.168522	0.0134646
	CW2	-1.24761e-16	0.0461492	-1.26808	1.21007	0.545947	-0.336368	-0.107359	200	0.251671	0.00121692
	CW3	3.67484e-16	-0.0496052	-0.895613	1.0337	0.434274	-0.366035	0.253077	200	0.165333	0.0148172
	CW4	-1.02141e-16	0.0357792	-0.771632	1.36119	0.402714	-0.238545	0.287138	200	0.360726	6.81531e-05
	CW5	-4.71845e-18	0.0230476	-1.37957	1.08812	0.470741	-0.233265	-0.383147	200	0.420897	1.58434e-05
	EE1	-6.43929e-17	0.150932	-1.65483	1.17938	0.55232	-0.308752	0.193283	200	0.446939	8.6732e-06
	EE2	-3.81362e-16	-0.0128838	-1.83742	1.06249	0.462869	0.824996	-0.250391	200	0.378367	4.40059e-05
	EE3	1.72085e-16	0.0790398	-0.912903	1.54095	0.577151	-0.723961	0.180891	200	0.570618	6.2979e-07
	EE4	1.22402e-16	0.0267672	-1.38232	1.3769	0.473144	0.659411	0.0399296	200	0.330172	0.00014817
	EE5	3.05311e-17	0.0411297	-2.34611	1.60921	0.594668	2.33404	-0.829375	200	0.522431	1.6695e-06
	HC1	-1.2601e-16	-0.0202194	-1.33099	0.948238	0.457801	0.187572	-0.0514716	200	0.65466	1.32744e-07
	HC2	4.87804e-17	0.016519	-1.40835	1.33281	0.476109	0.917218	-0.364454	200	1.62086	7.37e-10
	HC3	3.10862e-17	0.171811	-1.75501	1.16829	0.554482	-0.100153	-0.323578	200	1.13833	7.37e-10
	HC4	-1.87905e-16	-0.100539	-3.369	1.90516	0.484995	12.4594	-0.843175	200	1.58341	7.37e-10
	HC5	9.75608e-17	-0.0474513	-0.901614	1.30988	0.327962	1.63964	0.19432	200	1.01683	1.30073e-09
	IS1	9.4369e-17	0.158617	-1.51801	1.28457	0.48352	0.312972	-0.162677	200	1.24173	7.37e-10
	IS2	-4.1217e-17	-0.0815042	-1.37781	1.66856	0.456182	1.95462	0.517199	200	1.78474	7.37e-10
	IS3	6.55725e-17	0.0530419	-1.31632	1.20035	0.41242	1.4387	-0.409228	200	1.52402	7.37e-10
	IS4	-8.27116e-17	-0.171617	-3.23658	1.76517	0.61318	4.14247	-0.593697	200	1.6384	7.37e-10
	IS5	-3.747e-17	0.0241635	-3.99263	2.17389	0.642503	8.21579	-0.562488	200	1.82592	7.37e-10
	Inner model scores
		CW	HC
	0	1.08953	0.584127
	1	1.20837	-0.5014
	2	-0.220881	0.0622454
	3	0.902791	0.96198
	4	0.861928	-0.0879813
	5	0.0230326	-0.118612
	6	0.0230326	-0.118612
	7	1.13153	-0.16248
	8	0.934666	-0.217477
	9	0.779321	-0.661607
	10	0.20825	-0.00734074
	11	-2.00916	-0.850961
	12	-0.81536	-0.849198
	13	0.832734	0.212932
	14	-0.665047	0.0702237
	15	-1.10047	-0.0204814
	16	0.157732	0.557422
	17	0.274822	-0.417089
	18	-0.383549	-0.35852
	19	-0.542047	-0.0413299
	20	-0.824925	-0.181338
	21	-0.390933	-0.363582
	22	-0.644439	-0.263291
	23	-0.679182	0.0795272
	24	-0.866638	-0.627626
	25	0.151474	0.203182
	26	0.678038	-0.217268
	27	-0.90565	-0.400088
	28	0.451964	-0.889952
	29	-0.0821739	0.251915
	30	-0.0970761	0.398961
	31	-0.983221	0.159801
	32	0.177866	0.0690956
	33	-1.11537	0.126564
	34	-0.841488	0.126564
	35	-1.2588	0.725617
	36	-1.2588	0.725617
	37	-0.947861	0.359978
	38	-0.721259	-0.103668
	39	-0.826183	0.126564
	40	-0.658676	0.359978
	41	-0.507433	0.160376
	42	0.317911	-0.947132
	43	-0.289516	0.269273
	44	-0.0606545	0.269273
	45	-0.173399	0.212932
	46	-0.74009	-0.599909
	47	-0.632552	0.258666
	48	-0.07161	0.649875
	49	-0.507433	0.160376
	50	-0.507433	0.160376
	51	-0.507433	0.160376
	52	-0.492255	0.167961
	53	-0.917654	0.212932
	54	-0.507433	0.160376
	55	-1.25742	-0.250714
	56	-0.488905	-0.0224439
	57	-0.995542	-0.250714
	58	-0.483084	0.885616
	59	-0.346744	0.83306
	60	-0.71882	-0.0116202
	61	1.11165	-0.848266
	62	-0.376138	0.11162
	63	-0.278571	0.160376
	64	-0.0166927	0.160376
	65	0.0884792	0.212932
	66	-0.74532	0.124602
	67	-0.376138	0.11162
	68	0.159621	0.11162
	69	0.265995	-0.121793
	70	-0.355772	0.11162
	71	0.206074	0.0252524
	72	0.508164	-0.280021
	73	0.289353	0.0783838
	74	0.260899	0.464025
	75	0.36236	0.212932
	76	0.159621	0.11162
	77	0.919181	0.11162
	78	-0.716494	-0.693842
	79	-0.231858	-0.785862
	80	-0.290859	-0.026283
	81	0.211597	-0.604094
	82	-0.87763	-0.637502
	83	0.546517	0.680818
	84	0.345807	-0.528537
	85	0.21395	0.274305
	86	-0.0799733	-0.0537408
	87	-0.563949	0.123935
	88	0.75738	1.02456
	89	0.233927	0.0883041
	90	0.557038	-0.958514
	91	-0.586339	-0.405933
	92	-0.522633	-0.790319
	93	0.379352	-0.561207
	94	-1.20684	0.212932
	95	-1.20684	0.212932
	96	-0.376138	0.11162
	97	-0.35761	-0.0711995
	98	-0.0606545	0.269273
	99	-0.279773	0.446346
	100	-0.721032	0.545211
	101	-0.0372968	0.469449
	102	-0.459154	0.545211
	103	-0.114259	0.11162
	104	-1.07528	0.217165
	105	-0.968905	-0.0162487
	106	0.302087	0.159033
	107	-0.856171	0.311797
	108	-0.114259	0.11162
	109	-0.747457	-0.23075
	110	-0.0200701	0.478939
	111	0.626015	-0.183786
	112	-0.520537	-0.67689
	113	0.446995	-1.33775
	114	0.257188	0.160376
	115	0.0747723	0.296567
	116	-0.0639973	0.164752
	117	0.692571	-0.0354252
	118	-0.581116	0.353491
	119	-0.68604	0.583724
	120	-0.361864	0.779525
	121	-0.61765	0.11162
	122	-0.182059	1.62832
	123	1.29353	0.0133304
	124	-0.353909	1.35727
	125	-0.306549	1.41361
	126	0.26178	0.204682
	127	-0.318005	-0.894572
	128	-0.333992	-0.919287
	129	-0.419303	-0.700115
	130	-0.602354	0.0972962
	131	-0.160449	-0.0367402
	132	-0.119813	-0.646983
	133	-0.0634499	0.490503
	134	-0.169746	-1.11063
	135	0.787833	-0.434108
	136	0.16703	-0.84716
	137	0.0657821	0.0274383
	138	0.348914	-0.0311644
	139	0.927636	0.458843
	140	1.08953	0.584127
	141	1.20837	-0.5014
	142	-0.220881	0.0622454
	143	0.902791	0.96198
	144	0.861928	-0.0879813
	145	0.0230326	-0.118612
	146	0.0230326	-0.118612
	147	1.13153	-0.16248
	148	0.934666	-0.217477
	149	1.08953	0.584127
	150	1.20837	-0.5014
	151	-0.220881	0.0622454
	152	0.902791	0.96198
	153	0.861928	-0.0879813
	154	0.0230326	-0.118612
	155	0.0230326	-0.118612
	156	1.13153	-0.16248
	157	0.934666	-0.217477
	158	0.779321	-0.661607
	159	0.20825	-0.00734074
	160	-2.00916	-0.850961
	161	-0.81536	-0.849198
	162	0.832734	0.212932
	163	-0.665047	0.0702237
	164	-1.10047	-0.0204814
	165	0.157732	0.557422
	166	0.274822	-0.417089
	167	-0.383549	-0.35852
	168	0.861928	-0.0879813
	169	0.0230326	-0.118612
	170	0.0230326	-0.118612
	171	1.13153	-0.16248
	172	0.934666	-0.217477
	173	1.08953	0.584127
	174	1.20837	-0.5014
	175	-0.220881	0.0622454
	176	0.902791	0.96198
	177	0.861928	-0.0879813
	178	0.0230326	-0.118612
	179	0.0230326	-0.118612
	180	1.13153	-0.16248
	181	0.832734	0.212932
	182	-0.665047	0.0702237
	183	-1.10047	-0.0204814
	184	0.157732	0.557422
	185	0.274822	-0.417089
	186	-0.383549	-0.35852
	187	0.861928	-0.0879813
	188	0.0230326	-0.118612
	189	0.0230326	-0.118612
	190	1.13153	-0.16248
	191	0.934666	-0.217477
	192	1.08953	0.584127
	193	1.20837	-0.5014
	194	-0.220881	0.0622454
	195	1.13153	-0.16248
	196	0.934666	-0.217477
	197	1.08953	0.584127
	198	1.20837	-0.5014
	199	-0.220881	0.0622454
	Inner model correlation
		CW	HC
	CW	1	1.7053e-15
	HC	1.7053e-15	1
	Inner model descriptives
		Mean	Median	Observed min	Observed max	Standard deviation	Excess kurtosis	Skewness	Number of observations used	Cramér-von Mises test statistic	Cramér-von Mises p value
	CW	1.50158e-16	-0.0489756	-2.00916	1.29353	0.704394	-0.569033	-5.80221e-07	200	0.219755	0.00299782
	HC	1.55431e-16	0.0192914	-1.33775	1.62832	0.47273	0.856333	0.178753	200	0.319875	0.000193547
	Quality criteria
	R-square
	Overview
		R-square	R-square adjusted
	CW	0.503828	0.496234
	HC	0.776526	0.774257
	f-square
	Matrix
		CW	EE	HC	IS
	CW
	EE	0.079589		0.0461642
	HC	0.0935428
	IS	0.00194815		0.727544
	List
		f-square
	EE -> CW	0.079589
	EE -> HC	0.0461642
	HC -> CW	0.0935428
	IS -> CW	0.00194815
	IS -> HC	0.727544
	Construct reliability and validity
	Overview
		Cronbach's alpha	Composite reliability (rho_a)	Composite reliability (rho_c)	Average variance extracted (AVE)
	CW	0.93213	0.939719	0.948397	0.78628
	EE	0.900301	0.908701	0.925728	0.714019
	HC	0.930199	0.935203	0.947313	0.782702
	IS	0.901451	0.904253	0.927474	0.719843
	Discriminant validity
	Heterotrait-monotrait ratio (HTMT) - Matrix
		CW	EE	HC	IS
	CW
	EE	0.711465
	HC	0.717427	0.826322
	IS	0.673912	0.911506	0.941202
	Heterotrait-monotrait ratio (HTMT) - List
		Heterotrait-monotrait ratio (HTMT)
	EE <-> CW	0.711465
	HC <-> CW	0.717427
	HC <-> EE	0.826322
	IS <-> CW	0.673912
	IS <-> EE	0.911506
	IS <-> HC	0.941202
	Fornell-Larcker criterion
		CW	EE	HC	IS
	CW	0.886724
	EE	0.661057	0.844997
	HC	0.677428	0.783543	0.884704
	IS	0.628604	0.830502	0.875334	0.848436
	Cross loadings
		CW	EE	HC	IS
	CW1	0.895447	0.607537	0.655903	0.617254
	CW2	0.83782	0.481166	0.453029	0.425959
	CW3	0.900781	0.55466	0.585715	0.556163
	CW4	0.915326	0.630169	0.633464	0.60477
	CW5	0.882272	0.632323	0.640994	0.554299
	EE1	0.636382	0.833632	0.591059	0.591753
	EE2	0.51086	0.886427	0.661408	0.789943
	EE3	0.522176	0.816638	0.436106	0.537026
	EE4	0.545157	0.880985	0.642325	0.736445
	EE5	0.562753	0.803972	0.879386	0.795616
	HC1	0.665605	0.701269	0.889054	0.802518
	HC2	0.562753	0.803972	0.879386	0.795616
	HC3	0.563507	0.623474	0.832196	0.644467
	HC4	0.552926	0.562286	0.874517	0.766284
	HC5	0.643272	0.75881	0.944691	0.846509
	IS1	0.498179	0.669055	0.696395	0.875333
	IS2	0.498276	0.667271	0.672346	0.889887
	IS3	0.583302	0.750084	0.759415	0.910994
	IS4	0.51086	0.886427	0.661408	0.789943
	IS5	0.552926	0.562286	0.874517	0.766284
	Collinearity statistics (VIF)
	Outer model - List
		VIF
	CW1	3.26655
	CW2	2.71316
	CW3	3.73982
	CW4	3.97857
	CW5	3.02597
	EE1	2.58539
	EE2	3.50941
	EE3	2.91112
	EE4	3.31655
	EE5	1.95146
	HC1	3.31096
	HC2	3.18402
	HC3	2.47335
	HC4	3.45913
	HC5	5.85608
	IS1	3.56313
	IS2	4.48564
	IS3	3.95894
	IS4	1.94949
	IS5	1.6394
	Inner model - Matrix
		CW	EE	HC	IS
	CW
	EE	3.37182		3.22303
	HC	4.47479
	IS	5.56793		3.22303
	Inner model - List
		VIF
	EE -> CW	3.37182
	EE -> HC	3.22303
	HC -> CW	4.47479
	IS -> CW	5.56793
	IS -> HC	3.22303
	Model fit
	Fit summary
		Saturated model	Estimated model
	SRMR	0.100438	0.100438
	d_ULS	2.11843	2.11843
	d_G	n/a	n/a
	Chi-square	infinite	infinite
	NFI	n/a	n/a
	Model selection criteria
	Matrix
		BIC (Bayesian information criterion)
	CW	-119.976
	HC	-284.8
	Algorithm
	Setting
	Data file
		Setting
	Data file	Data Penelitian ERJ
	Weighting vector	-
	PLS-SEM algorithm
		Setting
	Initial weights	1.0
	Max. number of iterations	3000
	Stop criterion	10⁻⁷
	Type of results	Standardized
	Use Lohmoeller settings?	No
	Weighting scheme	Path
	Construct outer weighting mode
		Setting
	CW	AUTOMATIC
	EE	AUTOMATIC
	HC	AUTOMATIC
	IS	AUTOMATIC
	Stop criterion changes
	Matrix
		CW1	CW2	CW3	CW4	CW5	EE1	EE2	EE3	EE4	EE5	HC1	HC2	HC3	HC4	HC5	IS1	IS2	IS3	IS4	IS5
	Iteration 0	0.22552	0.22552	0.22552	0.22552	0.22552	0.236541	0.236541	0.236541	0.236541	0.236541	0.226204	0.226204	0.226204	0.226204	0.226204	0.236152	0.236152	0.236152	0.236152	0.236152
	Iteration 1	0.241295	0.180125	0.217798	0.24035	0.245768	0.240806	0.232823	0.188277	0.235464	0.28817	0.241518	0.228575	0.198733	0.213203	0.246045	0.223889	0.218783	0.250403	0.218711	0.27202
	Iteration 2	0.241856	0.178548	0.218079	0.241345	0.245377	0.240799	0.233214	0.187182	0.235294	0.289046	0.240297	0.228637	0.199325	0.213924	0.245948	0.224302	0.219213	0.250735	0.218823	0.270539
	Iteration 3	0.241886	0.178515	0.218071	0.241349	0.245382	0.240795	0.233205	0.187146	0.235308	0.289081	0.240315	0.22872	0.199333	0.21381	0.245952	0.224306	0.219204	0.250723	0.218799	0.270585
	Iteration 4	0.241886	0.178512	0.218071	0.241351	0.245382	0.240794	0.233204	0.187146	0.235308	0.289084	0.240314	0.228721	0.199334	0.21381	0.245952	0.224308	0.219206	0.250725	0.218801	0.270576
	Iteration 5	0.241887	0.178512	0.218071	0.241351	0.245382	0.240794	0.233204	0.187146	0.235308	0.289084	0.240314	0.228721	0.199334	0.21381	0.245952	0.224308	0.219206	0.250725	0.218801	0.270576
	Iteration 6	0.241887	0.178512	0.218071	0.241351	0.245382	0.240794	0.233204	0.187146	0.235308	0.289084	0.240314	0.228721	0.199334	0.21381	0.245952	0.224308	0.219206	0.250725	0.218801	0.270576
	Posthoc minimum sample size
	List
		Path coefficients	Alpha 1%, power 80%	Alpha 5%, power 80%	Alpha 1%, power 90%	Alpha 5%, power 90%
	EE -> CW	0.364901	76	47	98	65
	EE -> HC	0.182347	302	186	392	258
	HC -> CW	0.45573	49	30	63	42
	IS -> CW	-0.0733625	1865	1149	2419	1592
	IS -> HC	0.723895	20	12	25	17
	Execution log
	Reading score matrix of complete data set
	Calculating full data set.
	Running PLS-SEM iterations, at most 3000.
	Calculating report matrices and charts.
	All calculations done.
	Model and data
	Inner model
		CW	EE	HC	IS
	CW
	EE	1		1
	HC	1
	IS	1		1
	Outer model
		CW	EE	HC	IS
	CW1	-1
	CW2	-1
	CW3	-1
	CW4	-1
	CW5	-1
	EE1		-1
	EE2		-1
	EE3		-1
	EE4		-1
	EE5		-1
	HC1			-1
	HC2			-1
	HC3			-1
	HC4			-1
	HC5			-1
	IS1				-1
	IS2				-1
	IS3				-1
	IS4				-1
	IS5				-1
	Indicator data (original)
	Matrix
	Case index	CW1	CW2	CW3	CW4	CW5	EE1	EE2	EE3	EE4	EE5	HC1	HC2	HC3	HC4	HC5	IS1	IS2	IS3	IS4	IS5
	0	5	5	5	4	5	4	4	4	4	3	4	3	4	4	4	2	3	3	4	4
	1	4	5	4	4	5	4	4	4	4	3	2	3	3	3	3	2	3	3	4	3
	2	4	4	4	4	4	5	4	4	4	4	5	4	3	4	4	4	4	4	4	4
	3	5	5	5	5	5	5	4	4	4	4	4	4	5	4	4	2	3	3	4	4
	4	5	4	5	5	5	5	4	4	4	4	4	4	4	4	4	5	4	4	4	4
	5	3	4	5	4	4	4	4	4	4	4	4	4	3	4	4	4	4	4	4	4
	6	3	4	5	4	4	4	4	4	4	4	4	4	3	4	4	4	4	4	4	4
	7	5	5	5	5	4	3	4	3	4	4	5	4	3	4	4	4	5	5	4	4
	8	4	5	5	4	4	3	4	3	4	3	4	3	3	4	4	4	4	4	4	4
	9	5	4	5	4	4	4	4	4	4	3	4	3	3	4	4	5	5	4	4	4
	10	4	5	4	4	4	4	4	4	4	4	4	4	3	4	4	2	4	5	4	4
	11	3	4	3	2	2	5	5	4	5	4	4	4	4	4	4	5	5	5	5	4
	12	2	3	3	2	2	3	4	4	4	1	2	1	3	3	3	2	3	3	4	3
	13	5	5	5	4	4	3	4	3	4	4	4	4	4	4	4	4	4	4	4	4
	14	3	3	4	3	4	3	4	3	5	4	3	4	4	4	4	3	4	4	4	4
	15	3	3	3	3	3	3	4	3	4	4	3	4	4	4	4	4	4	4	4	4
	16	3	4	4	3	4	3	3	3	3	3	4	3	4	4	3	3	4	2	3	4
	17	3	4	4	3	4	3	4	3	3	3	3	3	3	4	3	3	4	3	4	4
	18	2	3	3	3	3	3	3	3	3	3	2	3	3	3	3	3	4	3	3	3
	19	2	3	3	2	2	3	3	3	3	2	2	2	2	3	2	2	1	1	3	3
	20	1	2	2	2	2	2	3	3	2	1	2	1	2	3	2	1	2	1	3	3
	21	2	3	3	2	2	3	3	3	2	2	2	2	2	3	2	2	2	2	3	3
	22	2	3	3	2	2	3	3	3	3	2	2	2	2	3	3	2	3	2	3	3
	23	2	3	3	2	2	3	3	3	3	2	2	2	2	3	3	1	2	2	3	3
	24	1	3	2	1	2	2	3	3	2	2	1	2	1	3	2	1	2	2	3	3
	25	3	4	4	3	3	3	3	3	3	3	2	3	3	4	3	2	3	2	3	4
	26	3	3	5	4	4	3	4	3	4	3	2	3	3	3	3	2	3	2	4	3
	27	2	3	3	2	3	3	4	3	4	3	2	3	3	3	3	2	3	3	4	3
	28	4	3	4	3	4	3	4	3	4	3	2	3	3	3	3	4	4	3	4	3
	29	3	4	4	3	4	3	4	3	3	3	4	3	4	4	4	4	4	3	4	4
	30	3	4	4	3	4	3	4	3	3	3	4	3	4	4	4	3	4	3	4	4
	31	3	3	3	3	3	3	4	3	4	3	4	3	4	4	4	3	4	4	4	4
	32	4	4	4	3	4	3	4	3	3	3	4	3	4	4	4	4	4	4	4	4
	33	3	3	3	3	3	3	4	3	4	4	3	4	4	4	4	3	4	4	4	4
	34	3	3	4	3	3	3	4	3	4	4	3	4	4	4	4	3	4	4	4	4
	35	3	3	3	3	3	3	4	3	4	4	4	4	4	4	4	3	4	2	4	4
	36	3	3	3	3	3	3	4	3	4	4	4	4	4	4	4	3	4	2	4	4
	37	3	3	4	3	3	3	4	3	4	4	4	4	4	4	4	3	4	4	4	4
	38	3	3	3	3	4	3	4	3	4	4	3	4	3	4	4	3	4	4	4	4
	39	3	3	3	3	4	3	4	3	4	4	3	4	4	4	4	3	4	4	4	4
	40	3	3	4	3	4	3	4	3	4	4	4	4	4	4	4	3	4	4	4	4
	41	4	3	4	3	4	4	4	3	4	4	4	4	4	4	4	4	4	4	4	4
	42	3	3	4	3	4	3	4	3	3	2	3	2	3	4	3	4	4	4	4	4
	43	4	3	4	3	4	3	4	3	3	4	4	4	4	4	4	4	4	4	4	4
	44	4	4	4	3	4	3	4	3	3	4	4	4	4	4	4	4	4	4	4	4
	45	4	4	4	3	4	3	4	3	4	4	4	4	4	4	4	4	4	4	4	4
	46	2	3	3	3	3	3	4	3	3	3	3	3	3	4	3	3	4	4	4	4
	47	3	4	4	3	4	4	4	4	4	4	4	4	4	4	4	3	4	4	4	4
	48	4	3	4	3	4	2	3	3	3	4	4	4	4	4	4	4	4	4	3	4
	49	4	3	4	3	4	4	4	3	4	4	4	4	4	4	4	4	4	4	4	4
	50	4	3	4	3	4	4	4	3	4	4	4	4	4	4	4	4	4	4	4	4
	51	4	3	4	3	4	4	4	3	4	4	4	4	4	4	4	4	4	4	4	4
	52	4	3	4	3	4	4	4	4	3	4	4	4	4	4	4	4	4	4	4	4
	53	3	3	3	3	4	3	4	3	4	4	4	4	4	4	4	4	4	4	4	4
	54	4	3	4	3	4	4	4	3	4	4	4	4	4	4	4	4	4	4	4	4
	55	3	3	3	2	3	3	4	3	4	4	3	4	3	4	4	4	4	4	4	4
	56	4	3	4	3	4	4	4	3	4	4	4	4	4	4	4	4	4	5	4	4
	57	3	3	3	3	3	3	4	3	4	4	3	4	3	4	4	4	4	4	4	4
	58	3	4	4	3	4	3	4	3	4	4	4	4	4	4	4	2	3	3	4	4
	59	4	4	4	3	4	4	4	3	4	4	4	4	4	4	4	2	3	3	4	4
	60	3	3	3	3	3	3	4	3	4	3	2	3	3	4	4	2	3	3	4	4
	61	4	5	5	4	4	4	4	4	3	3	3	3	3	4	3	4	4	4	4	4
	62	4	4	4	3	4	4	4	4	4	4	4	4	4	4	4	4	4	4	4	4
	63	4	4	4	3	4	4	4	3	4	4	4	4	4	4	4	4	4	4	4	4
	64	4	4	4	4	4	4	4	3	4	4	4	4	4	4	4	4	4	4	4	4
	65	4	4	4	4	4	3	4	3	4	4	4	4	4	4	4	4	4	4	4	4
	66	3	3	4	3	4	4	4	3	4	4	4	4	4	4	4	3	4	5	4	4
	67	4	4	4	3	4	4	4	4	4	4	4	4	4	4	4	4	4	4	4	4
	68	4	4	5	4	4	4	4	4	4	4	4	4	4	4	4	4	4	4	4	4
	69	4	4	5	4	4	4	4	4	4	4	3	4	4	4	4	4	4	4	4	4
	70	3	4	4	4	4	4	4	4	4	4	4	4	4	4	4	4	4	4	4	4
	71	4	5	4	4	4	4	4	4	4	4	3	4	4	4	4	3	4	4	4	4
	72	4	5	5	4	4	4	4	5	5	3	3	3	4	4	4	3	4	4	4	4
	73	4	4	5	5	4	4	4	4	4	5	3	5	4	4	4	4	4	4	4	4
	74	4	4	5	5	4	4	4	4	4	4	4	4	4	4	5	4	4	4	4	4
	75	4	4	5	4	4	3	4	3	4	4	4	4	4	4	4	4	4	4	4	4
	76	4	4	5	4	4	4	4	4	4	4	4	4	4	4	4	4	4	4	4	4
	77	5	5	5	4	5	4	4	4	4	4	4	4	4	4	4	4	4	4	4	4
	78	1	3	3	1	1	2	3	3	3	2	1	2	1	2	1	1	1	1	3	2
	79	3	3	3	2	2	3	4	3	4	1	1	1	1	3	3	1	2	1	4	3
	80	2	3	3	2	2	2	3	3	2	1	1	1	2	4	3	1	2	1	3	4
	81	2	3	3	1	1	1	2	2	2	1	1	1	1	2	1	1	2	1	2	2
	82	1	3	2	1	1	2	3	3	2	2	1	2	1	2	1	1	1	1	3	2
	83	4	4	3	2	2	2	1	1	2	2	1	2	3	4	3	3	2	2	1	4
	84	3	4	3	2	2	1	2	3	3	2	1	2	3	3	2	3	4	2	2	3
	85	2	3	3	2	2	1	2	2	1	2	2	2	1	3	2	1	2	1	2	3
	86	1	2	3	2	3	1	3	2	1	2	2	2	1	3	2	1	2	1	3	3
	87	1	2	2	2	3	2	3	2	1	2	2	2	2	3	2	1	2	1	3	3
	88	2	3	4	2	3	2	1	1	1	2	2	2	2	3	2	1	1	1	1	3
	89	2	3	3	2	2	1	2	2	1	2	1	2	2	3	2	1	2	2	2	3
	90	3	4	4	3	2	3	3	3	3	2	2	2	2	3	2	3	4	2	3	3
	91	2	3	3	3	2	3	3	3	3	3	2	3	2	3	3	3	4	2	3	3
	92	2	3	3	3	3	3	4	3	4	3	2	3	2	3	3	3	4	2	4	3
	93	4	5	5	5	4	5	5	4	4	4	5	4	4	4	4	5	5	5	5	4
	94	3	3	3	3	3	3	4	3	4	4	4	4	4	4	4	4	4	4	4	4
	95	3	3	3	3	3	3	4	3	4	4	4	4	4	4	4	4	4	4	4	4
	96	4	4	4	3	4	4	4	4	4	4	4	4	4	4	4	4	4	4	4	4
	97	4	4	4	3	4	4	4	4	4	4	4	4	4	4	4	4	4	5	4	4
	98	4	4	4	3	4	3	4	3	3	4	4	4	4	4	4	4	4	4	4	4
	99	4	4	4	3	4	3	4	3	4	4	5	4	4	4	4	4	4	4	4	4
	100	4	4	4	3	4	4	4	4	4	5	5	5	4	4	4	4	4	4	4	4
	101	4	4	4	4	4	3	4	3	3	5	4	5	4	4	4	4	4	4	4	4
	102	4	4	4	4	4	4	4	4	4	5	5	5	4	4	4	4	4	4	4	4
	103	4	4	4	4	4	4	4	4	4	4	4	4	4	4	4	4	4	4	4	4
	104	3	4	4	3	4	4	5	4	4	5	5	5	4	4	4	4	4	4	5	4
	105	3	4	4	3	4	4	5	4	4	5	4	5	4	4	4	4	4	4	5	4
	106	4	5	5	4	4	4	4	4	4	4	4	4	5	4	4	4	4	5	4	4
	107	3	4	4	3	4	4	4	4	4	5	4	5	4	4	4	4	4	4	4	4
	108	4	4	4	4	4	4	4	4	4	4	4	4	4	4	4	4	4	4	4	4
	109	4	4	4	4	4	4	5	5	5	5	5	5	4	4	4	5	5	4	5	4
	110	4	4	4	4	4	3	4	3	4	4	4	4	5	4	4	5	4	3	4	4
	111	4	5	5	4	5	4	4	4	4	4	4	4	5	4	4	5	5	5	4	4
	112	3	4	4	3	4	4	5	4	4	4	4	4	2	4	4	4	4	4	5	4
	113	4	4	5	4	4	4	5	5	5	3	3	3	3	4	3	4	4	4	5	4
	114	4	4	5	4	4	4	4	3	4	4	4	4	4	4	4	4	4	4	4	4
	115	5	5	5	4	4	3	5	4	5	5	5	5	5	4	4	5	4	4	5	4
	116	4	4	5	4	4	4	4	4	4	5	4	5	4	4	4	5	4	4	4	4
	117	4	5	5	4	5	4	4	4	4	4	4	4	4	4	4	5	4	4	4	4
	118	4	5	5	4	4	4	5	5	5	5	5	5	4	5	5	5	4	4	5	5
	119	4	5	5	4	4	4	5	5	5	5	5	5	5	5	5	5	4	4	5	5
	120	5	5	5	4	4	4	5	4	5	5	5	5	5	5	5	4	4	4	5	5
	121	3	4	4	3	4	4	4	4	4	4	4	4	4	4	4	4	4	4	4	4
	122	4	4	4	5	4	3	4	3	3	5	5	5	5	4	5	3	3	4	4	4
	123	5	5	5	5	5	4	4	3	4	4	4	4	4	4	4	5	4	4	4	4
	124	3	4	5	4	4	3	4	3	4	4	4	4	5	5	5	3	3	3	4	5
	125	4	5	4	3	4	3	4	3	3	4	4	4	5	5	5	3	3	3	4	5
	126	5	5	5	4	4	4	4	4	4	4	4	4	5	5	5	5	5	5	4	5
	127	5	4	4	3	4	4	5	5	5	4	4	4	3	4	4	5	5	4	5	4
	128	4	4	4	3	4	4	5	5	5	4	4	4	4	2	4	5	5	5	5	2
	129	5	4	4	3	4	4	5	5	5	4	4	4	4	4	4	4	5	5	5	4
	130	3	4	5	4	4	4	4	5	5	5	5	5	4	4	4	5	5	4	4	4
	131	3	4	4	5	4	4	4	4	4	4	4	4	5	4	4	4	5	5	4	4
	132	4	5	5	4	4	4	5	5	5	5	4	5	4	4	4	5	5	5	5	4
	133	5	4	4	4	4	4	4	4	4	4	4	4	4	5	4	3	3	4	4	5
	134	5	4	4	4	4	4	5	5	5	5	3	5	3	4	4	5	5	5	5	4
	135	5	5	5	5	5	4	5	5	5	4	4	4	5	4	4	5	5	4	5	4
	136	4	4	4	5	5	4	5	5	5	4	4	4	4	4	4	5	5	5	5	4
	137	5	5	5	5	4	5	5	4	4	5	5	5	4	5	5	5	5	5	5	5
	138	5	5	5	5	4	5	5	4	4	5	5	5	4	4	4	4	5	4	5	4
	139	5	5	5	5	5	4	4	4	4	5	4	5	4	4	4	3	4	4	4	4
	140	5	5	5	4	5	4	4	4	4	3	4	3	4	4	4	2	3	3	4	4
	141	4	5	4	4	5	4	4	4	4	3	2	3	3	3	3	2	3	3	4	3
	142	4	4	4	4	4	5	4	4	4	4	5	4	3	4	4	4	4	4	4	4
	143	5	5	5	5	5	5	4	4	4	4	4	4	5	4	4	2	3	3	4	4
	144	5	4	5	5	5	5	4	4	4	4	4	4	4	4	4	5	4	4	4	4
	145	3	4	5	4	4	4	4	4	4	4	4	4	3	4	4	4	4	4	4	4
	146	3	4	5	4	4	4	4	4	4	4	4	4	3	4	4	4	4	4	4	4
	147	5	5	5	5	4	3	4	3	4	4	5	4	3	4	4	4	5	5	4	4
	148	4	5	5	4	4	3	4	3	4	3	4	3	3	4	4	4	4	4	4	4
	149	5	5	5	4	5	4	4	4	4	3	4	3	4	4	4	2	3	3	4	4
	150	4	5	4	4	5	4	4	4	4	3	2	3	3	3	3	2	3	3	4	3
	151	4	4	4	4	4	5	4	4	4	4	5	4	3	4	4	4	4	4	4	4
	152	5	5	5	5	5	5	4	4	4	4	4	4	5	4	4	2	3	3	4	4
	153	5	4	5	5	5	5	4	4	4	4	4	4	4	4	4	5	4	4	4	4
	154	3	4	5	4	4	4	4	4	4	4	4	4	3	4	4	4	4	4	4	4
	155	3	4	5	4	4	4	4	4	4	4	4	4	3	4	4	4	4	4	4	4
	156	5	5	5	5	4	3	4	3	4	4	5	4	3	4	4	4	5	5	4	4
	157	4	5	5	4	4	3	4	3	4	3	4	3	3	4	4	4	4	4	4	4
	158	5	4	5	4	4	4	4	4	4	3	4	3	3	4	4	5	5	4	4	4
	159	4	5	4	4	4	4	4	4	4	4	4	4	3	4	4	2	4	5	4	4
	160	3	4	3	2	2	5	5	4	5	4	4	4	4	4	4	5	5	5	5	4
	161	2	3	3	2	2	3	4	4	4	1	2	1	3	3	3	2	3	3	4	3
	162	5	5	5	4	4	3	4	3	4	4	4	4	4	4	4	4	4	4	4	4
	163	3	3	4	3	4	3	4	3	5	4	3	4	4	4	4	3	4	4	4	4
	164	3	3	3	3	3	3	4	3	4	4	3	4	4	4	4	4	4	4	4	4
	165	3	4	4	3	4	3	3	3	3	3	4	3	4	4	3	3	4	2	3	4
	166	3	4	4	3	4	3	4	3	3	3	3	3	3	4	3	3	4	3	4	4
	167	2	3	3	3	3	3	3	3	3	3	2	3	3	3	3	3	4	3	3	3
	168	5	4	5	5	5	5	4	4	4	4	4	4	4	4	4	5	4	4	4	4
	169	3	4	5	4	4	4	4	4	4	4	4	4	3	4	4	4	4	4	4	4
	170	3	4	5	4	4	4	4	4	4	4	4	4	3	4	4	4	4	4	4	4
	171	5	5	5	5	4	3	4	3	4	4	5	4	3	4	4	4	5	5	4	4
	172	4	5	5	4	4	3	4	3	4	3	4	3	3	4	4	4	4	4	4	4
	173	5	5	5	4	5	4	4	4	4	3	4	3	4	4	4	2	3	3	4	4
	174	4	5	4	4	5	4	4	4	4	3	2	3	3	3	3	2	3	3	4	3
	175	4	4	4	4	4	5	4	4	4	4	5	4	3	4	4	4	4	4	4	4
	176	5	5	5	5	5	5	4	4	4	4	4	4	5	4	4	2	3	3	4	4
	177	5	4	5	5	5	5	4	4	4	4	4	4	4	4	4	5	4	4	4	4
	178	3	4	5	4	4	4	4	4	4	4	4	4	3	4	4	4	4	4	4	4
	179	3	4	5	4	4	4	4	4	4	4	4	4	3	4	4	4	4	4	4	4
	180	5	5	5	5	4	3	4	3	4	4	5	4	3	4	4	4	5	5	4	4
	181	5	5	5	4	4	3	4	3	4	4	4	4	4	4	4	4	4	4	4	4
	182	3	3	4	3	4	3	4	3	5	4	3	4	4	4	4	3	4	4	4	4
	183	3	3	3	3	3	3	4	3	4	4	3	4	4	4	4	4	4	4	4	4
	184	3	4	4	3	4	3	3	3	3	3	4	3	4	4	3	3	4	2	3	4
	185	3	4	4	3	4	3	4	3	3	3	3	3	3	4	3	3	4	3	4	4
	186	2	3	3	3	3	3	3	3	3	3	2	3	3	3	3	3	4	3	3	3
	187	5	4	5	5	5	5	4	4	4	4	4	4	4	4	4	5	4	4	4	4
	188	3	4	5	4	4	4	4	4	4	4	4	4	3	4	4	4	4	4	4	4
	189	3	4	5	4	4	4	4	4	4	4	4	4	3	4	4	4	4	4	4	4
	190	5	5	5	5	4	3	4	3	4	4	5	4	3	4	4	4	5	5	4	4
	191	4	5	5	4	4	3	4	3	4	3	4	3	3	4	4	4	4	4	4	4
	192	5	5	5	4	5	4	4	4	4	3	4	3	4	4	4	2	3	3	4	4
	193	4	5	4	4	5	4	4	4	4	3	2	3	3	3	3	2	3	3	4	3
	194	4	4	4	4	4	5	4	4	4	4	5	4	3	4	4	4	4	4	4	4
	195	5	5	5	5	4	3	4	3	4	4	5	4	3	4	4	4	5	5	4	4
	196	4	5	5	4	4	3	4	3	4	3	4	3	3	4	4	4	4	4	4	4
	197	5	5	5	4	5	4	4	4	4	3	4	3	4	4	4	2	3	3	4	4
	198	4	5	4	4	5	4	4	4	4	3	2	3	3	3	3	2	3	3	4	3
	199	4	4	4	4	4	5	4	4	4	4	5	4	3	4	4	4	4	4	4	4
	MV descriptives
		Mean	Median	Observed min	Observed max	Standard deviation	Excess kurtosis	Skewness	Number of observations used	Cramér-von Mises test statistic	Cramér-von Mises p value
	CW1	3.63	4	1	5	1.00155	-0.143515	-0.46726	200	1.58501	7.37e-10
	CW2	3.96	4	2	5	0.78	-0.898584	-0.12087	200	2.29235	7.37e-10
	CW3	4.145	4	2	5	0.796225	-0.591849	-0.506649	200	2.40296	7.37e-10
	CW4	3.525	4	1	5	0.921615	-0.11331	-0.305656	200	1.85329	7.37e-10
	CW5	3.8	4	1	5	0.848528	1.34092	-1.08848	200	4.65155	7.37e-10
	EE1	3.545	4	1	5	0.835449	0.8043	-0.480471	200	2.4502	7.37e-10
	EE2	3.93	4	1	5	0.612454	5.92389	-1.53894	200	7.50787	7.37e-10
	EE3	3.51	3	1	5	0.699929	0.816309	-0.123996	200	3.32892	7.37e-10
	EE4	3.8	4	1	5	0.761577	3.5874	-1.49181	200	5.73993	7.37e-10
	EE5	3.63	4	1	5	0.879261	1.06793	-0.980076	200	3.59157	7.37e-10
	HC1	3.6	4	1	5	1.02956	0.168969	-0.908474	200	3.66117	7.37e-10
	HC2	3.63	4	1	5	0.879261	1.06793	-0.980076	200	3.59157	7.37e-10
	HC3	3.52	4	1	5	0.865794	0.955145	-0.807276	200	2.76999	7.37e-10
	HC4	3.85	4	2	5	0.497494	3.36468	-1.27041	200	8.80667	7.37e-10
	HC5	3.73	4	1	5	0.697925	3.40348	-1.61754	200	6.92866	7.37e-10
	IS1	3.475	4	1	5	1.10425	-0.318831	-0.665815	200	2.24859	7.37e-10
	IS2	3.805	4	1	5	0.81054	2.1857	-1.21713	200	4.87452	7.37e-10
	IS3	3.62	4	1	5	0.992774	0.825567	-1.06222	200	3.60439	7.37e-10
	IS4	3.93	4	1	5	0.612454	5.92389	-1.53894	200	7.50787	7.37e-10
	IS5	3.85	4	2	5	0.497494	3.36468	-1.27041	200	8.80667	7.37e-10
	Indicator data (standardized)
	Matrix
	Case index	CW1	CW2	CW3	CW4	CW5	EE1	EE2	EE3	EE4	EE5	HC1	HC2	HC3	HC4	HC5	IS1	IS2	IS3	IS4	IS5
	0	1.36788	1.33333	1.07382	0.515399	1.41421	0.544617	0.114294	0.700071	0.262613	-0.716511	0.388514	-0.716511	0.554404	0.301511	0.386861	-1.33574	-0.993165	-0.624513	0.114294	0.301511
	1	0.369428	1.33333	-0.182109	0.515399	1.41421	0.544617	0.114294	0.700071	0.262613	-0.716511	-1.55406	-0.716511	-0.600604	-1.70856	-1.04596	-1.33574	-0.993165	-0.624513	0.114294	-1.70856
	2	0.369428	0.0512821	-0.182109	0.515399	0.235702	1.74158	0.114294	0.700071	0.262613	0.420808	1.3598	0.420808	-0.600604	0.301511	0.386861	0.475434	0.24058	0.382766	0.114294	0.301511
	3	1.36788	1.33333	1.07382	1.60045	1.41421	1.74158	0.114294	0.700071	0.262613	0.420808	0.388514	0.420808	1.70941	0.301511	0.386861	-1.33574	-0.993165	-0.624513	0.114294	0.301511
	4	1.36788	0.0512821	1.07382	1.60045	1.41421	1.74158	0.114294	0.700071	0.262613	0.420808	0.388514	0.420808	0.554404	0.301511	0.386861	1.38102	0.24058	0.382766	0.114294	0.301511
	5	-0.629026	0.0512821	1.07382	0.515399	0.235702	0.544617	0.114294	0.700071	0.262613	0.420808	0.388514	0.420808	-0.600604	0.301511	0.386861	0.475434	0.24058	0.382766	0.114294	0.301511
	6	-0.629026	0.0512821	1.07382	0.515399	0.235702	0.544617	0.114294	0.700071	0.262613	0.420808	0.388514	0.420808	-0.600604	0.301511	0.386861	0.475434	0.24058	0.382766	0.114294	0.301511
	7	1.36788	1.33333	1.07382	1.60045	0.235702	-0.652344	0.114294	-0.728646	0.262613	0.420808	1.3598	0.420808	-0.600604	0.301511	0.386861	0.475434	1.47433	1.39004	0.114294	0.301511
	8	0.369428	1.33333	1.07382	0.515399	0.235702	-0.652344	0.114294	-0.728646	0.262613	-0.716511	0.388514	-0.716511	-0.600604	0.301511	0.386861	0.475434	0.24058	0.382766	0.114294	0.301511
	9	1.36788	0.0512821	1.07382	0.515399	0.235702	0.544617	0.114294	0.700071	0.262613	-0.716511	0.388514	-0.716511	-0.600604	0.301511	0.386861	1.38102	1.47433	0.382766	0.114294	0.301511
	10	0.369428	1.33333	-0.182109	0.515399	0.235702	0.544617	0.114294	0.700071	0.262613	0.420808	0.388514	0.420808	-0.600604	0.301511	0.386861	-1.33574	0.24058	1.39004	0.114294	0.301511
	11	-0.629026	0.0512821	-1.43803	-1.6547	-2.12132	1.74158	1.74707	0.700071	1.57568	0.420808	0.388514	0.420808	0.554404	0.301511	0.386861	1.38102	1.47433	1.39004	1.74707	0.301511
	12	-1.62748	-1.23077	-1.43803	-1.6547	-2.12132	-0.652344	0.114294	0.700071	0.262613	-2.99115	-1.55406	-2.99115	-0.600604	-1.70856	-1.04596	-1.33574	-0.993165	-0.624513	0.114294	-1.70856
	13	1.36788	1.33333	1.07382	0.515399	0.235702	-0.652344	0.114294	-0.728646	0.262613	0.420808	0.388514	0.420808	0.554404	0.301511	0.386861	0.475434	0.24058	0.382766	0.114294	0.301511
	14	-0.629026	-1.23077	-0.182109	-0.569652	0.235702	-0.652344	0.114294	-0.728646	1.57568	0.420808	-0.582772	0.420808	0.554404	0.301511	0.386861	-0.430155	0.24058	0.382766	0.114294	0.301511
	15	-0.629026	-1.23077	-1.43803	-0.569652	-0.942809	-0.652344	0.114294	-0.728646	0.262613	0.420808	-0.582772	0.420808	0.554404	0.301511	0.386861	0.475434	0.24058	0.382766	0.114294	0.301511
	16	-0.629026	0.0512821	-0.182109	-0.569652	0.235702	-0.652344	-1.51848	-0.728646	-1.05045	-0.716511	0.388514	-0.716511	0.554404	0.301511	-1.04596	-0.430155	0.24058	-1.63179	-1.51848	0.301511
	17	-0.629026	0.0512821	-0.182109	-0.569652	0.235702	-0.652344	0.114294	-0.728646	-1.05045	-0.716511	-0.582772	-0.716511	-0.600604	0.301511	-1.04596	-0.430155	0.24058	-0.624513	0.114294	0.301511
	18	-1.62748	-1.23077	-1.43803	-0.569652	-0.942809	-0.652344	-1.51848	-0.728646	-1.05045	-0.716511	-1.55406	-0.716511	-0.600604	-1.70856	-1.04596	-0.430155	0.24058	-0.624513	-1.51848	-1.70856
	19	-1.62748	-1.23077	-1.43803	-1.6547	-2.12132	-0.652344	-1.51848	-0.728646	-1.05045	-1.85383	-1.55406	-1.85383	-1.75561	-1.70856	-2.47877	-1.33574	-3.46066	-2.63907	-1.51848	-1.70856
	20	-2.62593	-2.51282	-2.69396	-1.6547	-2.12132	-1.84931	-1.51848	-0.728646	-2.36352	-2.99115	-1.55406	-2.99115	-1.75561	-1.70856	-2.47877	-2.24133	-2.22691	-2.63907	-1.51848	-1.70856
	21	-1.62748	-1.23077	-1.43803	-1.6547	-2.12132	-0.652344	-1.51848	-0.728646	-2.36352	-1.85383	-1.55406	-1.85383	-1.75561	-1.70856	-2.47877	-1.33574	-2.22691	-1.63179	-1.51848	-1.70856
	22	-1.62748	-1.23077	-1.43803	-1.6547	-2.12132	-0.652344	-1.51848	-0.728646	-1.05045	-1.85383	-1.55406	-1.85383	-1.75561	-1.70856	-1.04596	-1.33574	-0.993165	-1.63179	-1.51848	-1.70856
	23	-1.62748	-1.23077	-1.43803	-1.6547	-2.12132	-0.652344	-1.51848	-0.728646	-1.05045	-1.85383	-1.55406	-1.85383	-1.75561	-1.70856	-1.04596	-2.24133	-2.22691	-1.63179	-1.51848	-1.70856
	24	-2.62593	-1.23077	-2.69396	-2.73975	-2.12132	-1.84931	-1.51848	-0.728646	-2.36352	-1.85383	-2.52534	-1.85383	-2.91062	-1.70856	-2.47877	-2.24133	-2.22691	-1.63179	-1.51848	-1.70856
	25	-0.629026	0.0512821	-0.182109	-0.569652	-0.942809	-0.652344	-1.51848	-0.728646	-1.05045	-0.716511	-1.55406	-0.716511	-0.600604	0.301511	-1.04596	-1.33574	-0.993165	-1.63179	-1.51848	0.301511
	26	-0.629026	-1.23077	1.07382	0.515399	0.235702	-0.652344	0.114294	-0.728646	0.262613	-0.716511	-1.55406	-0.716511	-0.600604	-1.70856	-1.04596	-1.33574	-0.993165	-1.63179	0.114294	-1.70856
	27	-1.62748	-1.23077	-1.43803	-1.6547	-0.942809	-0.652344	0.114294	-0.728646	0.262613	-0.716511	-1.55406	-0.716511	-0.600604	-1.70856	-1.04596	-1.33574	-0.993165	-0.624513	0.114294	-1.70856
	28	0.369428	-1.23077	-0.182109	-0.569652	0.235702	-0.652344	0.114294	-0.728646	0.262613	-0.716511	-1.55406	-0.716511	-0.600604	-1.70856	-1.04596	0.475434	0.24058	-0.624513	0.114294	-1.70856
	29	-0.629026	0.0512821	-0.182109	-0.569652	0.235702	-0.652344	0.114294	-0.728646	-1.05045	-0.716511	0.388514	-0.716511	0.554404	0.301511	0.386861	0.475434	0.24058	-0.624513	0.114294	0.301511
	30	-0.629026	0.0512821	-0.182109	-0.569652	0.235702	-0.652344	0.114294	-0.728646	-1.05045	-0.716511	0.388514	-0.716511	0.554404	0.301511	0.386861	-0.430155	0.24058	-0.624513	0.114294	0.301511
	31	-0.629026	-1.23077	-1.43803	-0.569652	-0.942809	-0.652344	0.114294	-0.728646	0.262613	-0.716511	0.388514	-0.716511	0.554404	0.301511	0.386861	-0.430155	0.24058	0.382766	0.114294	0.301511
	32	0.369428	0.0512821	-0.182109	-0.569652	0.235702	-0.652344	0.114294	-0.728646	-1.05045	-0.716511	0.388514	-0.716511	0.554404	0.301511	0.386861	0.475434	0.24058	0.382766	0.114294	0.301511
	33	-0.629026	-1.23077	-1.43803	-0.569652	-0.942809	-0.652344	0.114294	-0.728646	0.262613	0.420808	-0.582772	0.420808	0.554404	0.301511	0.386861	-0.430155	0.24058	0.382766	0.114294	0.301511
	34	-0.629026	-1.23077	-0.182109	-0.569652	-0.942809	-0.652344	0.114294	-0.728646	0.262613	0.420808	-0.582772	0.420808	0.554404	0.301511	0.386861	-0.430155	0.24058	0.382766	0.114294	0.301511
	35	-0.629026	-1.23077	-1.43803	-0.569652	-0.942809	-0.652344	0.114294	-0.728646	0.262613	0.420808	0.388514	0.420808	0.554404	0.301511	0.386861	-0.430155	0.24058	-1.63179	0.114294	0.301511
	36	-0.629026	-1.23077	-1.43803	-0.569652	-0.942809	-0.652344	0.114294	-0.728646	0.262613	0.420808	0.388514	0.420808	0.554404	0.301511	0.386861	-0.430155	0.24058	-1.63179	0.114294	0.301511
	37	-0.629026	-1.23077	-0.182109	-0.569652	-0.942809	-0.652344	0.114294	-0.728646	0.262613	0.420808	0.388514	0.420808	0.554404	0.301511	0.386861	-0.430155	0.24058	0.382766	0.114294	0.301511
	38	-0.629026	-1.23077	-1.43803	-0.569652	0.235702	-0.652344	0.114294	-0.728646	0.262613	0.420808	-0.582772	0.420808	-0.600604	0.301511	0.386861	-0.430155	0.24058	0.382766	0.114294	0.301511
	39	-0.629026	-1.23077	-1.43803	-0.569652	0.235702	-0.652344	0.114294	-0.728646	0.262613	0.420808	-0.582772	0.420808	0.554404	0.301511	0.386861	-0.430155	0.24058	0.382766	0.114294	0.301511
	40	-0.629026	-1.23077	-0.182109	-0.569652	0.235702	-0.652344	0.114294	-0.728646	0.262613	0.420808	0.388514	0.420808	0.554404	0.301511	0.386861	-0.430155	0.24058	0.382766	0.114294	0.301511
	41	0.369428	-1.23077	-0.182109	-0.569652	0.235702	0.544617	0.114294	-0.728646	0.262613	0.420808	0.388514	0.420808	0.554404	0.301511	0.386861	0.475434	0.24058	0.382766	0.114294	0.301511
	42	-0.629026	-1.23077	-0.182109	-0.569652	0.235702	-0.652344	0.114294	-0.728646	-1.05045	-1.85383	-0.582772	-1.85383	-0.600604	0.301511	-1.04596	0.475434	0.24058	0.382766	0.114294	0.301511
	43	0.369428	-1.23077	-0.182109	-0.569652	0.235702	-0.652344	0.114294	-0.728646	-1.05045	0.420808	0.388514	0.420808	0.554404	0.301511	0.386861	0.475434	0.24058	0.382766	0.114294	0.301511
	44	0.369428	0.0512821	-0.182109	-0.569652	0.235702	-0.652344	0.114294	-0.728646	-1.05045	0.420808	0.388514	0.420808	0.554404	0.301511	0.386861	0.475434	0.24058	0.382766	0.114294	0.301511
	45	0.369428	0.0512821	-0.182109	-0.569652	0.235702	-0.652344	0.114294	-0.728646	0.262613	0.420808	0.388514	0.420808	0.554404	0.301511	0.386861	0.475434	0.24058	0.382766	0.114294	0.301511
	46	-1.62748	-1.23077	-1.43803	-0.569652	-0.942809	-0.652344	0.114294	-0.728646	-1.05045	-0.716511	-0.582772	-0.716511	-0.600604	0.301511	-1.04596	-0.430155	0.24058	0.382766	0.114294	0.301511
	47	-0.629026	0.0512821	-0.182109	-0.569652	0.235702	0.544617	0.114294	0.700071	0.262613	0.420808	0.388514	0.420808	0.554404	0.301511	0.386861	-0.430155	0.24058	0.382766	0.114294	0.301511
	48	0.369428	-1.23077	-0.182109	-0.569652	0.235702	-1.84931	-1.51848	-0.728646	-1.05045	0.420808	0.388514	0.420808	0.554404	0.301511	0.386861	0.475434	0.24058	0.382766	-1.51848	0.301511
	49	0.369428	-1.23077	-0.182109	-0.569652	0.235702	0.544617	0.114294	-0.728646	0.262613	0.420808	0.388514	0.420808	0.554404	0.301511	0.386861	0.475434	0.24058	0.382766	0.114294	0.301511
	50	0.369428	-1.23077	-0.182109	-0.569652	0.235702	0.544617	0.114294	-0.728646	0.262613	0.420808	0.388514	0.420808	0.554404	0.301511	0.386861	0.475434	0.24058	0.382766	0.114294	0.301511
	51	0.369428	-1.23077	-0.182109	-0.569652	0.235702	0.544617	0.114294	-0.728646	0.262613	0.420808	0.388514	0.420808	0.554404	0.301511	0.386861	0.475434	0.24058	0.382766	0.114294	0.301511
	52	0.369428	-1.23077	-0.182109	-0.569652	0.235702	0.544617	0.114294	0.700071	-1.05045	0.420808	0.388514	0.420808	0.554404	0.301511	0.386861	0.475434	0.24058	0.382766	0.114294	0.301511
	53	-0.629026	-1.23077	-1.43803	-0.569652	0.235702	-0.652344	0.114294	-0.728646	0.262613	0.420808	0.388514	0.420808	0.554404	0.301511	0.386861	0.475434	0.24058	0.382766	0.114294	0.301511
	54	0.369428	-1.23077	-0.182109	-0.569652	0.235702	0.544617	0.114294	-0.728646	0.262613	0.420808	0.388514	0.420808	0.554404	0.301511	0.386861	0.475434	0.24058	0.382766	0.114294	0.301511
	55	-0.629026	-1.23077	-1.43803	-1.6547	-0.942809	-0.652344	0.114294	-0.728646	0.262613	0.420808	-0.582772	0.420808	-0.600604	0.301511	0.386861	0.475434	0.24058	0.382766	0.114294	0.301511
	56	0.369428	-1.23077	-0.182109	-0.569652	0.235702	0.544617	0.114294	-0.728646	0.262613	0.420808	0.388514	0.420808	0.554404	0.301511	0.386861	0.475434	0.24058	1.39004	0.114294	0.301511
	57	-0.629026	-1.23077	-1.43803	-0.569652	-0.942809	-0.652344	0.114294	-0.728646	0.262613	0.420808	-0.582772	0.420808	-0.600604	0.301511	0.386861	0.475434	0.24058	0.382766	0.114294	0.301511
	58	-0.629026	0.0512821	-0.182109	-0.569652	0.235702	-0.652344	0.114294	-0.728646	0.262613	0.420808	0.388514	0.420808	0.554404	0.301511	0.386861	-1.33574	-0.993165	-0.624513	0.114294	0.301511
	59	0.369428	0.0512821	-0.182109	-0.569652	0.235702	0.544617	0.114294	-0.728646	0.262613	0.420808	0.388514	0.420808	0.554404	0.301511	0.386861	-1.33574	-0.993165	-0.624513	0.114294	0.301511
	60	-0.629026	-1.23077	-1.43803	-0.569652	-0.942809	-0.652344	0.114294	-0.728646	0.262613	-0.716511	-1.55406	-0.716511	-0.600604	0.301511	0.386861	-1.33574	-0.993165	-0.624513	0.114294	0.301511
	61	0.369428	1.33333	1.07382	0.515399	0.235702	0.544617	0.114294	0.700071	-1.05045	-0.716511	-0.582772	-0.716511	-0.600604	0.301511	-1.04596	0.475434	0.24058	0.382766	0.114294	0.301511
	62	0.369428	0.0512821	-0.182109	-0.569652	0.235702	0.544617	0.114294	0.700071	0.262613	0.420808	0.388514	0.420808	0.554404	0.301511	0.386861	0.475434	0.24058	0.382766	0.114294	0.301511
	63	0.369428	0.0512821	-0.182109	-0.569652	0.235702	0.544617	0.114294	-0.728646	0.262613	0.420808	0.388514	0.420808	0.554404	0.301511	0.386861	0.475434	0.24058	0.382766	0.114294	0.301511
	64	0.369428	0.0512821	-0.182109	0.515399	0.235702	0.544617	0.114294	-0.728646	0.262613	0.420808	0.388514	0.420808	0.554404	0.301511	0.386861	0.475434	0.24058	0.382766	0.114294	0.301511
	65	0.369428	0.0512821	-0.182109	0.515399	0.235702	-0.652344	0.114294	-0.728646	0.262613	0.420808	0.388514	0.420808	0.554404	0.301511	0.386861	0.475434	0.24058	0.382766	0.114294	0.301511
	66	-0.629026	-1.23077	-0.182109	-0.569652	0.235702	0.544617	0.114294	-0.728646	0.262613	0.420808	0.388514	0.420808	0.554404	0.301511	0.386861	-0.430155	0.24058	1.39004	0.114294	0.301511
	67	0.369428	0.0512821	-0.182109	-0.569652	0.235702	0.544617	0.114294	0.700071	0.262613	0.420808	0.388514	0.420808	0.554404	0.301511	0.386861	0.475434	0.24058	0.382766	0.114294	0.301511
	68	0.369428	0.0512821	1.07382	0.515399	0.235702	0.544617	0.114294	0.700071	0.262613	0.420808	0.388514	0.420808	0.554404	0.301511	0.386861	0.475434	0.24058	0.382766	0.114294	0.301511
	69	0.369428	0.0512821	1.07382	0.515399	0.235702	0.544617	0.114294	0.700071	0.262613	0.420808	-0.582772	0.420808	0.554404	0.301511	0.386861	0.475434	0.24058	0.382766	0.114294	0.301511
	70	-0.629026	0.0512821	-0.182109	0.515399	0.235702	0.544617	0.114294	0.700071	0.262613	0.420808	0.388514	0.420808	0.554404	0.301511	0.386861	0.475434	0.24058	0.382766	0.114294	0.301511
	71	0.369428	1.33333	-0.182109	0.515399	0.235702	0.544617	0.114294	0.700071	0.262613	0.420808	-0.582772	0.420808	0.554404	0.301511	0.386861	-0.430155	0.24058	0.382766	0.114294	0.301511
	72	0.369428	1.33333	1.07382	0.515399	0.235702	0.544617	0.114294	2.12879	1.57568	-0.716511	-0.582772	-0.716511	0.554404	0.301511	0.386861	-0.430155	0.24058	0.382766	0.114294	0.301511
	73	0.369428	0.0512821	1.07382	1.60045	0.235702	0.544617	0.114294	0.700071	0.262613	1.55813	-0.582772	1.55813	0.554404	0.301511	0.386861	0.475434	0.24058	0.382766	0.114294	0.301511
	74	0.369428	0.0512821	1.07382	1.60045	0.235702	0.544617	0.114294	0.700071	0.262613	0.420808	0.388514	0.420808	0.554404	0.301511	1.81968	0.475434	0.24058	0.382766	0.114294	0.301511
	75	0.369428	0.0512821	1.07382	0.515399	0.235702	-0.652344	0.114294	-0.728646	0.262613	0.420808	0.388514	0.420808	0.554404	0.301511	0.386861	0.475434	0.24058	0.382766	0.114294	0.301511
	76	0.369428	0.0512821	1.07382	0.515399	0.235702	0.544617	0.114294	0.700071	0.262613	0.420808	0.388514	0.420808	0.554404	0.301511	0.386861	0.475434	0.24058	0.382766	0.114294	0.301511
	77	1.36788	1.33333	1.07382	0.515399	1.41421	0.544617	0.114294	0.700071	0.262613	0.420808	0.388514	0.420808	0.554404	0.301511	0.386861	0.475434	0.24058	0.382766	0.114294	0.301511
	78	-2.62593	-1.23077	-1.43803	-2.73975	-3.29983	-1.84931	-1.51848	-0.728646	-1.05045	-1.85383	-2.52534	-1.85383	-2.91062	-3.71864	-3.91159	-2.24133	-3.46066	-2.63907	-1.51848	-3.71864
	79	-0.629026	-1.23077	-1.43803	-1.6547	-2.12132	-0.652344	0.114294	-0.728646	0.262613	-2.99115	-2.52534	-2.99115	-2.91062	-1.70856	-1.04596	-2.24133	-2.22691	-2.63907	0.114294	-1.70856
	80	-1.62748	-1.23077	-1.43803	-1.6547	-2.12132	-1.84931	-1.51848	-0.728646	-2.36352	-2.99115	-2.52534	-2.99115	-1.75561	0.301511	-1.04596	-2.24133	-2.22691	-2.63907	-1.51848	0.301511
	81	-1.62748	-1.23077	-1.43803	-2.73975	-3.29983	-3.04627	-3.15126	-2.15736	-2.36352	-2.99115	-2.52534	-2.99115	-2.91062	-3.71864	-3.91159	-2.24133	-2.22691	-2.63907	-3.15126	-3.71864
	82	-2.62593	-1.23077	-2.69396	-2.73975	-3.29983	-1.84931	-1.51848	-0.728646	-2.36352	-1.85383	-2.52534	-1.85383	-2.91062	-3.71864	-3.91159	-2.24133	-3.46066	-2.63907	-1.51848	-3.71864
	83	0.369428	0.0512821	-1.43803	-1.6547	-2.12132	-1.84931	-4.78403	-3.58608	-2.36352	-1.85383	-2.52534	-1.85383	-0.600604	0.301511	-1.04596	-0.430155	-2.22691	-1.63179	-4.78403	0.301511
	84	-0.629026	0.0512821	-1.43803	-1.6547	-2.12132	-3.04627	-3.15126	-0.728646	-1.05045	-1.85383	-2.52534	-1.85383	-0.600604	-1.70856	-2.47877	-0.430155	0.24058	-1.63179	-3.15126	-1.70856
	85	-1.62748	-1.23077	-1.43803	-1.6547	-2.12132	-3.04627	-3.15126	-2.15736	-3.67658	-1.85383	-1.55406	-1.85383	-2.91062	-1.70856	-2.47877	-2.24133	-2.22691	-2.63907	-3.15126	-1.70856
	86	-2.62593	-2.51282	-1.43803	-1.6547	-0.942809	-3.04627	-1.51848	-2.15736	-3.67658	-1.85383	-1.55406	-1.85383	-2.91062	-1.70856	-2.47877	-2.24133	-2.22691	-2.63907	-1.51848	-1.70856
	87	-2.62593	-2.51282	-2.69396	-1.6547	-0.942809	-1.84931	-1.51848	-2.15736	-3.67658	-1.85383	-1.55406	-1.85383	-1.75561	-1.70856	-2.47877	-2.24133	-2.22691	-2.63907	-1.51848	-1.70856
	88	-1.62748	-1.23077	-0.182109	-1.6547	-0.942809	-1.84931	-4.78403	-3.58608	-3.67658	-1.85383	-1.55406	-1.85383	-1.75561	-1.70856	-2.47877	-2.24133	-3.46066	-2.63907	-4.78403	-1.70856
	89	-1.62748	-1.23077	-1.43803	-1.6547	-2.12132	-3.04627	-3.15126	-2.15736	-3.67658	-1.85383	-2.52534	-1.85383	-1.75561	-1.70856	-2.47877	-2.24133	-2.22691	-1.63179	-3.15126	-1.70856
	90	-0.629026	0.0512821	-0.182109	-0.569652	-2.12132	-0.652344	-1.51848	-0.728646	-1.05045	-1.85383	-1.55406	-1.85383	-1.75561	-1.70856	-2.47877	-0.430155	0.24058	-1.63179	-1.51848	-1.70856
	91	-1.62748	-1.23077	-1.43803	-0.569652	-2.12132	-0.652344	-1.51848	-0.728646	-1.05045	-0.716511	-1.55406	-0.716511	-1.75561	-1.70856	-1.04596	-0.430155	0.24058	-1.63179	-1.51848	-1.70856
	92	-1.62748	-1.23077	-1.43803	-0.569652	-0.942809	-0.652344	0.114294	-0.728646	0.262613	-0.716511	-1.55406	-0.716511	-1.75561	-1.70856	-1.04596	-0.430155	0.24058	-1.63179	0.114294	-1.70856
	93	0.369428	1.33333	1.07382	1.60045	0.235702	1.74158	1.74707	0.700071	0.262613	0.420808	1.3598	0.420808	0.554404	0.301511	0.386861	1.38102	1.47433	1.39004	1.74707	0.301511
	94	-0.629026	-1.23077	-1.43803	-0.569652	-0.942809	-0.652344	0.114294	-0.728646	0.262613	0.420808	0.388514	0.420808	0.554404	0.301511	0.386861	0.475434	0.24058	0.382766	0.114294	0.301511
	95	-0.629026	-1.23077	-1.43803	-0.569652	-0.942809	-0.652344	0.114294	-0.728646	0.262613	0.420808	0.388514	0.420808	0.554404	0.301511	0.386861	0.475434	0.24058	0.382766	0.114294	0.301511
	96	0.369428	0.0512821	-0.182109	-0.569652	0.235702	0.544617	0.114294	0.700071	0.262613	0.420808	0.388514	0.420808	0.554404	0.301511	0.386861	0.475434	0.24058	0.382766	0.114294	0.301511
	97	0.369428	0.0512821	-0.182109	-0.569652	0.235702	0.544617	0.114294	0.700071	0.262613	0.420808	0.388514	0.420808	0.554404	0.301511	0.386861	0.475434	0.24058	1.39004	0.114294	0.301511
	98	0.369428	0.0512821	-0.182109	-0.569652	0.235702	-0.652344	0.114294	-0.728646	-1.05045	0.420808	0.388514	0.420808	0.554404	0.301511	0.386861	0.475434	0.24058	0.382766	0.114294	0.301511
	99	0.369428	0.0512821	-0.182109	-0.569652	0.235702	-0.652344	0.114294	-0.728646	0.262613	0.420808	1.3598	0.420808	0.554404	0.301511	0.386861	0.475434	0.24058	0.382766	0.114294	0.301511
	100	0.369428	0.0512821	-0.182109	-0.569652	0.235702	0.544617	0.114294	0.700071	0.262613	1.55813	1.3598	1.55813	0.554404	0.301511	0.386861	0.475434	0.24058	0.382766	0.114294	0.301511
	101	0.369428	0.0512821	-0.182109	0.515399	0.235702	-0.652344	0.114294	-0.728646	-1.05045	1.55813	0.388514	1.55813	0.554404	0.301511	0.386861	0.475434	0.24058	0.382766	0.114294	0.301511
	102	0.369428	0.0512821	-0.182109	0.515399	0.235702	0.544617	0.114294	0.700071	0.262613	1.55813	1.3598	1.55813	0.554404	0.301511	0.386861	0.475434	0.24058	0.382766	0.114294	0.301511
	103	0.369428	0.0512821	-0.182109	0.515399	0.235702	0.544617	0.114294	0.700071	0.262613	0.420808	0.388514	0.420808	0.554404	0.301511	0.386861	0.475434	0.24058	0.382766	0.114294	0.301511
	104	-0.629026	0.0512821	-0.182109	-0.569652	0.235702	0.544617	1.74707	0.700071	0.262613	1.55813	1.3598	1.55813	0.554404	0.301511	0.386861	0.475434	0.24058	0.382766	1.74707	0.301511
	105	-0.629026	0.0512821	-0.182109	-0.569652	0.235702	0.544617	1.74707	0.700071	0.262613	1.55813	0.388514	1.55813	0.554404	0.301511	0.386861	0.475434	0.24058	0.382766	1.74707	0.301511
	106	0.369428	1.33333	1.07382	0.515399	0.235702	0.544617	0.114294	0.700071	0.262613	0.420808	0.388514	0.420808	1.70941	0.301511	0.386861	0.475434	0.24058	1.39004	0.114294	0.301511
	107	-0.629026	0.0512821	-0.182109	-0.569652	0.235702	0.544617	0.114294	0.700071	0.262613	1.55813	0.388514	1.55813	0.554404	0.301511	0.386861	0.475434	0.24058	0.382766	0.114294	0.301511
	108	0.369428	0.0512821	-0.182109	0.515399	0.235702	0.544617	0.114294	0.700071	0.262613	0.420808	0.388514	0.420808	0.554404	0.301511	0.386861	0.475434	0.24058	0.382766	0.114294	0.301511
	109	0.369428	0.0512821	-0.182109	0.515399	0.235702	0.544617	1.74707	2.12879	1.57568	1.55813	1.3598	1.55813	0.554404	0.301511	0.386861	1.38102	1.47433	0.382766	1.74707	0.301511
	110	0.369428	0.0512821	-0.182109	0.515399	0.235702	-0.652344	0.114294	-0.728646	0.262613	0.420808	0.388514	0.420808	1.70941	0.301511	0.386861	1.38102	0.24058	-0.624513	0.114294	0.301511
	111	0.369428	1.33333	1.07382	0.515399	1.41421	0.544617	0.114294	0.700071	0.262613	0.420808	0.388514	0.420808	1.70941	0.301511	0.386861	1.38102	1.47433	1.39004	0.114294	0.301511
	112	-0.629026	0.0512821	-0.182109	-0.569652	0.235702	0.544617	1.74707	0.700071	0.262613	0.420808	0.388514	0.420808	-1.75561	0.301511	0.386861	0.475434	0.24058	0.382766	1.74707	0.301511
	113	0.369428	0.0512821	1.07382	0.515399	0.235702	0.544617	1.74707	2.12879	1.57568	-0.716511	-0.582772	-0.716511	-0.600604	0.301511	-1.04596	0.475434	0.24058	0.382766	1.74707	0.301511
	114	0.369428	0.0512821	1.07382	0.515399	0.235702	0.544617	0.114294	-0.728646	0.262613	0.420808	0.388514	0.420808	0.554404	0.301511	0.386861	0.475434	0.24058	0.382766	0.114294	0.301511
	115	1.36788	1.33333	1.07382	0.515399	0.235702	-0.652344	1.74707	0.700071	1.57568	1.55813	1.3598	1.55813	1.70941	0.301511	0.386861	1.38102	0.24058	0.382766	1.74707	0.301511
	116	0.369428	0.0512821	1.07382	0.515399	0.235702	0.544617	0.114294	0.700071	0.262613	1.55813	0.388514	1.55813	0.554404	0.301511	0.386861	1.38102	0.24058	0.382766	0.114294	0.301511
	117	0.369428	1.33333	1.07382	0.515399	1.41421	0.544617	0.114294	0.700071	0.262613	0.420808	0.388514	0.420808	0.554404	0.301511	0.386861	1.38102	0.24058	0.382766	0.114294	0.301511
	118	0.369428	1.33333	1.07382	0.515399	0.235702	0.544617	1.74707	2.12879	1.57568	1.55813	1.3598	1.55813	0.554404	2.31159	1.81968	1.38102	0.24058	0.382766	1.74707	2.31159
	119	0.369428	1.33333	1.07382	0.515399	0.235702	0.544617	1.74707	2.12879	1.57568	1.55813	1.3598	1.55813	1.70941	2.31159	1.81968	1.38102	0.24058	0.382766	1.74707	2.31159
	120	1.36788	1.33333	1.07382	0.515399	0.235702	0.544617	1.74707	0.700071	1.57568	1.55813	1.3598	1.55813	1.70941	2.31159	1.81968	0.475434	0.24058	0.382766	1.74707	2.31159
	121	-0.629026	0.0512821	-0.182109	-0.569652	0.235702	0.544617	0.114294	0.700071	0.262613	0.420808	0.388514	0.420808	0.554404	0.301511	0.386861	0.475434	0.24058	0.382766	0.114294	0.301511
	122	0.369428	0.0512821	-0.182109	1.60045	0.235702	-0.652344	0.114294	-0.728646	-1.05045	1.55813	1.3598	1.55813	1.70941	0.301511	1.81968	-0.430155	-0.993165	0.382766	0.114294	0.301511
	123	1.36788	1.33333	1.07382	1.60045	1.41421	0.544617	0.114294	-0.728646	0.262613	0.420808	0.388514	0.420808	0.554404	0.301511	0.386861	1.38102	0.24058	0.382766	0.114294	0.301511
	124	-0.629026	0.0512821	1.07382	0.515399	0.235702	-0.652344	0.114294	-0.728646	0.262613	0.420808	0.388514	0.420808	1.70941	2.31159	1.81968	-0.430155	-0.993165	-0.624513	0.114294	2.31159
	125	0.369428	1.33333	-0.182109	-0.569652	0.235702	-0.652344	0.114294	-0.728646	-1.05045	0.420808	0.388514	0.420808	1.70941	2.31159	1.81968	-0.430155	-0.993165	-0.624513	0.114294	2.31159
	126	1.36788	1.33333	1.07382	0.515399	0.235702	0.544617	0.114294	0.700071	0.262613	0.420808	0.388514	0.420808	1.70941	2.31159	1.81968	1.38102	1.47433	1.39004	0.114294	2.31159
	127	1.36788	0.0512821	-0.182109	-0.569652	0.235702	0.544617	1.74707	2.12879	1.57568	0.420808	0.388514	0.420808	-0.600604	0.301511	0.386861	1.38102	1.47433	0.382766	1.74707	0.301511
	128	0.369428	0.0512821	-0.182109	-0.569652	0.235702	0.544617	1.74707	2.12879	1.57568	0.420808	0.388514	0.420808	0.554404	-3.71864	0.386861	1.38102	1.47433	1.39004	1.74707	-3.71864
	129	1.36788	0.0512821	-0.182109	-0.569652	0.235702	0.544617	1.74707	2.12879	1.57568	0.420808	0.388514	0.420808	0.554404	0.301511	0.386861	0.475434	1.47433	1.39004	1.74707	0.301511
	130	-0.629026	0.0512821	1.07382	0.515399	0.235702	0.544617	0.114294	2.12879	1.57568	1.55813	1.3598	1.55813	0.554404	0.301511	0.386861	1.38102	1.47433	0.382766	0.114294	0.301511
	131	-0.629026	0.0512821	-0.182109	1.60045	0.235702	0.544617	0.114294	0.700071	0.262613	0.420808	0.388514	0.420808	1.70941	0.301511	0.386861	0.475434	1.47433	1.39004	0.114294	0.301511
	132	0.369428	1.33333	1.07382	0.515399	0.235702	0.544617	1.74707	2.12879	1.57568	1.55813	0.388514	1.55813	0.554404	0.301511	0.386861	1.38102	1.47433	1.39004	1.74707	0.301511
	133	1.36788	0.0512821	-0.182109	0.515399	0.235702	0.544617	0.114294	0.700071	0.262613	0.420808	0.388514	0.420808	0.554404	2.31159	0.386861	-0.430155	-0.993165	0.382766	0.114294	2.31159
	134	1.36788	0.0512821	-0.182109	0.515399	0.235702	0.544617	1.74707	2.12879	1.57568	1.55813	-0.582772	1.55813	-0.600604	0.301511	0.386861	1.38102	1.47433	1.39004	1.74707	0.301511
	135	1.36788	1.33333	1.07382	1.60045	1.41421	0.544617	1.74707	2.12879	1.57568	0.420808	0.388514	0.420808	1.70941	0.301511	0.386861	1.38102	1.47433	0.382766	1.74707	0.301511
	136	0.369428	0.0512821	-0.182109	1.60045	1.41421	0.544617	1.74707	2.12879	1.57568	0.420808	0.388514	0.420808	0.554404	0.301511	0.386861	1.38102	1.47433	1.39004	1.74707	0.301511
	137	1.36788	1.33333	1.07382	1.60045	0.235702	1.74158	1.74707	0.700071	0.262613	1.55813	1.3598	1.55813	0.554404	2.31159	1.81968	1.38102	1.47433	1.39004	1.74707	2.31159
	138	1.36788	1.33333	1.07382	1.60045	0.235702	1.74158	1.74707	0.700071	0.262613	1.55813	1.3598	1.55813	0.554404	0.301511	0.386861	0.475434	1.47433	0.382766	1.74707	0.301511
	139	1.36788	1.33333	1.07382	1.60045	1.41421	0.544617	0.114294	0.700071	0.262613	1.55813	0.388514	1.55813	0.554404	0.301511	0.386861	-0.430155	0.24058	0.382766	0.114294	0.301511
	140	1.36788	1.33333	1.07382	0.515399	1.41421	0.544617	0.114294	0.700071	0.262613	-0.716511	0.388514	-0.716511	0.554404	0.301511	0.386861	-1.33574	-0.993165	-0.624513	0.114294	0.301511
	141	0.369428	1.33333	-0.182109	0.515399	1.41421	0.544617	0.114294	0.700071	0.262613	-0.716511	-1.55406	-0.716511	-0.600604	-1.70856	-1.04596	-1.33574	-0.993165	-0.624513	0.114294	-1.70856
	142	0.369428	0.0512821	-0.182109	0.515399	0.235702	1.74158	0.114294	0.700071	0.262613	0.420808	1.3598	0.420808	-0.600604	0.301511	0.386861	0.475434	0.24058	0.382766	0.114294	0.301511
	143	1.36788	1.33333	1.07382	1.60045	1.41421	1.74158	0.114294	0.700071	0.262613	0.420808	0.388514	0.420808	1.70941	0.301511	0.386861	-1.33574	-0.993165	-0.624513	0.114294	0.301511
	144	1.36788	0.0512821	1.07382	1.60045	1.41421	1.74158	0.114294	0.700071	0.262613	0.420808	0.388514	0.420808	0.554404	0.301511	0.386861	1.38102	0.24058	0.382766	0.114294	0.301511
	145	-0.629026	0.0512821	1.07382	0.515399	0.235702	0.544617	0.114294	0.700071	0.262613	0.420808	0.388514	0.420808	-0.600604	0.301511	0.386861	0.475434	0.24058	0.382766	0.114294	0.301511
	146	-0.629026	0.0512821	1.07382	0.515399	0.235702	0.544617	0.114294	0.700071	0.262613	0.420808	0.388514	0.420808	-0.600604	0.301511	0.386861	0.475434	0.24058	0.382766	0.114294	0.301511
	147	1.36788	1.33333	1.07382	1.60045	0.235702	-0.652344	0.114294	-0.728646	0.262613	0.420808	1.3598	0.420808	-0.600604	0.301511	0.386861	0.475434	1.47433	1.39004	0.114294	0.301511
	148	0.369428	1.33333	1.07382	0.515399	0.235702	-0.652344	0.114294	-0.728646	0.262613	-0.716511	0.388514	-0.716511	-0.600604	0.301511	0.386861	0.475434	0.24058	0.382766	0.114294	0.301511
	149	1.36788	1.33333	1.07382	0.515399	1.41421	0.544617	0.114294	0.700071	0.262613	-0.716511	0.388514	-0.716511	0.554404	0.301511	0.386861	-1.33574	-0.993165	-0.624513	0.114294	0.301511
	150	0.369428	1.33333	-0.182109	0.515399	1.41421	0.544617	0.114294	0.700071	0.262613	-0.716511	-1.55406	-0.716511	-0.600604	-1.70856	-1.04596	-1.33574	-0.993165	-0.624513	0.114294	-1.70856
	151	0.369428	0.0512821	-0.182109	0.515399	0.235702	1.74158	0.114294	0.700071	0.262613	0.420808	1.3598	0.420808	-0.600604	0.301511	0.386861	0.475434	0.24058	0.382766	0.114294	0.301511
	152	1.36788	1.33333	1.07382	1.60045	1.41421	1.74158	0.114294	0.700071	0.262613	0.420808	0.388514	0.420808	1.70941	0.301511	0.386861	-1.33574	-0.993165	-0.624513	0.114294	0.301511
	153	1.36788	0.0512821	1.07382	1.60045	1.41421	1.74158	0.114294	0.700071	0.262613	0.420808	0.388514	0.420808	0.554404	0.301511	0.386861	1.38102	0.24058	0.382766	0.114294	0.301511
	154	-0.629026	0.0512821	1.07382	0.515399	0.235702	0.544617	0.114294	0.700071	0.262613	0.420808	0.388514	0.420808	-0.600604	0.301511	0.386861	0.475434	0.24058	0.382766	0.114294	0.301511
	155	-0.629026	0.0512821	1.07382	0.515399	0.235702	0.544617	0.114294	0.700071	0.262613	0.420808	0.388514	0.420808	-0.600604	0.301511	0.386861	0.475434	0.24058	0.382766	0.114294	0.301511
	156	1.36788	1.33333	1.07382	1.60045	0.235702	-0.652344	0.114294	-0.728646	0.262613	0.420808	1.3598	0.420808	-0.600604	0.301511	0.386861	0.475434	1.47433	1.39004	0.114294	0.301511
	157	0.369428	1.33333	1.07382	0.515399	0.235702	-0.652344	0.114294	-0.728646	0.262613	-0.716511	0.388514	-0.716511	-0.600604	0.301511	0.386861	0.475434	0.24058	0.382766	0.114294	0.301511
	158	1.36788	0.0512821	1.07382	0.515399	0.235702	0.544617	0.114294	0.700071	0.262613	-0.716511	0.388514	-0.716511	-0.600604	0.301511	0.386861	1.38102	1.47433	0.382766	0.114294	0.301511
	159	0.369428	1.33333	-0.182109	0.515399	0.235702	0.544617	0.114294	0.700071	0.262613	0.420808	0.388514	0.420808	-0.600604	0.301511	0.386861	-1.33574	0.24058	1.39004	0.114294	0.301511
	160	-0.629026	0.0512821	-1.43803	-1.6547	-2.12132	1.74158	1.74707	0.700071	1.57568	0.420808	0.388514	0.420808	0.554404	0.301511	0.386861	1.38102	1.47433	1.39004	1.74707	0.301511
	161	-1.62748	-1.23077	-1.43803	-1.6547	-2.12132	-0.652344	0.114294	0.700071	0.262613	-2.99115	-1.55406	-2.99115	-0.600604	-1.70856	-1.04596	-1.33574	-0.993165	-0.624513	0.114294	-1.70856
	162	1.36788	1.33333	1.07382	0.515399	0.235702	-0.652344	0.114294	-0.728646	0.262613	0.420808	0.388514	0.420808	0.554404	0.301511	0.386861	0.475434	0.24058	0.382766	0.114294	0.301511
	163	-0.629026	-1.23077	-0.182109	-0.569652	0.235702	-0.652344	0.114294	-0.728646	1.57568	0.420808	-0.582772	0.420808	0.554404	0.301511	0.386861	-0.430155	0.24058	0.382766	0.114294	0.301511
	164	-0.629026	-1.23077	-1.43803	-0.569652	-0.942809	-0.652344	0.114294	-0.728646	0.262613	0.420808	-0.582772	0.420808	0.554404	0.301511	0.386861	0.475434	0.24058	0.382766	0.114294	0.301511
	165	-0.629026	0.0512821	-0.182109	-0.569652	0.235702	-0.652344	-1.51848	-0.728646	-1.05045	-0.716511	0.388514	-0.716511	0.554404	0.301511	-1.04596	-0.430155	0.24058	-1.63179	-1.51848	0.301511
	166	-0.629026	0.0512821	-0.182109	-0.569652	0.235702	-0.652344	0.114294	-0.728646	-1.05045	-0.716511	-0.582772	-0.716511	-0.600604	0.301511	-1.04596	-0.430155	0.24058	-0.624513	0.114294	0.301511
	167	-1.62748	-1.23077	-1.43803	-0.569652	-0.942809	-0.652344	-1.51848	-0.728646	-1.05045	-0.716511	-1.55406	-0.716511	-0.600604	-1.70856	-1.04596	-0.430155	0.24058	-0.624513	-1.51848	-1.70856
	168	1.36788	0.0512821	1.07382	1.60045	1.41421	1.74158	0.114294	0.700071	0.262613	0.420808	0.388514	0.420808	0.554404	0.301511	0.386861	1.38102	0.24058	0.382766	0.114294	0.301511
	169	-0.629026	0.0512821	1.07382	0.515399	0.235702	0.544617	0.114294	0.700071	0.262613	0.420808	0.388514	0.420808	-0.600604	0.301511	0.386861	0.475434	0.24058	0.382766	0.114294	0.301511
	170	-0.629026	0.0512821	1.07382	0.515399	0.235702	0.544617	0.114294	0.700071	0.262613	0.420808	0.388514	0.420808	-0.600604	0.301511	0.386861	0.475434	0.24058	0.382766	0.114294	0.301511
	171	1.36788	1.33333	1.07382	1.60045	0.235702	-0.652344	0.114294	-0.728646	0.262613	0.420808	1.3598	0.420808	-0.600604	0.301511	0.386861	0.475434	1.47433	1.39004	0.114294	0.301511
	172	0.369428	1.33333	1.07382	0.515399	0.235702	-0.652344	0.114294	-0.728646	0.262613	-0.716511	0.388514	-0.716511	-0.600604	0.301511	0.386861	0.475434	0.24058	0.382766	0.114294	0.301511
	173	1.36788	1.33333	1.07382	0.515399	1.41421	0.544617	0.114294	0.700071	0.262613	-0.716511	0.388514	-0.716511	0.554404	0.301511	0.386861	-1.33574	-0.993165	-0.624513	0.114294	0.301511
	174	0.369428	1.33333	-0.182109	0.515399	1.41421	0.544617	0.114294	0.700071	0.262613	-0.716511	-1.55406	-0.716511	-0.600604	-1.70856	-1.04596	-1.33574	-0.993165	-0.624513	0.114294	-1.70856
	175	0.369428	0.0512821	-0.182109	0.515399	0.235702	1.74158	0.114294	0.700071	0.262613	0.420808	1.3598	0.420808	-0.600604	0.301511	0.386861	0.475434	0.24058	0.382766	0.114294	0.301511
	176	1.36788	1.33333	1.07382	1.60045	1.41421	1.74158	0.114294	0.700071	0.262613	0.420808	0.388514	0.420808	1.70941	0.301511	0.386861	-1.33574	-0.993165	-0.624513	0.114294	0.301511
	177	1.36788	0.0512821	1.07382	1.60045	1.41421	1.74158	0.114294	0.700071	0.262613	0.420808	0.388514	0.420808	0.554404	0.301511	0.386861	1.38102	0.24058	0.382766	0.114294	0.301511
	178	-0.629026	0.0512821	1.07382	0.515399	0.235702	0.544617	0.114294	0.700071	0.262613	0.420808	0.388514	0.420808	-0.600604	0.301511	0.386861	0.475434	0.24058	0.382766	0.114294	0.301511
	179	-0.629026	0.0512821	1.07382	0.515399	0.235702	0.544617	0.114294	0.700071	0.262613	0.420808	0.388514	0.420808	-0.600604	0.301511	0.386861	0.475434	0.24058	0.382766	0.114294	0.301511
	180	1.36788	1.33333	1.07382	1.60045	0.235702	-0.652344	0.114294	-0.728646	0.262613	0.420808	1.3598	0.420808	-0.600604	0.301511	0.386861	0.475434	1.47433	1.39004	0.114294	0.301511
	181	1.36788	1.33333	1.07382	0.515399	0.235702	-0.652344	0.114294	-0.728646	0.262613	0.420808	0.388514	0.420808	0.554404	0.301511	0.386861	0.475434	0.24058	0.382766	0.114294	0.301511
	182	-0.629026	-1.23077	-0.182109	-0.569652	0.235702	-0.652344	0.114294	-0.728646	1.57568	0.420808	-0.582772	0.420808	0.554404	0.301511	0.386861	-0.430155	0.24058	0.382766	0.114294	0.301511
	183	-0.629026	-1.23077	-1.43803	-0.569652	-0.942809	-0.652344	0.114294	-0.728646	0.262613	0.420808	-0.582772	0.420808	0.554404	0.301511	0.386861	0.475434	0.24058	0.382766	0.114294	0.301511
	184	-0.629026	0.0512821	-0.182109	-0.569652	0.235702	-0.652344	-1.51848	-0.728646	-1.05045	-0.716511	0.388514	-0.716511	0.554404	0.301511	-1.04596	-0.430155	0.24058	-1.63179	-1.51848	0.301511
	185	-0.629026	0.0512821	-0.182109	-0.569652	0.235702	-0.652344	0.114294	-0.728646	-1.05045	-0.716511	-0.582772	-0.716511	-0.600604	0.301511	-1.04596	-0.430155	0.24058	-0.624513	0.114294	0.301511
	186	-1.62748	-1.23077	-1.43803	-0.569652	-0.942809	-0.652344	-1.51848	-0.728646	-1.05045	-0.716511	-1.55406	-0.716511	-0.600604	-1.70856	-1.04596	-0.430155	0.24058	-0.624513	-1.51848	-1.70856
	187	1.36788	0.0512821	1.07382	1.60045	1.41421	1.74158	0.114294	0.700071	0.262613	0.420808	0.388514	0.420808	0.554404	0.301511	0.386861	1.38102	0.24058	0.382766	0.114294	0.301511
	188	-0.629026	0.0512821	1.07382	0.515399	0.235702	0.544617	0.114294	0.700071	0.262613	0.420808	0.388514	0.420808	-0.600604	0.301511	0.386861	0.475434	0.24058	0.382766	0.114294	0.301511
	189	-0.629026	0.0512821	1.07382	0.515399	0.235702	0.544617	0.114294	0.700071	0.262613	0.420808	0.388514	0.420808	-0.600604	0.301511	0.386861	0.475434	0.24058	0.382766	0.114294	0.301511
	190	1.36788	1.33333	1.07382	1.60045	0.235702	-0.652344	0.114294	-0.728646	0.262613	0.420808	1.3598	0.420808	-0.600604	0.301511	0.386861	0.475434	1.47433	1.39004	0.114294	0.301511
	191	0.369428	1.33333	1.07382	0.515399	0.235702	-0.652344	0.114294	-0.728646	0.262613	-0.716511	0.388514	-0.716511	-0.600604	0.301511	0.386861	0.475434	0.24058	0.382766	0.114294	0.301511
	192	1.36788	1.33333	1.07382	0.515399	1.41421	0.544617	0.114294	0.700071	0.262613	-0.716511	0.388514	-0.716511	0.554404	0.301511	0.386861	-1.33574	-0.993165	-0.624513	0.114294	0.301511
	193	0.369428	1.33333	-0.182109	0.515399	1.41421	0.544617	0.114294	0.700071	0.262613	-0.716511	-1.55406	-0.716511	-0.600604	-1.70856	-1.04596	-1.33574	-0.993165	-0.624513	0.114294	-1.70856
	194	0.369428	0.0512821	-0.182109	0.515399	0.235702	1.74158	0.114294	0.700071	0.262613	0.420808	1.3598	0.420808	-0.600604	0.301511	0.386861	0.475434	0.24058	0.382766	0.114294	0.301511
	195	1.36788	1.33333	1.07382	1.60045	0.235702	-0.652344	0.114294	-0.728646	0.262613	0.420808	1.3598	0.420808	-0.600604	0.301511	0.386861	0.475434	1.47433	1.39004	0.114294	0.301511
	196	0.369428	1.33333	1.07382	0.515399	0.235702	-0.652344	0.114294	-0.728646	0.262613	-0.716511	0.388514	-0.716511	-0.600604	0.301511	0.386861	0.475434	0.24058	0.382766	0.114294	0.301511
	197	1.36788	1.33333	1.07382	0.515399	1.41421	0.544617	0.114294	0.700071	0.262613	-0.716511	0.388514	-0.716511	0.554404	0.301511	0.386861	-1.33574	-0.993165	-0.624513	0.114294	0.301511
	198	0.369428	1.33333	-0.182109	0.515399	1.41421	0.544617	0.114294	0.700071	0.262613	-0.716511	-1.55406	-0.716511	-0.600604	-1.70856	-1.04596	-1.33574	-0.993165	-0.624513	0.114294	-1.70856
	199	0.369428	0.0512821	-0.182109	0.515399	0.235702	1.74158	0.114294	0.700071	0.262613	0.420808	1.3598	0.420808	-0.600604	0.301511	0.386861	0.475434	0.24058	0.382766	0.114294	0.301511
	Indicator data (correlations)
	Empirical correlation matrix
		CW1	CW2	CW3	CW4	CW5	EE1	EE2	EE3	EE4	EE5	HC1	HC2	HC3	HC4	HC5	IS1	IS2	IS3	IS4	IS5
	CW1	1	0.729895	0.725618	0.757549	0.742491	0.569649	0.479457	0.426098	0.538835	0.525878	0.62745	0.525878	0.573613	0.540878	0.629608	0.507024	0.490087	0.577686	0.479457	0.540878
	CW2	0.729895	1	0.741962	0.696937	0.622496	0.455459	0.3814	0.467813	0.407387	0.342945	0.478172	0.342945	0.37138	0.383976	0.421028	0.289092	0.327733	0.406527	0.3814	0.383976
	CW3	0.725618	0.741962	1	0.809299	0.731181	0.527619	0.410437	0.459447	0.468348	0.46944	0.607492	0.46944	0.434601	0.509319	0.556319	0.484655	0.431185	0.499828	0.410437	0.509319
	CW4	0.757549	0.696937	0.809299	1	0.773641	0.615452	0.472586	0.48406	0.49866	0.566737	0.627068	0.566737	0.485005	0.498912	0.609046	0.49192	0.51857	0.567787	0.472586	0.498912
	CW5	0.742491	0.622496	0.731181	0.773641	1	0.626321	0.502228	0.483239	0.48745	0.550881	0.589506	0.550881	0.597563	0.497468	0.601139	0.405554	0.415839	0.509261	0.502228	0.497468
	EE1	0.569649	0.455459	0.527619	0.615452	0.626321	1	0.621782	0.738857	0.627103	0.56039	0.567345	0.56039	0.479175	0.425257	0.569646	0.488999	0.430139	0.545085	0.621782	0.425257
	EE2	0.479457	0.3814	0.410437	0.472586	0.502228	0.621782	1	0.689801	0.806121	0.638989	0.605811	0.638989	0.502396	0.490659	0.669322	0.581469	0.627193	0.679902	1	0.490659
	EE3	0.426098	0.467813	0.459447	0.48406	0.483239	0.738857	0.689801	1	0.679111	0.452862	0.407982	0.452862	0.354459	0.277132	0.425181	0.436992	0.430886	0.473181	0.689801	0.277132
	EE4	0.538835	0.407387	0.468348	0.49866	0.48745	0.627103	0.806121	0.679111	1	0.621243	0.535652	0.621243	0.54446	0.448691	0.679179	0.576712	0.633415	0.679828	0.806121	0.448691
	EE5	0.525878	0.342945	0.46944	0.566737	0.550881	0.56039	0.638989	0.452862	0.621243	1	0.764426	1	0.679663	0.650394	0.782357	0.685685	0.649453	0.732495	0.638989	0.650394
	HC1	0.62745	0.478172	0.607492	0.627068	0.589506	0.567345	0.605811	0.407982	0.535652	0.764426	1	0.764426	0.620379	0.722372	0.796038	0.672883	0.661472	0.712243	0.605811	0.722372
	HC2	0.525878	0.342945	0.46944	0.566737	0.550881	0.56039	0.638989	0.452862	0.621243	1	0.764426	1	0.679663	0.650394	0.782357	0.685685	0.649453	0.732495	0.638989	0.650394
	HC3	0.573613	0.37138	0.434601	0.485005	0.597563	0.479175	0.502396	0.354459	0.54446	0.679663	0.620379	0.679663	1	0.668637	0.753649	0.499971	0.479366	0.544013	0.502396	0.668637
	HC4	0.540878	0.383976	0.509319	0.498912	0.497468	0.425257	0.490659	0.277132	0.448691	0.650394	0.722372	0.650394	0.668637	1	0.833781	0.557468	0.522644	0.593239	0.490659	1
	HC5	0.629608	0.421028	0.556319	0.609046	0.601139	0.569646	0.669322	0.425181	0.679179	0.782357	0.796038	0.782357	0.753649	0.833781	1	0.646502	0.640538	0.753952	0.669322	0.833781
	IS1	0.507024	0.289092	0.484655	0.49192	0.405554	0.488999	0.581469	0.436992	0.576712	0.685685	0.672883	0.685685	0.499971	0.557468	0.646502	1	0.82971	0.762127	0.581469	0.557468
	IS2	0.490087	0.327733	0.431185	0.51857	0.415839	0.430139	0.627193	0.430886	0.633415	0.649453	0.661472	0.649453	0.479366	0.522644	0.640538	0.82971	1	0.821317	0.627193	0.522644
	IS3	0.577686	0.406527	0.499828	0.567787	0.509261	0.545085	0.679902	0.473181	0.679828	0.732495	0.712243	0.732495	0.544013	0.593239	0.753952	0.762127	0.821317	1	0.679902	0.593239
	IS4	0.479457	0.3814	0.410437	0.472586	0.502228	0.621782	1	0.689801	0.806121	0.638989	0.605811	0.638989	0.502396	0.490659	0.669322	0.581469	0.627193	0.679902	1	0.490659
	IS5	0.540878	0.383976	0.509319	0.498912	0.497468	0.425257	0.490659	0.277132	0.448691	0.650394	0.722372	0.650394	0.668637	1	0.833781	0.557468	0.522644	0.593239	0.490659	1
	Model implied saturated correlation matrix
		CW1	CW2	CW3	CW4	CW5	EE1	EE2	EE3	EE4	EE5	HC1	HC2	HC3	HC4	HC5	IS1	IS2	IS3	IS4	IS5
	CW1	1	0.750223	0.806601	0.819625	0.790027	0.493461	0.524713	0.483401	0.521491	0.475904	0.539301	0.533437	0.504811	0.530483	0.57305	0.492709	0.500901	0.512781	0.444644	0.431327
	CW2	0.750223	1	0.754692	0.766878	0.739185	0.461704	0.490944	0.452292	0.487931	0.445277	0.504594	0.499107	0.472323	0.496343	0.536172	0.461	0.468665	0.479781	0.416029	0.403569
	CW3	0.806601	0.754692	1	0.824508	0.794734	0.496401	0.527838	0.486281	0.524598	0.478739	0.542514	0.536614	0.507818	0.533643	0.576464	0.495644	0.503885	0.515836	0.447293	0.433896
	CW4	0.819625	0.766878	0.824508	1	0.807566	0.504416	0.536361	0.494133	0.533068	0.486469	0.551274	0.545279	0.516018	0.54226	0.585772	0.503647	0.512021	0.524165	0.454515	0.440902
	CW5	0.790027	0.739185	0.794734	0.807566	1	0.4862	0.516992	0.476289	0.513818	0.468902	0.531366	0.525588	0.497383	0.522678	0.564619	0.485459	0.493531	0.505237	0.438102	0.42498
	EE1	0.493461	0.461704	0.496401	0.504416	0.4862	1	0.738954	0.680775	0.734417	0.670216	0.580718	0.574403	0.543579	0.571222	0.617059	0.606022	0.616098	0.630711	0.546903	0.530523
	EE2	0.524713	0.490944	0.527838	0.536361	0.516992	0.738954	1	0.723889	0.780929	0.712662	0.617496	0.61078	0.578004	0.607398	0.656138	0.644402	0.655116	0.670654	0.581539	0.564122
	EE3	0.483401	0.452292	0.486281	0.494133	0.476289	0.680775	0.723889	1	0.719446	0.656553	0.568879	0.562693	0.532497	0.559577	0.60448	0.593668	0.603538	0.617853	0.535754	0.519708
	EE4	0.521491	0.487931	0.524598	0.533068	0.513818	0.734417	0.780929	0.719446	1	0.708287	0.613705	0.607031	0.574456	0.60367	0.65211	0.640446	0.651094	0.666537	0.577969	0.560659
	EE5	0.475904	0.445277	0.478739	0.486469	0.468902	0.670216	0.712662	0.656553	0.708287	1	0.560056	0.553966	0.524238	0.550898	0.595104	0.58446	0.594177	0.60827	0.527445	0.511647
	HC1	0.539301	0.504594	0.542514	0.551274	0.531366	0.580718	0.617496	0.568879	0.613705	0.560056	1	0.781822	0.739867	0.777493	0.839882	0.681202	0.692527	0.708953	0.614749	0.596337
	HC2	0.533437	0.499107	0.536614	0.545279	0.525588	0.574403	0.61078	0.562693	0.607031	0.553966	0.781822	1	0.731821	0.769038	0.830748	0.673794	0.684996	0.701243	0.608064	0.589852
	HC3	0.504811	0.472323	0.507818	0.516018	0.497383	0.543579	0.578004	0.532497	0.574456	0.524238	0.739867	0.731821	1	0.727769	0.786168	0.637636	0.648237	0.663612	0.575433	0.558199
	HC4	0.530483	0.496343	0.533643	0.54226	0.522678	0.571222	0.607398	0.559577	0.60367	0.550898	0.777493	0.769038	0.727769	1	0.826148	0.670063	0.681203	0.69736	0.604697	0.586586
	HC5	0.57305	0.536172	0.576464	0.585772	0.564619	0.617059	0.656138	0.60448	0.65211	0.595104	0.839882	0.830748	0.786168	0.826148	1	0.723831	0.735865	0.753319	0.65322	0.633655
	IS1	0.492709	0.461	0.495644	0.503647	0.485459	0.606022	0.644402	0.593668	0.640446	0.58446	0.681202	0.673794	0.637636	0.670063	0.723831	1	0.778948	0.797423	0.691463	0.670754
	IS2	0.500901	0.468665	0.503885	0.512021	0.493531	0.616098	0.655116	0.603538	0.651094	0.594177	0.692527	0.684996	0.648237	0.681203	0.735865	0.778948	1	0.810681	0.70296	0.681906
	IS3	0.512781	0.479781	0.515836	0.524165	0.505237	0.630711	0.670654	0.617853	0.666537	0.60827	0.708953	0.701243	0.663612	0.69736	0.753319	0.797423	0.810681	1	0.719633	0.698079
	IS4	0.444644	0.416029	0.447293	0.454515	0.438102	0.546903	0.581539	0.535754	0.577969	0.527445	0.614749	0.608064	0.575433	0.604697	0.65322	0.691463	0.70296	0.719633	1	0.60532
	IS5	0.431327	0.403569	0.433896	0.440902	0.42498	0.530523	0.564122	0.519708	0.560659	0.511647	0.596337	0.589852	0.558199	0.586586	0.633655	0.670754	0.681906	0.698079	0.60532	1
	Model implied estimated correlation matrix
		CW1	CW2	CW3	CW4	CW5	EE1	EE2	EE3	EE4	EE5	HC1	HC2	HC3	HC4	HC5	IS1	IS2	IS3	IS4	IS5
	CW1	1	0.750223	0.806601	0.819625	0.790027	0.493461	0.524713	0.483401	0.521491	0.475904	0.539301	0.533437	0.504811	0.530483	0.57305	0.492709	0.500901	0.512781	0.444644	0.431327
	CW2	0.750223	1	0.754692	0.766878	0.739185	0.461704	0.490944	0.452292	0.487931	0.445277	0.504594	0.499107	0.472323	0.496343	0.536172	0.461	0.468665	0.479781	0.416029	0.403569
	CW3	0.806601	0.754692	1	0.824508	0.794734	0.496401	0.527838	0.486281	0.524598	0.478739	0.542514	0.536614	0.507818	0.533643	0.576464	0.495644	0.503885	0.515836	0.447293	0.433896
	CW4	0.819625	0.766878	0.824508	1	0.807566	0.504416	0.536361	0.494133	0.533068	0.486469	0.551274	0.545279	0.516018	0.54226	0.585772	0.503647	0.512021	0.524165	0.454515	0.440902
	CW5	0.790027	0.739185	0.794734	0.807566	1	0.4862	0.516992	0.476289	0.513818	0.468902	0.531366	0.525588	0.497383	0.522678	0.564619	0.485459	0.493531	0.505237	0.438102	0.42498
	EE1	0.493461	0.461704	0.496401	0.504416	0.4862	1	0.738954	0.680775	0.734417	0.670216	0.580718	0.574403	0.543579	0.571222	0.617059	0.606022	0.616098	0.630711	0.546903	0.530523
	EE2	0.524713	0.490944	0.527838	0.536361	0.516992	0.738954	1	0.723889	0.780929	0.712662	0.617496	0.61078	0.578004	0.607398	0.656138	0.644402	0.655116	0.670654	0.581539	0.564122
	EE3	0.483401	0.452292	0.486281	0.494133	0.476289	0.680775	0.723889	1	0.719446	0.656553	0.568879	0.562693	0.532497	0.559577	0.60448	0.593668	0.603538	0.617853	0.535754	0.519708
	EE4	0.521491	0.487931	0.524598	0.533068	0.513818	0.734417	0.780929	0.719446	1	0.708287	0.613705	0.607031	0.574456	0.60367	0.65211	0.640446	0.651094	0.666537	0.577969	0.560659
	EE5	0.475904	0.445277	0.478739	0.486469	0.468902	0.670216	0.712662	0.656553	0.708287	1	0.560056	0.553966	0.524238	0.550898	0.595104	0.58446	0.594177	0.60827	0.527445	0.511647
	HC1	0.539301	0.504594	0.542514	0.551274	0.531366	0.580718	0.617496	0.568879	0.613705	0.560056	1	0.781822	0.739867	0.777493	0.839882	0.681202	0.692527	0.708953	0.614749	0.596337
	HC2	0.533437	0.499107	0.536614	0.545279	0.525588	0.574403	0.61078	0.562693	0.607031	0.553966	0.781822	1	0.731821	0.769038	0.830748	0.673794	0.684996	0.701243	0.608064	0.589852
	HC3	0.504811	0.472323	0.507818	0.516018	0.497383	0.543579	0.578004	0.532497	0.574456	0.524238	0.739867	0.731821	1	0.727769	0.786168	0.637636	0.648237	0.663612	0.575433	0.558199
	HC4	0.530483	0.496343	0.533643	0.54226	0.522678	0.571222	0.607398	0.559577	0.60367	0.550898	0.777493	0.769038	0.727769	1	0.826148	0.670063	0.681203	0.69736	0.604697	0.586586
	HC5	0.57305	0.536172	0.576464	0.585772	0.564619	0.617059	0.656138	0.60448	0.65211	0.595104	0.839882	0.830748	0.786168	0.826148	1	0.723831	0.735865	0.753319	0.65322	0.633655
	IS1	0.492709	0.461	0.495644	0.503647	0.485459	0.606022	0.644402	0.593668	0.640446	0.58446	0.681202	0.673794	0.637636	0.670063	0.723831	1	0.778948	0.797423	0.691463	0.670754
	IS2	0.500901	0.468665	0.503885	0.512021	0.493531	0.616098	0.655116	0.603538	0.651094	0.594177	0.692527	0.684996	0.648237	0.681203	0.735865	0.778948	1	0.810681	0.70296	0.681906
	IS3	0.512781	0.479781	0.515836	0.524165	0.505237	0.630711	0.670654	0.617853	0.666537	0.60827	0.708953	0.701243	0.663612	0.69736	0.753319	0.797423	0.810681	1	0.719633	0.698079
	IS4	0.444644	0.416029	0.447293	0.454515	0.438102	0.546903	0.581539	0.535754	0.577969	0.527445	0.614749	0.608064	0.575433	0.604697	0.65322	0.691463	0.70296	0.719633	1	0.60532
	IS5	0.431327	0.403569	0.433896	0.440902	0.42498	0.530523	0.564122	0.519708	0.560659	0.511647	0.596337	0.589852	0.558199	0.586586	0.633655	0.670754	0.681906	0.698079	0.60532	1
	Empirical covariance matrix
		CW1	CW2	CW3	CW4	CW5	EE1	EE2	EE3	EE4	EE5	HC1	HC2	HC3	HC4	HC5	IS1	IS2	IS3	IS4	IS5
	CW1	1	0.729895	0.725618	0.757549	0.742491	0.569649	0.479457	0.426098	0.538835	0.525878	0.62745	0.525878	0.573613	0.540878	0.629608	0.507024	0.490087	0.577686	0.479457	0.540878
	CW2	0.729895	1	0.741962	0.696937	0.622496	0.455459	0.3814	0.467813	0.407387	0.342945	0.478172	0.342945	0.37138	0.383976	0.421028	0.289092	0.327733	0.406527	0.3814	0.383976
	CW3	0.725618	0.741962	1	0.809299	0.731181	0.527619	0.410437	0.459447	0.468348	0.46944	0.607492	0.46944	0.434601	0.509319	0.556319	0.484655	0.431185	0.499828	0.410437	0.509319
	CW4	0.757549	0.696937	0.809299	1	0.773641	0.615452	0.472586	0.48406	0.49866	0.566737	0.627068	0.566737	0.485005	0.498912	0.609046	0.49192	0.51857	0.567787	0.472586	0.498912
	CW5	0.742491	0.622496	0.731181	0.773641	1	0.626321	0.502228	0.483239	0.48745	0.550881	0.589506	0.550881	0.597563	0.497468	0.601139	0.405554	0.415839	0.509261	0.502228	0.497468
	EE1	0.569649	0.455459	0.527619	0.615452	0.626321	1	0.621782	0.738857	0.627103	0.56039	0.567345	0.56039	0.479175	0.425257	0.569646	0.488999	0.430139	0.545085	0.621782	0.425257
	EE2	0.479457	0.3814	0.410437	0.472586	0.502228	0.621782	1	0.689801	0.806121	0.638989	0.605811	0.638989	0.502396	0.490659	0.669322	0.581469	0.627193	0.679902	1	0.490659
	EE3	0.426098	0.467813	0.459447	0.48406	0.483239	0.738857	0.689801	1	0.679111	0.452862	0.407982	0.452862	0.354459	0.277132	0.425181	0.436992	0.430886	0.473181	0.689801	0.277132
	EE4	0.538835	0.407387	0.468348	0.49866	0.48745	0.627103	0.806121	0.679111	1	0.621243	0.535652	0.621243	0.54446	0.448691	0.679179	0.576712	0.633415	0.679828	0.806121	0.448691
	EE5	0.525878	0.342945	0.46944	0.566737	0.550881	0.56039	0.638989	0.452862	0.621243	1	0.764426	1	0.679663	0.650394	0.782357	0.685685	0.649453	0.732495	0.638989	0.650394
	HC1	0.62745	0.478172	0.607492	0.627068	0.589506	0.567345	0.605811	0.407982	0.535652	0.764426	1	0.764426	0.620379	0.722372	0.796038	0.672883	0.661472	0.712243	0.605811	0.722372
	HC2	0.525878	0.342945	0.46944	0.566737	0.550881	0.56039	0.638989	0.452862	0.621243	1	0.764426	1	0.679663	0.650394	0.782357	0.685685	0.649453	0.732495	0.638989	0.650394
	HC3	0.573613	0.37138	0.434601	0.485005	0.597563	0.479175	0.502396	0.354459	0.54446	0.679663	0.620379	0.679663	1	0.668637	0.753649	0.499971	0.479366	0.544013	0.502396	0.668637
	HC4	0.540878	0.383976	0.509319	0.498912	0.497468	0.425257	0.490659	0.277132	0.448691	0.650394	0.722372	0.650394	0.668637	1	0.833781	0.557468	0.522644	0.593239	0.490659	1
	HC5	0.629608	0.421028	0.556319	0.609046	0.601139	0.569646	0.669322	0.425181	0.679179	0.782357	0.796038	0.782357	0.753649	0.833781	1	0.646502	0.640538	0.753952	0.669322	0.833781
	IS1	0.507024	0.289092	0.484655	0.49192	0.405554	0.488999	0.581469	0.436992	0.576712	0.685685	0.672883	0.685685	0.499971	0.557468	0.646502	1	0.82971	0.762127	0.581469	0.557468
	IS2	0.490087	0.327733	0.431185	0.51857	0.415839	0.430139	0.627193	0.430886	0.633415	0.649453	0.661472	0.649453	0.479366	0.522644	0.640538	0.82971	1	0.821317	0.627193	0.522644
	IS3	0.577686	0.406527	0.499828	0.567787	0.509261	0.545085	0.679902	0.473181	0.679828	0.732495	0.712243	0.732495	0.544013	0.593239	0.753952	0.762127	0.821317	1	0.679902	0.593239
	IS4	0.479457	0.3814	0.410437	0.472586	0.502228	0.621782	1	0.689801	0.806121	0.638989	0.605811	0.638989	0.502396	0.490659	0.669322	0.581469	0.627193	0.679902	1	0.490659
	IS5	0.540878	0.383976	0.509319	0.498912	0.497468	0.425257	0.490659	0.277132	0.448691	0.650394	0.722372	0.650394	0.668637	1	0.833781	0.557468	0.522644	0.593239	0.490659	1

## Sheet: complete Charts
	SmartPLS report
	Please cite the use of SmartPLS: Ringle, C. M., Wende, S., and Becker, J.-M. 2024. "SmartPLS 4." Bönningstedt: SmartPLS, https://www.smartpls.com.
